# Supplementary material
Source: Research Square preprint supplement (doi:10.21203/rs.3.rs-9570638/v1)
Supplement: Supplementary file 1 [file 201c95aaf5d5dcf1a6584bff.xlsx]

## Sheet: Sheet1
Table S5. Cis-elements involved in drought and light responsiveness in the pan-genome promoter of TaVTC4-4B
Element name	Sequence	Function
DRE core	GCCGAC	DREB-type transcription factor binding element
MBS	CAACTG	MYB binding site involved in drought-inducibility
GA-motif	ATAGATAA	part of a light responsive element
GATA-motif	GATAGGG	part of a light responsive element
G-Box	CACGTT/CACGAC	cis-acting regulatory element involved in light responsiveness
I-box	AAGATAAGGCT/GTATAAGGCC	part of a light responsive element
Sp1	GGGCGG	light responsive element
TCCC-motif	TCTCCCT	part of a light responsive element
