# Supplementary material
Source: Research Square preprint supplement (doi:10.21203/rs.3.rs-9570638/v1)
Supplement: Supplementary file 2 [file 20ee322832abb6b8ae41bc1e.xlsx]

## Sheet: Sheet1
Table S6. Statistical analysis of TaVTC4-4B expression variation in the wheat pan-transcriptome
Accession	Dawn	Flag leaf	Grain	Root	Spike	Dusk
Arinalrfor	4119.94	3192.06	1534.65	2095.97	2571.87	3381.47
Cadenza	4298.65	4732.95	1132.51	2220.24	2566.52	3822.91
Claire	4412.92	3302.9	1580.08	2230.17	2472.98	3669.69
Jagger	4063.68	2288.51	1624.24	2158.2	2227.13	3458.97
Julius	3509.98	3432.68	1467.39	2242.5	2571.64	3684.63
Lancer	4518.52	3506.7	2565.47	1832.71	1844.41
Landmark	4192.66	3628.12		1681.44	2771.67	3369.78
Mace	3994.49	3640.27		2805.06	2364.34	3023.45
Mattis	3827.11	3089.37	1790.81	1931.57	2240.74	3532.43
Norin61	4493.59	2890.76	1131.84	2119.41	2478.05	3102.98
Paragon			3600.58	1709.85	2279.58	2927.16
Robigus	3846.8	4036.08	2968.07	1888	2422.1	3525.31
Stanley	4219.95			2866.64	2322.52	2993.42
Weebil	4120.84	3533.42	1918.63	1846.43	2302.79	3548.83
