# Supplementary material
Source: Research Square preprint supplement (doi:10.21203/rs.3.rs-9570638/v1)
Supplement: Supplementary file 3 [file 387c5f111f8241a07116e067.xlsx]

## Sheet: Sheet1
Table S1. Primers used for quantitative real‑time PCR analysis of FIG superfamily members in wheat.
Primer names	Sequence
RT-TaActin-F	ACCTTCAGTTGCCCAGCAAT
RT-TaActin-R	CAGAGTCGAGCACAATACCAGTTG
RT-TaCFBP1-4A-F	ACGGTACGTGGCGTGTAAGC
RT-TaCFBP1-4B-F	AGATCGGCGGCGGCCGCG
RT-TaCFBP1-4D-F	TGGCGGCCGCGGCTCC
RT-TaCFBP1-R	CACGATGTAGTTGCCCGAGTAGC
RT-TaCYFBP-1A-F	AACCCGGGACTAACATGATTGCT
RT-TaCYFBP-1B-F	TGCTGCAACCCGGGACTG
RT-TaCYFBP-1D.1-F	TGCTGCAACCCGGGACCC
RT-TaCYFBP-1D.2-F	GAGCTCATGCACGCTTGTCC
RT-TaCYFBP-R	ACATCATCGTAGCTCCCGAGGA
RT-TaCYFBP-3A-F	GATGGTTCATCACCTAAATCCC
RT-TaCYFBP-3B-F	GATGGTTCATCACCCAAATCCT
RT-TaCYFBP-3D-F	GGATGGTTCATCACCCAAATCA
RT-TaCYFBP-R	TCCAGCCTCCTCCATCAGGAA
RT-TaFBP1-7A-F	CCGGGGACGGCATGGCGT
RT-TaFBP1-R	CGACGAGGACGGCGAGGT
RT-TaFBP1-7B-F	GGGGACGGCGGTATGGCG
RT-TaFBP1-7D-F	GCATGGCGACGCACGGGG
RT-TaHL-6A-F	GCTGGAGCGCGGGAGTGG
RT-TaHL-R	GCGACGGTGACCGGAGAG
RT-TaHL-6B-F	CGGACTGGCGCGGGTTGC
RT-TaHL-6D-F	CCCTCCCCCTCCCCCTCC
RT-TaIMPL1-6A-F	AAACCCTTTCTCTCAGCACCA
RT-TaIMPL1-R	AAAGAATCTCCAATAAGGCCA
RT-TaIMPL1-6B-F	CATGGCGGTGGCGTCGAG
RT-TaIMPL1-6D-F	GGCGCCGATCCTCGCCCC
RT-TaIMPL2-3A-F	GCGGCGGGTCGGGCGTGT
RT-TaIMPL2-R	CCAGCCCCCCGCCTCAGA
RT-TaIMPL2-3B-F	ACCTTTCCCCTTCCCCAT
RT-TaIMPL2-3D-F	TTCACAAAACCTAGCCTCCCTT
RT-TaIMPL3-2A-F	CAGCCGCGGAGGACGGAA
RT-TaIMPL3-2R	CCACCAGAGGTATTGATGGAAACA
RT-TaIMPL3-2B-F	GGCAGCGTTGATATCGTCG
RT-TaIMPL2-3D-F	TTCACAAAACCTAGCCTCCCTT
RT-TaIMPL3-6A-F	TCCTTTAACTCATGATGATGTGC
RT-TaIMPL3-6R	GGCTCAGATTCATCCATTGTCG
RT-TaIMPL3-6B-F	GTCGTCTAGTGCTACTGATAGTAAT
RT-TaIMPL3-6D-F	GAGTCCATTTCAAGTTTTTTCA
RT-TaSAL1-4A-F	AATCGTGCAGTCAGACATTCAATCT
RT-TaSAL1-5A-F	CTCAGAAGACTTGAGAAAGGATAAC
RT-TaSAL1-R	CTCTCAAGAAACCTTTAGTCCCATC
RT-TaSAL1-5B-F	CTCAGAAGACTTGAGAAAGGATAGT
RT-TaSAL1-5D-F	CTCAGAAGACTTGAGAAAGGATAGC
RT-TaSAL1-7A-F	TGAGGATGGTTCATACAACCTTTTA
RT-TaSBPASE-3A-F	GGGGCGGCAGTCCAAGGC
RT-TaSBPASE-R	TCGTCGCCGAAGGAGTTGA
RT-TaSBPASE-3B-F	CTTGATGAGGGCAGAGTTGTCTTGGG
RT-TaSBPASE-3B-R	AACGAGGCATTGGCTGGATTGTCA
RT-TaSBPASE-3D-F	GCCACGCGCTCCCCCGCC
RT-TaVTC4-4A-F	CTGGCCGCAGCGGTGGA
RT-TaVTC4-R	AGAACCATTGAGAAAAGCACCT
RT-TaVTC4-4B-F	TGACGGAGACGGACAAGGCA
RT-TaVTC4-4D-F	GACGTCTGCAGCCCTCGGT
