# Supplementary material
Source: Research Square preprint supplement (doi:10.21203/rs.3.rs-9570638/v1)
Supplement: Supplementary file 4 [file 7200b8dbbbde8fd15adaa670.xlsx]

## Sheet: Sheet1
Table S4. Identification of duplication events in FIG superfamily members
	Chinese Spring	Alchemy	Arinalrfor	Cadenza	Claire	Jagger	Julius	Kariega	Lancer	Landmark	Mace	Mattis	Norin61	Paragon	Renan	Robigus	Stanley	Weebil
Dispersed	2	4	6	39	38	6	4	8	4	4	4	4	5	1	3	34	6	38
Proximal	1	1	2	0	0	2	1	1	2	1	2	2	2	0	1	0	1	0
Singleton	0	0	0	0	0	0	0	0	0	0	0	0	0	0	0	0	0	0
WGD or Segmental	36	30	32	0	0	31	34	23	33	35	34	33	32	33	29	5	32	0
Tandem	0	0	0	0	0	0	0	0	0	0	0	0	0	0	4	0	0	0
unknown	0	1	3	0	0	0	0	0	0	0	0	0	0	0	0	0	0	0
