# Supplementary material
Source: Research Square preprint supplement (doi:10.21203/rs.3.rs-9570638/v1)
Supplement: Supplementary file 5 [file bfcba75f5a47939a3ffa0f34.xlsx]

## Sheet: Sheet1
Table S7. Comparative analysis of FIG superfamily expression patterns under drought and salt stress conditions
Gene	Ningmai13			Jimai23			Yannong1212			Zhengmai366			Jinmai47			Xinong928
	Control	Drought stress	Salt stress	Control	Drought stress	Salt stress	Control	Drought stress	Salt stress	Control	Drought stress	Salt stress	Control	Drought stress	Salt stress	Control	Drought stress	Salt stress
TaCFBP1-4A	0.35 ± 0.08	0.13 ± 0.05*	2.28 ± 0.9*	0.74 ± 0.17	0.19 ± 0.02**	2.72 ± 0.79*	0.38 ± 0.05	0.1 ± 0.05**	2.74 ± 0.2***	0.78 ± 0.14	0.18 ± 0**	3.15 ± 0.82**	0.41 ± 0.05	0.14 ± 0.06**	1.83 ± 0.99	0.7 ± 0.14	0.17 ± 0**	2.28 ± 0.07***
TaCFBP1-4B	0.66 ± 0.14	0.26 ± 0.11*	2.73 ± 1.08*	0.6 ± 0.13	0.27 ± 0.01*	3.15 ± 1.54*	0.7 ± 0.09	0.21 ± 0.1**	3.28 ± 0.24***	0.54 ± 0.14	0.28 ± 0.01*	4.16 ± 1.09**	0.75 ± 0.09	0.28 ± 0.12**	2.19 ± 1.18	0.62 ± 0.14	0.27 ± 0.01*	2.13 ± 0.67*
TaCFBP1-4D	42.23 ± 9.25	24.64 ± 10.39	1.96 ± 0.78**	79.26 ± 19.11	30.52 ± 3.14*	2.38 ± 1.17**	51.83 ± 0.18	25.04 ± 2.38***	2.35 ± 0.17***	91.97 ± 12.25	28.98 ± 0.81***	3.15 ± 0.82***	48.39 ± 5.6	27 ± 11.81*	1.57 ± 0.85***	84.9 ± 12.25	28.52 ± 0.81**	1.61 ± 0.51***
TaCYBP4-1A	0.39 ± 0.09	0.63 ± 0.27	1.47 ± 0.58*	0.55 ± 0.17	1.17 ± 0.12*	2.4 ± 0.05**	0.41 ± 0.03	0.78 ± 0.13*	1.77 ± 0.13***	0.67 ± 0	1.11 ± 0.03***	2.39 ± 0.04***	0.45 ± 0.05	0.69 ± 0.3	1.18 ± 0.64	0.67 ± 0	1.1 ± 0.03***	2.48 ± 0.07***
TaCYBP4-1B	0.18 ± 0.04	0.52 ± 0.22	2.68 ± 1.06*	0.32 ± 0.19	0.6 ± 0.06	3.1 ± 1.52*	0.18 ± 0	0.64 ± 0.11*	3.21 ± 0.24***	0.44 ± 0.16	0.57 ± 0.02	4.11 ± 1.07**	0.21 ± 0.02	0.57 ± 0.25	2.14 ± 1.16*	0.35 ± 0.16	0.56 ± 0.02	2.29 ± 0.81*
TaCYBP4-1D.1	3.25 ± 0.71	1.78 ± 0.75	0.39 ± 0.03*	6.15 ± 2.11	2.22 ± 0.23*	0.3 ± 0.11*	3.48 ± 0.43	1.78 ± 0.75*	0.38 ± 0.03***	6.67 ± 2.4	2.11 ± 0.06*	0.33 ± 0.09*	3.72 ± 0.43	1.95 ± 0.85*	0.41 ± 0**	5.28 ± 2.4	2.08 ± 0.06	0.23 ± 0
TaCYBP4-1D.2	0.28 ± 0.03	0.14 ± 0.06*	2.33 ± 0.21***	0.45 ± 0.17	0.16 ± 0.03*	2.2 ± 0.76*	0.31 ± 0	0.12 ± 0.06*	2.29 ± 0.17***	0.53 ± 0.19	0.15 ± 0.01*	2.37 ± 0.62**	0.29 ± 0.03	0.16 ± 0.07*	2.48 ± 0***	0.42 ± 0.19	0.15 ± 0.01	1.66 ± 0**
TaCYFBP-3A	21.41 ± 4.69	6.51 ± 2.75**	1.59 ± 0.48**	35.09 ± 12.28	8.18 ± 0.84*	1.86 ± 0.64*	22.9 ± 2.84	8 ± 1.33**	1.82 ± 0.13***	39.32 ± 14.18	7.77 ± 0.22*	2.01 ± 0.52*	24.53 ± 2.84	7.14 ± 3.12**	1.36 ± 0.53***	31.13 ± 14.18	7.64 ± 0.22*	1.4 ± 0*
TaCYFBP-3B	38.59 ± 8.45	12.49 ± 5.27*	1.02 ± 0.17**	63.51 ± 21.8	14.04 ± 1.45*	1.04 ± 0.33**	41.27 ± 5.11	14.75 ± 2.08**	1.09 ± 0.08***	69.41 ± 25.03	13.33 ± 0.37*	1.24 ± 0.32**	44.22 ± 5.11	13.69 ± 5.99**	0.95 ± 0.2***	54.96 ± 25.03	13.12 ± 0.37*	0.85 ± 0.01*
TaCYFBP-3D	23.92 ± 5.24	8.02 ± 3.38*	0.56 ± 0.06**	39.77 ± 14.47	9.39 ± 0.97*	0.48 ± 0.12**	25.58 ± 3.17	8.02 ± 3.38**	0.58 ± 0.04***	45.79 ± 16.52	8.92 ± 0.25*	0.49 ± 0.13**	27.41 ± 3.17	8.79 ± 3.84**	0.54 ± 0.07***	36.26 ± 16.52	8.78 ± 0.25*	0.46 ± 0.1*
TaFBP1-7A	13.55 ± 2.97	3.66 ± 1.54**	3.79 ± 1.5**	12.61 ± 2.77	6.33 ± 0.65*	3.21 ± 1.57**	14.49 ± 1.8	3.66 ± 1.54**	4.54 ± 0.33***	13.34 ± 1.93	6.01 ± 0.17**	4.25 ± 1.11**	15.53 ± 1.8	4.01 ± 1.76**	3.03 ± 1.64***	14.45 ± 1.93	5.91 ± 0.17**	2.17 ± 0.69**
TaFBP1-7B	24.94 ± 5.46	6.79 ± 2.86**	0.99 ± 0.39**	27.85 ± 0.16	12.74 ± 1.31***	0.62 ± 0.3***	26.67 ± 3.3	6.79 ± 2.86**	1.18 ± 0.09***	27.74 ± 0.1	12.1 ± 0.34***	0.82 ± 0.21***	28.58 ± 3.3	7.44 ± 3.25**	0.79 ± 0.43***	27.8 ± 0.1	11.91 ± 0.34***	0.42 ± 0.13***
TaFBP1-7D	51.99 ± 11.39	12.32 ± 5.19**	5.28 ± 2.09**	83.98 ± 34.63	22.5 ± 2.32*	4.94 ± 2.41*	55.6 ± 6.89	12.32 ± 5.19***	6.33 ± 0.47***	102.33 ± 36.91	21.36 ± 0.59*	6.53 ± 1.7*	59.58 ± 6.89	13.5 ± 5.91***	4.23 ± 2.29***	81.02 ± 36.91	21.02 ± 0.59*	3.34 ± 1.06*
TaHL-6A	0.13 ± 0.03	0.11 ± 0.05	0 ± 0**	0.22 ± 0.13	0.14 ± 0.01	0 ± 0*	0.14 ± 0.02	0.11 ± 0.05	0 ± 0***	0.31 ± 0.11	0.13 ± 0	0 ± 0**	0.15 ± 0.02	0.13 ± 0.05	0 ± 0***	0.24 ± 0.11	0.13 ± 0	0 ± 0**
TaHL-6B	0.16 ± 0.03	0.13 ± 0.05	0.14 ± 0.06	0.28 ± 0.17	0.21 ± 0.02*	0.18 ± 0.09	0.17 ± 0.02	0.13 ± 0.05	0.17 ± 0.01	0.38 ± 0.14	0.2 ± 0.01	0.24 ± 0.06	0.18 ± 0.02	0.14 ± 0.06	0.12 ± 0.06	0.3 ± 0.14	0.2 ± 0.01	0.13 ± 0.04
TaHL-6D	0.23 ± 0.05	0.06 ± 0.02**	0.26 ± 0.1	0.21 ± 0.06	0.1 ± 0.01*	0.25 ± 0.12	0.25 ± 0.03	0.06 ± 0.02***	0.31 ± 0.02	0.25 ± 0.02	0.09 ± 0***	0.33 ± 0.09	0.27 ± 0.03	0.06 ± 0.03***	0.21 ± 0.11	0.23 ± 0.02	0.09 ± 0***	0.17 ± 0.05***
TaLMPL1-6A	1.93 ± 0.42	0.81 ± 0.34*	0.03 ± 0.01**	3.27 ± 1.13	1.36 ± 0.14*	0.03 ± 0.02**	2.07 ± 0.26	0.81 ± 0.34**	0.04 ± 0***	3.6 ± 1.3	1.29 ± 0.04*	0.05 ± 0.01**	2.21 ± 0.26	0.89 ± 0.39**	0.03 ± 0.01***	2.85 ± 1.3	1.27 ± 0.04	0.02 ± 0.01*
TaLMPL1-6B	5.82 ± 1.27	2.47 ± 1.04*	0.03 ± 0.01**	15.12 ± 5.17	4.09 ± 0.42*	0.03 ± 0.02**	6.22 ± 0.77	2.47 ± 1.04**	0.04 ± 0***	16.3 ± 5.88	3.88 ± 0.11*	0.04 ± 0.01**	6.67 ± 0.77	2.7 ± 1.18**	0.03 ± 0.02***	12.91 ± 5.88	3.82 ± 0.11	0.02 ± 0.01*
TaLMPL1-6D	1.07 ± 0.23	0.57 ± 0.24	0.15 ± 0.06**	2.18 ± 0.48	0.91 ± 0.09*	0.17 ± 0.08**	1.15 ± 0.14	0.57 ± 0.24*	0.18 ± 0.01***	2.47 ± 0.45	0.87 ± 0.02**	0.23 ± 0.06**	1.23 ± 0.14	0.63 ± 0.27*	0.12 ± 0.06***	2.21 ± 0.45	0.85 ± 0.02**	0.12 ± 0.04**
TalMPL2-3A	0.13 ± 0.03	0.09 ± 0.04	1.17 ± 0.47*	0.18 ± 0.11	0.1 ± 0.01	1 ± 0.49*	0.14 ± 0.02	0.09 ± 0.04	1.41 ± 0.1***	0.25 ± 0.09	0.1 ± 0*	1.33 ± 0.35**	0.15 ± 0.02	0.1 ± 0.04	0.94 ± 0.51	0.2 ± 0.09	0.1 ± 0	0.68 ± 0.21*
TalMPL2-3B	0.05 ± 0.01	0.02 ± 0.01*	6.11 ± 2.42*	0.14 ± 0.02	0.04 ± 0***	6.04 ± 2.95*	0.05 ± 0.01	0.02 ± 0.01*	7.32 ± 0.54***	0.13 ± 0.02	0.04 ± 0**	7.99 ± 2.08**	0.06 ± 0.01	0.03 ± 0.01*	4.89 ± 2.64*	0.15 ± 0.02	0.04 ± 0**	4.09 ± 1.29**
TalMPL2-3D	0.05 ± 0.01	0.03 ± 0.01	1.57 ± 0.62*	0.07 ± 0.04	0.05 ± 0.01	1.43 ± 0.7*	0.06 ± 0.01	0.03 ± 0.01	1.88 ± 0.14***	0.1 ± 0.04	0.05 ± 0	1.89 ± 0.49**	0.06 ± 0.01	0.04 ± 0.02	1.26 ± 0.68*	0.08 ± 0.04	0.05 ± 0	0.97 ± 0.31**
TalMPL3-2A	0.48 ± 0.1	0.23 ± 0.1*	0.12 ± 0.05**	0.5 ± 0.09	0.31 ± 0.03*	0.06 ± 0**	0.51 ± 0.06	0.23 ± 0.1*	0.14 ± 0.01***	0.49 ± 0.08	0.3 ± 0.01*	0.06 ± 0.01***	0.55 ± 0.06	0.25 ± 0.11*	0.09 ± 0.05***	0.44 ± 0.08	0.29 ± 0.01*	0.06 ± 0**
TalMPL3-2B	0.35 ± 0.08	0.12 ± 0.05*	0.18 ± 0.07*	0.53 ± 0.07	0.16 ± 0.02***	0.17 ± 0.08**	0.37 ± 0.05	0.12 ± 0.05**	0.22 ± 0.02**	0.57 ± 0.07	0.15 ± 0***	0.22 ± 0.06**	0.4 ± 0.05	0.13 ± 0.06**	0.14 ± 0.08**	0.53 ± 0.07	0.15 ± 0***	0.11 ± 0.04***
TalMPL3-3D	0 ± 0	0 ± 0	0.11 ± 0.05*	0 ± 0	0 ± 0	0.09 ± 0.04*	0 ± 0	0 ± 0	0.14 ± 0.01***	0 ± 0	0 ± 0*	0.12 ± 0.03**	0 ± 0	0 ± 0	0.09 ± 0.05*	0 ± 0	0 ± 0*	0.06 ± 0.02**
TalMPL3-6A	7.47 ± 1.64	2.74 ± 1.15*	48.86 ± 19.37*	14.83 ± 1.55	3.41 ± 0.35***	48.71 ± 13.43*	7.98 ± 0.99	2.74 ± 1.15**	58.59 ± 4.3***	14.62 ± 1.7	3.24 ± 0.09***	55.62 ± 14.52**	8.55 ± 0.99	3 ± 1.31**	39.13 ± 21.16	15.61 ± 1.7	3.19 ± 0.09***	41.79 ± 2.55***
TalMPL3-6B	2.4 ± 0.52	0.62 ± 0.26**	26.73 ± 10.6*	1.79 ± 0.63	0.5 ± 0.05*	23.65 ± 11.56*	2.56 ± 0.32	0.62 ± 0.26**	32.06 ± 2.36***	2.01 ± 0.72	0.48 ± 0.01*	31.29 ± 8.17**	2.74 ± 0.32	0.68 ± 0.3**	21.41 ± 11.58*	1.59 ± 0.72	0.47 ± 0.01	16.01 ± 5.06**
TalMPL3-6D	4.11 ± 0.9	1.47 ± 0.62*	11.72 ± 4.65*	4.22 ± 0.31	2.19 ± 0.47**	15.49 ± 3.79**	4.4 ± 0.55	1.47 ± 0.62**	14.05 ± 1.03***	4.09 ± 0.13	2.1 ± 0.53**	16.08 ± 4.2**	4.71 ± 0.55	1.61 ± 0.7**	9.38 ± 5.07	4.02 ± 0.13	2.4 ± 0.53**	14.9 ± 3.17**
TaSAL1-4A	0.31 ± 0.07	0.2 ± 0.09	23.63 ± 2.08***	0.79 ± 0.07	0.34 ± 0.03***	21.62 ± 7.48*	0.34 ± 0.04	0.2 ± 0.09	23.14 ± 1.7***	0.75 ± 0.08	0.32 ± 0.01***	23.38 ± 6.1**	0.36 ± 0.04	0.22 ± 0.1	25.11 ± 0***	0.79 ± 0.08	0.32 ± 0.01***	16.34 ± 0***
TaSAL1-5A	0.95 ± 0.21	0.53 ± 0.22	27.76 ± 15.01*	1.85 ± 0.26	0.84 ± 0.09**	32.55 ± 8.63**	1.01 ± 0.13	0.53 ± 0.22*	35.57 ± 2.61***	2.01 ± 0.24	0.79 ± 0.02***	36.69 ± 9.58**	1.08 ± 0.13	0.58 ± 0.26*	19.95 ± 16.14	1.87 ± 0.24	0.78 ± 0.02**	28.4 ± 2.39***
TaSAL1-5B	1.47 ± 0.32	0.85 ± 0.36	18.42 ± 2.18***	3.46 ± 0.31	1.42 ± 0.15***	18.29 ± 5.46**	1.58 ± 0.2	0.85 ± 0.36*	19.06 ± 1.4***	3.61 ± 0.09	1.34 ± 0.04***	21.37 ± 5.58**	1.69 ± 0.2	0.93 ± 0.41*	17.78 ± 2.51***	3.66 ± 0.09	1.32 ± 0.04***	15.21 ± 0.24***
TaSAL1-5D	1.78 ± 0.39	1.06 ± 0.45	3.23 ± 4.79	2.26 ± 1.36	1.71 ± 0.18	3.2 ± 4.97	1.9 ± 0.24	1.06 ± 0.45*	0.45 ± 0.03***	3.13 ± 1.13	1.62 ± 0.05	0.35 ± 0.09*	2.04 ± 0.24	1.16 ± 0.51	6 ± 4.77	2.48 ± 1.13	1.6 ± 0.05	6.04 ± 5.02
TaSAL1-7A	0.16 ± 0.03	0.17 ± 0.07	1.05 ± 0.74	0.29 ± 0.17	0.27 ± 0.03	0.97 ± 0.79	0.17 ± 0.02	0.17 ± 0.07	1.45 ± 0.11***	0.39 ± 0.14	0.26 ± 0.01	1.49 ± 0.39*	0.18 ± 0.02	0.18 ± 0.08	0.66 ± 0.79	0.31 ± 0.14	0.26 ± 0.01	0.45 ± 0.52
TaSBPASE-3A	6.28 ± 1.38	2.18 ± 0.92*	0.62 ± 0.24**	7.07 ± 1.51	2.07 ± 0.21**	0.56 ± 0.27**	6.71 ± 0.83	2.18 ± 0.92**	0.74 ± 0.05***	7.72 ± 0.58	1.97 ± 0.05***	0.74 ± 0.19***	7.19 ± 0.83	2.39 ± 1.04**	0.49 ± 0.27***	8.06 ± 0.58	1.94 ± 0.05***	0.38 ± 0.12***
TaSBPASE-3D	2.91 ± 0.64	0.72 ± 0.31**	1.09 ± 0.43*	3.55 ± 0.88	1.08 ± 0.11**	1.24 ± 0.61*	3.11 ± 0.39	0.72 ± 0.31**	1.3 ± 0.1**	4.09 ± 0.13	1.03 ± 0.03***	1.64 ± 0.43***	3.33 ± 0.39	0.79 ± 0.35**	0.87 ± 0.47**	4.02 ± 0.13	1.01 ± 0.03***	0.84 ± 0.27***
TaSBPASE-3B	1.73 ± 0.38	1.13 ± 0.48	0.96 ± 0.19*	2.14 ± 0.15	1.76 ± 0.18*	1.01 ± 0.16***	1.85 ± 0.23	1.13 ± 0.48	1.04 ± 0.08**	2.09 ± 0.08	1.67 ± 0.05**	1.09 ± 0.04***	1.98 ± 0.23	1.24 ± 0.54	0.88 ± 0.22**	2.05 ± 0.08	1.64 ± 0.05**	0.93 ± 0.17***
TaVTC4-4A	2.01 ± 0.44	1.84 ± 0.31	0.12 ± 0.01*	2.99 ± 1.79	2.57 ± 0.26	16.27 ± 3.95**	2.15 ± 0.27	1.84 ± 0.31	0.12 ± 0.01***	4.13 ± 1.49	2.44 ± 0.07	17.12 ± 4.47**	2.31 ± 0.27	2.06 ±		3.27 ± 1.49	2.4 ± 0.07	15.43 ± 3**
TaVTC4-4B	3.23 ± 0.71	3.66 ± 0.61	0.16 ± 0.09**	3.94 ± 1.07	4.47 ± 0.46	0.4 ± 0.19**	3.45 ± 0.43	3.66 ± 0.61	0.21 ± 0.02***	4.63 ± 0.32	4.25 ± 0.12	0.52 ± 0.14***	3.7 ± 0.43	4.08 ±	0.11 ± 0.1***	4.44 ± 0.32	4.18 ± 0.12	0.27 ± 0.08***
TaVTC4-4D	2.38 ± 0.52	2.87 ± 0.48	1.37 ± 0.17*	3.01 ± 1.12	3.53 ± 0.36	0.19 ± 0.09*	2.54 ± 0.32	2.87 ± 0.48	1.47 ± 0.17**	3.75 ± 0.68	3.36 ± 0.09	0.25 ± 0.07***	2.73 ± 0.32	3.2 ±	1.27 ± 0.01**	3.36 ± 0.68	3.3 ± 0.09	0.13 ± 0.04**
# All data are presented as mean ± SD. Asterisks indicate statistically significant differences: *p < 0.05, **p < 0.01, ***p < 0.001.
