# Supplementary material
Source: Research Square preprint supplement (doi:10.21203/rs.3.rs-9570638/v1)
Supplement: Supplementary file 6 [file e2d5b5a922f545bb7275e334.xlsx]

## Sheet: Sheet1
Table S3. Identification of FIG superfamily members in the wheat pan-genome.
Variety	Genomic			Non-genomic	Total
	AA	BB	DD	UU
Triticum urartu	12				12
Triticum dicoccoides	14	11			25
Aegilops tauschii			13		13
ChineseSpring	14	12	13		39
Alchemy	13	20	12		35
Arinalrfor	14	12	14	3	43
Jagger	13	12	14		39
Julius	13	12	14		39
Kariega	10	10	12		32
Lancer	13	12	14		39
Landmark	13	12	15		40
Mace	14	12	14		40
Norin61	13	12	14		39
Renan	14	13	10		37
Stanley	13	12	14		39
SyMattis	13	12	14		39
Cadenza					39
Claire					38
Paragon					34
Robigus					39
