# Supplementary material
Source: Research Square preprint supplement (doi:10.21203/rs.3.rs-9570638/v1)
Supplement: Supplementary file 7 [file f0be5b90719177d1e4914840.xlsx]

## Sheet: Sheet1
Table S2. An overview of the FIG superfamily across species.
Category	Species	Gene number	Gene name	Protein sequences
Protist	Porphyra umbilicalis	7	Rna10752	MAGRGDPPRSMRGAAAGLDVDAPPRRGGGGGGGGGGFVRLGESSGPGLAGLGGGLAGLSLGGRGRGGGDMVGGERPPSPPPSPSGLHPSAGRTLTTHLFAEAQKHVHRLEEGVHFSSEGASSGDSLMDLVTLLSAVTFSVKTVGAMVRCLGLPRSAGAKNVREANEAANETWIKSLTASRACSLLVSEECEEPIAVSDPGTGQYAVVFDPLTGLAEPPTQDMGAIFGIFRQLTAAGEEPSLMDVLQPARQLVAAGYAVYGSSTMLVLTTGHGVDGFTLDPSLQEFVLTHPRLQVPFAGETYSINEGYASSFDERTKLMLETLKEEPTLDGAPRTCRYLGSMVPDVHRTLLYGGVFIYPAHAGRPMGRLKLLYEAGPLAFVAEQAGGEASTGRKPILDIQ…
			Rna5601	MFAFVTGTAGLLSGAAVARGTGLARIQPRVTRTLATAAVKPGVAAALRMVATPSKREQFVDMDESPMTLTRFMIQEAVESLDSEHLRDMQNLMASIQMACKKISSLVSRAGISNLTGYEDGGSINIQGEEQKKLDVLSNDVLKHALKWQGGKLGIIASEEEDEPVMVDEMASGNYIAVFDPLDGSSNIDAGIATGTIFGIFAESSSCLPSDTDGGDLDDATLTCLANTMQPGSSLVAAGYCMYSSSCMMVLTTGAGVNGFTLDPQIGEFVLTHPNITIPKRGKIYSFNEANEPAWDPILREYISNLKTGKNVSSTAYSSRYIGSMVADVHRTLMYGGIFGYPADKKNPNGKLRLLYECAPMSFLVEQAGGMSTTGKERVLDVIPNAVHQRLPLILGSAD…
			Rna5958	MDTAAHPAGNGASGTTLISHLLESLAKRSNYLEEGVIHTNVDSSLSKGDSLADLVTLLTSITLAVKTVGSMVRRMGLPRAEAQSVTDINKIANDTWIRELTASDACCVLVSEDLDDPVVVEESHRGNYAVVFDPLTGLADPPAQDMGAIFGVFRQLTQETEPGVEDVLQPARNLIAAGYAVYGAATMVVLSYGSGVHGFTLDPTLSEFILTHENMQVPYSGRVYAINEGFSSKLDPKTQQMLKALKDEPALDGSTRTCRYIGSMVPELHRTIIRGGVYIYPAHEARPQGRFKLLYEAGPLAFVVEKAGGQASTGTRAILDIQPESLHHRVEVYMGSEDDINLCTSHFRKAPWGRGPSADPMYSLRRSKSIDAQMKAGTEEGDSGGPLVNSPSIGAGGED…
			Rna639	MDKTLSVTGGSVRLGDIVAIARDAGAAIMQIYTGDEAEWETKTKTDASPLTAADLTANALICERLGALDPAFPIMSEENKQLDFDARAGWTYYWCVDPLDGTKEFLKRNGEFTVNIALMRNAPAAGGEDAPHGAARPVLGVVYAPATGVAYFAASGVGAHVAPAPDGAAEAPLAAASFKESDAGLTLVCSRSHMDDRTAAFVASYTDAATASMGSSLKFMLIAEGKAHVAGRDAACDTHVGGGGRTGPCTSPKPFNTHPHGRARAAHDAFGGTAG
			Rna9426	MPPWPCIRKEGGALSTSHARQRRMARTWGHRLPGRLPLLDRRGHAALHDVPAGQSPLAAPRRPPRRRVHRPSPCQRVTSSPSALPPPVDALHLLPHVLASTVAPPSPSLSAPYPRPAAPPTVAAMAFVAPAAAASVTARVAARPATVGARATAFAGAAVAAPARRSVLRAAPAALRMAQTGETLEEFLAGSDPKLVKCVAAMFASCKEVAYKIRTASCDKMACFNDFGDEQLAIDMLADKIIFDNLEASGVVATASSEEVPKEVTITEGGAYSVAFDPLDGSSIIDTNFTVGTIFGVWPGDKLVGTTGRELVAGGMVLYGPRTTVTLAMEGKEGAHEFLLIDDFSSRHGSWVHTATFTAVNEGKLYAPGNLRAAEDNPGYAELIDYYRKEKFQLRYSGG…
			Rna9908	MAAFVASAGCGRVGNPATAARVSTSRHAAPLAAAAATPRPSVPTMVAPTPTKQEQFVCMDESPMTLTRYFMQAANENLDEEHVVDLQNLMASIQMACKKIASLVSRAGISNLTGYEDSGSINVQGEEQKKLDVLSNDVLKHALKWRGGKLGIIASEEEDEPIMVDELASGNYVAVFDPLDGSSNIDAGIATGTIFGIFAESAGCLASDWEAKINEEELTCLYNVLQPGSNLVASGYCMYSSSCMMVLTTGRGVQGFTLDPQIGEFVLTHPSITIPPRGTIYSVNEANSPAWDPVLLAYIKSLKDGSNASGKPYSSRYIGSMVADVHRTLMYGGLFAYPSDTKNVNGKLRLLYECSPMSFLIEQAGGIATTGKERVLDVIPSSVHQRVPLVLGSPEDVQE…
			Rna9957	METLKSNIASIVGGDATGGKAPTGLEGLDSVTLTRFVLHGQKSHAEAKGDLTMLLAAVQLACKVTETCVRRAGIANLYGLAGSGNVQGEDQKKLDIIANDTFKVNIQSSGKCCVMVSEEEDLAILCDRTYNTGKYAIAFDPLDGSSNIDANVSIGSIFAIYKINDPAAITTPQEAAKEILQPGREMVCAGYAMYGSATNLVISMGEGVHGFTLDPSLGEFVLTDPNMRIPSRGKIYSVNEGNARMWDPATTEYIKSLKYPEDPDKKAYALRYIGSMVADIHRTLLYGGVFIYPADAKSPDGKLRLLYEAAPMAFLIHHAGGKSTTGKEDILDVIPTGIHQRVPVYMGSPEDVADFEAVSTKLANSV
Algae	Dunaliella salina	5	Dusal.0083s00013.1	MDGLASKPLWQEELKIAIGAATDAGNLIRSGFSVRSKDVEDKKNTSDLVTETDVKSEELVFSRIRTAFPSHVLIGEESSVSSGPDALTDEPTWMCDPLDGTTNFVHSYPNVCVSIALVVKKQVVVGVVYNPITEELFTATKGSGAFLNGRPIRCSGAQDMKRALLATEIGVTRDETTFHAVFLRISKLVQAMQSVRCTGSCALNLCSVASGRIDAFYEIGFGGCWDVAAGALIVSEAGGALIDPAGGPFGLMSRRVLAGTPAIVPQVSAILAACPTSEHEPPAPASS
			Dusal.0106s00008.1	MAFVLPRSLQQQGLAGQVRTNSTAPSAVHPVRQASKQVCVPAVSSPAAANGPQPSGRAASVVPKAVAMTPESKTLGRRSSKYEIFTLTTWLLREEQKGNVDGELATVIASIALACKQISSLVNRAGISNLTGLDGGENFSGEDQKKLDVVSNEVFANCLRSSGRTGVIASEEEEVPIAVEESYSGNYIVVFDPLDGSSNIDAGISVGSIWGVYEPSEECPIDAIDDPDKMMEQCVLNVCQPGKDLKCSGYCLYSSSTTIVLTVGHGVWGFTLDPAIGEFVLTHRDVKIPEKGKIYSFNEGNYNLWNDDLRAYMEHVKDPAAHNGKPYSARYIGSLVGDFHRTLLYGGIYGYPGDKKNPNGKLRLLYECAPMSFLAEQAGGKGTTGKRPCLEIMPEKVHQ…
			Dusal.0277s00016.1	MGSTFSKVDGQPDYTVELQFSSSIPIQSVVAAAEAAGQSILQIYKSEASKWEVQLKSDSSPLTRADFAANQIICDELTRLTPHIPIVSEENTVKPYDVRQNYQYHWLVDPLDGTKEFLKRNGEFTVNIALVTNGVPVLGVVHVPCQAKTYWAVKGKGAWLQTSQTQTQFQAAEFG
			Dusal.0344s00011.1	MMLTKRCSVLASTHSTQLKRTSVFSRSAPASPKLSLWHSACMPGSYQQPALLTTAKHGQHLGRPLSLCAGAPSPDVPLATSGPEPLPELLRAATAAAQDGAKVISAAVDQPRKITMKGATDLVTETDRLSEEAVLRVINKAYPDHAVLGEEGGVSGNTQSEYLWVVDPIDGTTNFAHSYPSFAVSVGVLHRGTPIVGCVVEFLGGPHAWGTRTFTAHKGGGAFCNGHPIRTSTNPEVTRSLLVTGFGYDHGPAWRSNMELFKELTDVSQGVRRLGAAAVDLCHVALGIVDATWEYQLKPWDVTGGCVILLEAGGRLTTMDGQPYSVFSRSMLASNGPLHPQLLQYMQPKTEALLRQGFDLSEWYVPKGYNLK
			Dusal.0670s00008.1	MATMLAQKQMAQAAGLQRASAPAVPKVGRTKMPVVARAGSSSFQGTAVAPKLRQTAGRRQAARASRRTAVQTQAKLGDTLNEFLIDATQDIKLRTLVTSLSECIRTIAYKVRTASCAGTACVNSFGDEQLAVDMVADKLLFEACRYSHVVKLACSEEVPEPVDVGGSGFSVAFDPLDGSSVIDCNFAVGTIIGIWPGDKLDGITGRDQAAACMGVLGPRTVFVLAIKGYPGTHEFLLQDDGKFVHVKETTEIAEGKMYAPGNLRATSDNPQYEKLLNYYVQEKYTLRYTGGMVPDVFQILVKEKGVFTNVTSPSTKAKLRILFEVAPLGLMIENAGGYSSADGKQISALDVPISNCDQRTQICFGSYGEVKRFEEFMFGSAPRFQDAAAAK
	Chlamydomonas reinhardtii	9	PNW70525	MRTQVLQARAPRPAACRIRAQRSSRAALRPVAAMALPADFKDSYVDLAHSLADAAAQVTRKYFRTSFDVECKSDDSPVTIADKQAEVAMREIIERTVPEHGIFGEEHGLKWGSGAGSKYMWVLDPIDGTKSFITGKPLFGTLISLVYEGSPILGIIDQPITKERWLGVVGRPTTLNGQPLRTRPCPDVKLAYLYATTPHMFSGESEVAFNRLRDSVRIPMYGCDCYAYGLLAAGHADLVVEADLKPYDYMALVPVVQGAGGVMSDWRGRPLVWQPTPGAVDLKSGWPGEVCAAGDPALHKKAIDILAWKH
			PNW74770	MAATMLRSSTQSGIAAKAGRKEAVSVRAVAQPQRQAGAASVFSSSSSGAAARRGVVAQATAVATPAAKPAAKTSQYELFTLTTWLLKEEMKGTIDGELATVISSVSLACKQIASLVNRAGISNLTGVAGNQNVQGEDQKKLDVVSNEVFKNCLASCGRTGVIASEEEDQPVAVEETYSGNYIVVFDPLDGSSNIDAGISVGSIFGIYEPSEECPIDAMDDPQKMMEQCVMNVCQPGSRLKCAGYCLYSSSTIMVLTIGNGVFGFTLDPLVGEFVLTHPNVQIPEVGKIYSFNEGNYGLWDDSVKAYMDSLKDPKKWDGKPYSARYIGSLVGDFHRTLLYGGIYGYPGDAKNKNGKLRLLYECAPMSFIAEQAGGLGSTGQERVLDVNPEKVHQRVPLFI…
			PNW80057	MGGGLSVLRGEETPDYSMEIQLKVELQVEDIIATAQAAGRAILQIYNSEASTWEVQMKSDASPLTRADREANAIICQALQNISPHIPIISEENKLTPHAVRQKFQYYWLVDPLDGTKEFLKRNGQFTVNIALMCGTAPVMGVVDVPCQGKTYWAVKGKGAWLRSAEGQRRIQAADFAFEDKGLKIVASSSHLNKETEEFIALFQSPELVQVGSSLKLLMVAEGAAHIYPRLAPTCEWDIAAADIIVREAGGAVLQAGTQDNKGNPLQDWKEELVKEAAVVYNKEDVLNPYFVVFGKRKAPISTGSS
			PNW80990	MPARTADAAEQKRAAAEVMDGEGAANAGPDYSIVQRNLALELVRVTEAAALASGRWFGKGDKNAADQAAVDMMRKVLNSVAMDGVVVIGEGEKDEAPMLYCGERIGDGSMFPKVDIAVDPLDGTSLTAAGRNGAISVIAVAERGALFDPGPCMYMEKLAVGPQVDPESVSLDYSVRHNIKWVARALDKPVSDVTVLMLDRPRHADLIRQCREAGARIRLISDGDVAGAIEVAKAGGPVDMMLGIGGTPEGVIAACALKCMGGHIQGRLWPRDDKERAAALERGYDLNKILLMDDLCKGDDVFFAATGVSDGDLLRGVRYHSGGASTNSIVMRCKSGTVRFVETYHKWTKPSVTNISLDEDSDEAGGRSGGGKSGGGKGGKGGGGHGHHYGGAPHGRGAG…
			PNW82312	MPVPEALKDSPHHRYLEVAIDAAVAAGDVIKGSFKGPKQVEEKLNHADLVTATDKAAEDLIFGRIRAAFPDHAFIGEESAAAAGGAAALTDAPTWMVDPLDGTTNFVHGFPFVCTSIALVVGRRVVVGVVYNPVLGELFAAAAGGGACLNGAPLATSAATELAGALMGTEVGTARDEETVDSTFGRVRALTSKMRSVRCGGSCALGLCNVAAGRLDAFYEINFGGCWDSAAGALMVSEAGGTVLDPAGGPWDVMSRRVLAAGTRQLGEAVAAVLAGCKLSSREVGPPPAGGVVSLERQEAAAAAAAKAQE
			PNW85419	MMRQKVAGAIAGERRSAVAPKMGRAATAPVVVASANASAFKGAAVTARVKRSTRAARVQSRRTAVLTQAKIGDSLAEFLVEATPDPKLRQLMMSMAEATRTIAHKVRTASCAGTACVNSFGDEQLAVDMVADKLLFEALKYSHVCKLACSEEVPEPVDMGGEGFCVAFDPLDGSSIVDTNFAVGTIFGVWPGDKLTNITGREQVAAGMGIYGPRTVFCIALKDAPGCHEFLLMDDGKWMHVKETTHIGEGKMFAPGNLRATFDNPAYERLINFYLGEKYTLRYTGGMVPDVFQIIVKEKGVFTNVTSPTTKAKLRILFEVAPLALLIEKAGGASSCDGKAVSALDIPILVCDQRTQICYGSIGEVRRFEEYMYGTSPRFSEKVAA
			PNW86423	MHAISSRNLARRPAPAARRATAHRQVLVRAAGPKVAAEDLLATAKKAAQLGAEIVMAAADKPRNISRKEGTDIVTETDKASEEAVVAAIRAAFPNHAVLGEEGGVLGDVSSDYLWCVDPLDGTVNFAHGYQSFCVSVGVLRHATPVAGCVIEFLGGPKTWTTRTFTAARNQGAFVDGQQIFVSRVKELRDAVVTTEAVYYEDMWPQLTVLQKEFTERCRGVRMSGAAAANMCHLAMGCIDAYWQYNLKPWDVAAGAVILEEAGGRLTTADGLAYSVFDRSLIATNDALYEKVLALTEPQTSRMLQEGVSLSTWCVPKGYRVRSGAQMDR
			PNW87113	MLVGKQNARLAPHRSPIVLARVPSAKAGEAKAAPADAVALNELMEVAILAAEKGAEVVREALDRPRSISFKGATDLVTETDKASEDAVLAVLRKHYPRHALLGEEGGVSGDTDSSYLWCVDPLDGTTNFAHSYPAFAVSVGVVRGVTPVAGCVVEFTGGPHAWATRTFAAHTGRPTTCNGKPVRVSQVSDVRRSLLVTGFGYEHDEAWAANMELFKEFTDVCQGVRRLGAAAVDLCHLSMGVVDGYWEYRLKPWDMAAGIVIAQEAGATITTMDGRPFSVFERSMLASNTLLHQQIMDKTDPKTRGLLAANVDLSPWFVPPGYDTSRR
			PNW88453	MASAKEAVRLASRLCQEVQRQLSAEERVDKKDDSPVTVADYGAQVVVAWTLQRADPSTRLSMVAEEDSTELRTPAGRPMLDRITALVNSVVAAAAPGEVLSPEQVLDIIDLGASQGGPSGRHWVLDPIDGTRGFVGMRQYSVCLGMLQDGEVVLGVLGCPNLPQGPVGDDDGATGSAQRLSGDADVGCLFFSERGQGAWVEPLQNAGDAAPAQVRVAEVTEGAEARFMESVESRHSSHSINAALARELGVVRPPLRMDSQVKYGLLSRGCGTIFMRFPPATYKEKIWDHAAGFVIVEEAGGRVTDAAGVRLDFSKGRFLALDRGIIAAPPALHEKLVAAAAKVAPKA
	Ostreococcus lucimarinus	8	ABO95160	ELETALDAVRLASTLCQEVQAQLMRMDEQAETKEDRSLVTLADYAAQAIIVWRISQDFPDMTLVGEEDAEALTEGGEGGAATLAKIVALVNKTLKTHIGDDAVELSSQDVVSAINKGKSTGGAKGKHWILDPVDGTLGFVRGDQYAIALALMDEGDLKVGVMGCPNMPKQGDVLEFETSYSYGFSPRLVSKMLAGDSLGWYKGCIFTAVRGHGSYMFPVDEELNFEPSKVTVSGAFDPQKAKFTEPVMKANSSQGFTAAVATNLGIECKPLRIYSQVKYGSVARADADVFMKFPKAGYREKIWDHAAGVILVEEAGGRVSDAGGAPLNFAGGRYIEGLDRGIIAASSALHERLLDAVAKSWSSSQL
			ABO95382	SLENILGKHCADEKLRKVIVEMLDCCADITEALRSALVTVEGSANTFGDAQLSVDVIADNLMWDCVKSSETVAYGASEEEPEVVQCNPNGEYTVCWDPLDGSSIVDNNWAVGTIIGIWDSTSGTGADGLLGATGRDQRTSLVALYGPRTTVIVALDDGVYEFSYGCTPEGCQLPDGSFEPWICSRMNIKINETSKIFSPANMRAAQDTEGYKKLLDYYMDERYTLRYSGGLVPDVYQQFTKNQGVFSNPTSAKSPAKLRLAFEAAPFGLLVEKSGGKTSDGVTGGSVLDVQINTVDQRTALCIGSAKEVERFNETVLG
			ABO96166	MDHERELRVAERAARVAGAEIARAWTRDRSNETSVEYKGAVDLVTATDKLCEDLVLSALREAFPEDDVVGEETHAASGAKELSKTTSVRCWYVDPLDGTTNFVHGYPFSCVSVGLCEGGEPTVGVVFNPISDEMFTAVRGRGAFLNGKKISCSAVRTLGKALIGTEIGVHRDGKTVDAIMGRVRALVEKSRSVRCSGSCAMNMCGVAMGRLDGFFEIGFGGPWDCVAGTIIVREAGGVVFDPSGDAFDIYARRVLCANGNIGDEFVKALSEVPDGPGEPQRPEI
			ABO96248	MVVLISRRGAKSLIRGLERRGGSNASGDSQQKLDVVANDIFKRHLTECGGVKYYASEEDDTPVVLNVDGGYVVCIDPLDGSRNIACNVPVGSIFGVYRAIEGASAEENAVQPGREQVAAGYAHYSGATTLVLACGDEGPAVEYTLFDGEFAVANKRMSCPPRGQVYSLNDARFDDWPEGLKSYINDIRNGRGESGSQYSARYICSLVGDAHRTLIYGGWCGNPRPHLRVVFEAAPLAFVARAAGAASSDGIRCSDEATNGVETILDKKPTTLHERSPLFLGSCEDIAELVLRGDVRQDGSKTYSV
			ABO96306	MGDASDVPRVVVPEAYVRFAEALADAAGGTTTKYFRARGVEVEDKKDSSPVTIADQQAEAVMRAMVTREYPTHAIFGEEHGIELGAGGSSEWTWVFDPIDGTKSFITGKPLWGTLIALLHDGEPVLGILDQPVLKERWIGVSGRVSTMNGEPISVKPCESVGDAYMYSTTPLMFEGMNAARYETLARKVKIPMYGCDCYAYGLLAMGFADLVVEADLKPYDYMALVPIVKGAGGYMTDWKGNALRFTADRASLESGEFQGEVIACGDAKVLRAAVATLSKTLF
			ABO97968	MAKACVRIGGFVRRAGLKDVKAFVEGKNGAVNVHGEEQAALDDAAHEVCVKELIQGGRCAWIASEESEDIVTANVDGRIAVVFDPLDGSSNIECGVGVGTIFGLVDVGAESSPEHVYARPGRDMSTVGYVLYGASMVLVLSFMSEDAHGGVCAFTYDADRDAFVLTKRDIRIPESGNVYSVNQANYKKWDDATRAYIDECASSKSLRYIGSMVADVHRTLLYGGTFHYPACSSNAQGKLRAVYECFPMAAIIERAGGLAISGANDSVLSFVPSTAHSRMPFHCGSARDIERLDEILSSEVRAGKKGRVSSPSPR
			ABO98944	AARAVRLAGALCRKMQFELRTNEKVSKSDDSPVTVADFAAQAVVSHVLGVARPDVGLVAEEDARSMREPAGAKLRARVTAVVNDALEGVVERRLSEEEVMDAIDRGATDGGASGSFWILDPIDGTKGFINGRQYAIALALMEDGEVTGGVLGCPNMPSEKIPRGATEIPTAAPGVIFVAYKGRGTTVGAFDAEHPLRDGAKITTNKVASSSEATYMESWGDSIVADHGFTNSLSAAMGVTAPPVRIDSMAKYGALARGDTNMYLRFPPASYREKVWDHAAGAIVVQEAGGVITDGAGNPLDFSKGRFLDIDIGIVATS
			ABP00991	MRARAALGESLSAHLASASARGDIDADLAIALNSVAIACKRVRALVARAPIAGNTGAAGGSNASGDEQKKLDVIANDVFVETLRACGRASVIVTEEEDTPIAVERASGYIVTFDPIDGSSNIDACVTTGSIFGVYAPGACEIKDTDSAEETLANCLTNSLQSGEALVAAGYCMYSSSCVFVLTTGDGVAQYDFDENVGEFVCSKERVTIPDGDKMQRIYSGNNGNVNLWAPELKDYVAHLQKGGSDGGKPWTYRYIGALIGDFHRTLLYGGIWLYPPDTSAPNGKARLLYEIAPISMIAEQAGGMSTRGPKANESVLDVVPKHIHEKSPMFVGSKSAVQDLQEFLKKY
	Botryococcus braunii	8	Bobra.0022s0248.1	MATFTANICSSTAQAACKQATRPAKNTPKMLAVPRLSSSAQALSSARSSSFAGAALHAGQAVSRKSSRAVLTTRAKVGDSLEEFLVEATPDPKLRQVLMSLSEAVRTIAFKVRTASCGQVGCANSFGDEQLAVDVLADKLLFEALKFSGVCKYACSEEVPEPVDLQGSGFSVAFDPLDGSSIVDTNFTVGTIFGVWPGDKLTGITGRDQAAAGMGIYGPRTVYCIALKDAPGCHEFLLQDDGKWLHVKETTDIGEGKMFSPGNLRATFDNPEYEKLISYYVGEKYTLRYTGGMVPDVFQIIVKEKGVFTNVTSPSTKAKLRILFEVAPLGLLVEKAGGASSCDGKRVSALDVPITSHDQRTEICYGSVNEVKRFEEYMYGKSERFAAVTV
			Bobra.0144s0055.2	MSSGHLLLGEVVRNVFLQEYRVYPVSSRRRLDAEHSGRLSTTPGKLWDRLLHQQRHRLHPRLAPQMSIHLFTLTNWLLAEEQLDNLDGELATVLSSIATACKQIASLVNRAGISNLTGLAGQANVQGEDQKKLDVVSNLVFCNALRASGRTGIIASEEEDEPVAVEETFSGNYVVVFDPLDGSSNLDAGISTGSIFGIYEPSEECNIGDMDDPIEMMKNCVMNVCQPGNALLAAGYCLYSSSVHFVLTIGKGVWGFTYDTLVGEFVLTHPNMQIPAEGKIYSFNEGNYKSWDPRLQKYMDSLKDADKWGGKPYSARYIGSLVGDFHRTLLYGGIYGYPGDKKNPNGKLRLLYECAPMSFIMEQAGGKGSTGVQRVLDVNPDKVHQRVPLFIGSPKEVEY…
			Bobra.0209s0026.1	MVAAGYCLYGSSCAMVISIGEKPSVFTLDPSLGEFVLTNAQITIPEKGAIYSVNEGNAALWDEPITNFVQECKFPPEGKAKSARYVGSMVADVHRTLLYGGVFIYPADSKNPRGKLRLLYECFPMAYIIEHAGGRAIAGRVGSLDVAPQSIHERCPIFLGSKADVDRIEALIVSSAKTFQL
			Bobra.0364s0011.1.p	MLRCLRSSSHGHFRTCSFLCLNSFPSVSVRRHHRKGRLNPCCAEGTPLRAKGFVNSFTSSSSLERSALEVALSRSSMSDYSEELQRAIDAVRLACVLCETVQLKLKTKEWAEKGDASPVTIADYGAQALVAWSLQQGDEANAFSLVAEEDSKDLQGEAGAVMRARITELVNATLAQSGVSASPLSEGDVVSLIDAGGSPGGPKGRHWVLDPIDGTRGFVGLRQYAVCLGMLDGGQLALGVLGCPNLPQAPITDLDGESGAAKRVGEAGVGCLFTAVRGQGAFQQPLSLSFGRESAPQPLKVKDSSDFSQQRFMESYESGHSDFSFTAAVAKEVGITRPPLRLDSQAKYGVLARGDADIIMRFPHKGYREKIWDHAAGALIVTEAGARISDAGGNPLDFS…
			Bobra.0392s0030.1	MWGRCSLSGSLVRGENMVFVPRPMPNRVGHKVTRVNAIATPEAPPAASMPSKDVPGPDYQNFKQRNLALELVRVTEAAALAAGRWFGKGDKNAADQAAVDMMRKVLNTINMDGVVVIGEGEKDEAPMLYCGERVGAGGEPRVDVAVDPLDGTTLTSQGRSGAVSVIAVAERGALYDPGPCMYMEKLAVGPAVNPHMVSLQYSIARNLRAVASALNKPLGDVTVILLDRPRHADIIKEVREAGARIRLISDGDVGGAIEVAKPGSPVDILLGIGGTPEGVIAAAALKCMGGSIQGRLWPRNADERERAIKAGYKLEEILYTDDLVKGDQVFFAATGVSNSDLLQGVRYYSGGASTNSIVMRAASGTVRIIETQHRWARPSVTNLDGPNYNGNGGHDQFTL…
			Bobra.118-2s0005.1.p	MLGSWERTCQMQAPCLTSKFNPVPRRSCIRSIPCHVSISAAQVPGRRVSNGIGCFPGRPLNFRRSRLDRQICAAIKATEAELVSQTLLLEVAEKAAAAGKEIILEAVDKPRNIQFKGDTDLVTETDKASEEAILKVITEAFPDHAILGEEGGVVGNTASDYLWCVDPLDGTTNFAHGYPSFAVSIGVLRHATPVAAVVVEFCGGPGAWTSKTYTASRNGGAFMDGKPICVSRCHDLRRSLLATGFGYEHDAAWSKNLELFREFTDVTQGVRRLGAAAVDMCHVALGILDGYWEYRLKPWDMAAGVLIVEEAGGLVTTTDGLAFSVFQRSILASNGALHGAIQEKTEAATAQLRDQGVDLAPWFVPKGYRVSAGHQLE
			Bobra.176-1s0062.2	MESLAGETLDKIFDLEDIRLGRVLTALGLAVSDISDFLRVAETTKTASTNPFGDQQLKVDIKCDKCVFDRLLECGEVGIASSEEQPLEVGLTTGATYSVAFDPLDGSSIVDANFSVGSIFGVWGAGPLVGRTGHDLVAAAYAVYGPRTTLVVACTQVGQAGAGVTEVVLTDGGKWLVRRRNIRIGEKKIFAPANLRAAADNEAYRQLVQDVYIAQQYTLRYTGGLVPDVHHILTKGGGVFCNPASPNAPPKLRLLYEVLPLAFVVEAAGGKSHASDGSALDIRITSTDLRSIVSLGSPAEVAKTIFALQNRLPGEPPSVPLPSPLPYGVG
			Bobra.9-2s0099.1.p	MTDRLVALQFDTGEFVTVNCFFVRRLGGRGLLSYRSSGIALSRLTTQRAPRSTSSAAGKPMSEINIQKCMEVAVSAAIEAGGVIREGFHNRKKVELKGKVDLVTDSDKRCEALILSAIQSNFPDHKFIGEEGSSAQGFTNDLTDEPTWMVDPIDGTTNFVHAFPFVCVSIGLAVNRQVKVGVVYNPILEETYTAVKGQGAFLNGEQIHVSETADLGDALVATELGISRDPETVEAIFGRVQKLAENVRGLRAAGSCALNMCSVAKGRLDSYYEIGVGGPWDMAAASLIVAEAGGTLLDPAGGAFNLMSRRVLATNGQLGPRVAAVIGGCPLGPSEPGPLP
Bryophyta	Marchantia polymorpha	9	Mp1g03160.1	MDHAADAMRTDLMTLTRHVLNEQSKYPEARGDLTILLNHIVLGCKFVCSAVNKAGLAKLIGLAGETNVQGEEQKKLDVLSNEVFVKALTSSGRTNILVSEEDEDAIVVPEKLRGRYCVVFDPLDGSSNIDCGVSIGTIFGIYMLEEGQAGTVEDVLKPGTAMVAAGYCMYGSSCTLVLSTGEGVNGFTLDPSLGEFILTHPLIRIPKKGKIYSVNEGNAKNWDEPTTKYVEKAKFPTDGSSPKSLRYIGSMVADVHRTLLYGGIFLYPADKKSPNGKLRVLYEVFPMSFLVEQAGGQAFTGKQRALELVPTKIHERSPIFLGSYDDVEEVKDLYAKYS
			Mp1g13130.1	MMGCHYSGGLVLEGAMRLRTRILPYQFGPCPVSGRGRWKIRLEGTRVPADRCLRASLSPEHRRSVHFEAVATQVETLALKLAKQAGALIREKSGKALQVDTKEVRYDLVTEVDKACERLLKCEVRNVFPEHDWVGEETATELELKKLVTNSLSAPWTWIVDPIDGTLSFVDGVPLSVVSIGIAYRNSMEIGVIYNPYHDELFHARRGQGAFLNGNPIKVLLPETELEDTTVTFGIPSKPDKRVAMLKDVTKVALHCRSLKALGSAALHMSYVAAGRFGCFFENDLKPWDYAAGWLIIEEAGGRVTDLEGKPQTLLGGPILASNGGIIHDRMVELLNLD
			Mp1g28700.1	MAVDLEMLNKYVAVAEEAAVMAGKLIQVSFYKHKTVEHKGKVDLVTETDKACEKIIFDHLSKAFPTHKLLGEEESSLSGKINAITDEPTWIVDPLDGTTNFVHSFPFVCVSIGLTIGKVPVVGVVYNPILDELYTATKGGGAFLNGQLIMASDQTDIGNALLATEVGTARDVQTVDESTNRINAALFKVRSLRMSGSCAMNLCGVACGRLDIFYEIGFGGPWDVAAGVLIVQEAGGLVFDPSGSPFDIMSHRVCSTNSHLKEAVVDVFRGHC
			Mp3g22450.1	MAIAVGSSLNLCRLSSSETRCASRRSCGSDVSRVVPARSCGSFGGASLKFVGRHHRENAVRMSRIRASVSQSLDDYRVGATNREDVPMKDLLQCLEEASAKGREVVMAAVDKPRSVDYKGATDLVTDTDGRSELAILEVVRKYFPDHLILGEEGGVSGDESSDYLWCIDPLDGTTNFAHSYPSFAVSIAILLRGKPIAASVVEFVGGPFCWDTRTYIASAGGGAFCNGNQIHVSNKDEVERALFVTGFGYEHDEAWATNIDLFKEFTDVSRGVRRLGAAAVDMCHVALGIVEGFWEYRLKPWDMAAAVLIVEEAGGKVTRMDGGDFCVFDRSVLVSNGILHEKLLDRISPPTEKLINDGFDFSQWYKPTGYVSEV
			Mp3g22710.1	MASMVAASSALGASCSLAAVPSQATTSSNNAAQAVILRSAKLGGRSSSILGQSLAGLSVKSVAHKAVASRSRVASTRAELGDSLEEFLFKNTKNINLRQLMLSMGLAIKKISFKVRTASCGATACVNTFGDEQLAVDMLANKVLFEALLHSHVCKYACSEEEPNLVDMGGPTEGGFSVAFDPLDGSSIVDTNFTVGTIFGVWPGDKLTGVTGREQVAAAMGIYGPRTTYVLCLAEVPGTHEFLLMDDGTWQHVKETTTIGEGKLFSPGNLRATYDNPEYEKLINYYVSEKYTLRYTGGMVPDVNQIIVKEKGIFTNVISPTTKAKLRLLFEVAPLGLLVEKAGGYSSDGKISVLDKVVVNTDDRTQVAYGSRNEIIRFEEALHGTSRVAALVGASA
			Mp7g09460.1	MITSASTELAVLVEREGIRMAASSVCGALRGSVSLQEHLSRFASKKKNFDEKAFPIVYQAISASSLPYRPRLSLAPYPRQREDPLPRLLISSVPANSGLEPVSGCTRISLLGFSPPACHSSELAVVSSTWDIDVKAGGSSQHENLLWMCGDEQISQECSLEKEIYADRLVDDRVAEDPSREMTNRGLAESLARVDQSPTKCTSRLEDNISAIGHASNLASESYRSAAPELDFHASSTTNGAAWKDTHSTNSSSAKSQNNAHKFPALSAGDFTPISAGGHDNHKYEMELEVAVKAVQLSCILSQRIQQRVLHNEENTDFKKDRSLVTVADWGVQAVVSWVLSQAFQGKEIPMIAEEDTTGLRGREKIDLLQRVVGAVNECLQHAGIVGVSPPERPLGAID…
			Mp7g15520.1	MTTVTFAKSLVAGGALRLRPVTVVENERGAVSHGALFRDQVRFEVSCSARLPFSTTAETTRLSLPPRMSCLPPWRNLGVEGATSAVLSSRLPRNRGSVMGTAAVEDVAASYLNASLSDNADMEANFVEVGNKLADAAGEIIRRYFRTGFDIITKDDLSPVTIADRAAEEAMTSIIKDCFPSHAIYGEENGLHMPEEGADYVWVLDPIDGTKSFVTGKPLFGTLIALVHKGVPILGIIDQPVLRERWIGKAGERSTLNGVPIASRASCTSLKNAFLYTTSPHLFAGAKEEAFIRIRDKVKTPLYGCDCYAYGLLAAGHVDLVVESGLKPYDFLALVPVIEGAGGTITDWSGDKLRFWPNSDHPSCDETGMEVVAAGSDDLHKAALDALEWNSS
			Mp8g16560.1	MTQVIGGSPMRLCAASWRSPGFVSRTHTVVSISVQRNVRPGRLVTRAVQTVQVDISQEIKDIEAVAVRLAREAGALILAKSGRATQVDRKASRSDLVTEVDKACEHLIQSEVKAVFPQHHWLGEETFTEAQLDRLGDGPKGADYTWLVDPIDGTLNFIGGLPFASVSIAVARGSTLQVGVVYNPFIDELFTARKGEGAYLNGESISALPRETELEDAIVTLGFNSKPERRKLMLQEISKVGPHCRAIRALGSAALHISYIAAGRVGCFFEHGLKPWDIAAAWLILEEAGGYVTQMNGEPLPLVGGSILATNGGKVHERMIEILN
			Mp8g17290.1	MQALGARRAFLRSSFPCSRSSSSWKALGNCRAPSIVRLGRRGVGAIRSMAYEDDVRLAIKAVSLASRLCQAVQRKLVANETQAKADQSPVTVADYGSQALVSWVLERELPPGTFHLIAEEDSEDLRAEDGSEMLKRITQLVNETIAADGSFGSTVLSEDDVLTAISRGDSPGGPSGRYWVLDPIDGTRGFVRGDQYAVALGLLDNGEVVAGVLGCPNLPLASIAANGAASDDKAVGCVFAASRGAGTVMQSMDGSREAQRVYVSSVDDSKLAAFCESFEAAHSKQGLTANIARILGVSAPPIRIDSQAKYGAMARGDAVIYLRFPHAGYREKIWDHAAGLIVITEAGGEVFDAAGKPLDFSMGRFLDLEKGIIATNPSLRSAVLAAVQTAIKEEESALK…
	Physcomitrella patens	21	Pp3c11_19670V3.4	MQRTARDVGRKALTEIVRQRNLHGVSALWAAIRSSAGELSSGGRGFSSLGDVRRSPEGVFINYAHGKSTGLPSTKWKDRLSTTFSMEVPKLAHLATRTKHSAALALDDDKGYDSSSGMDEFVEVGHMLADAARIVVMKYFRSNFQIIDKEDLSPVTIADRETEAAMWSIISRCFPDHAIFGEEGGLAMPEGGSDYVWVLDPIDGTKSFITGKPVFGTLISLLYKDTPVLGIIDQPVLGERWVGVQGQATTLNGRRIKTRSSTSLLKDAYLYTTSPHMFAGETEDAFVRVRNEVKIPLYGCDCYAYGLLSSGHVDVIVEHGLKPYDYLALVPVVEGAGGTITNWNGESLKWFPHIGEHSIGVLAAGSRSLHKAALSRLIGEQC
			Pp3c13_15690V3.1	MATNSLLRVCSASIGDGRQLCRNRCISQDTLQVVFRYDIMNSSLTEFLPSSWRWVPPASVSHATGSRVNPLHSGGTMRRVLYGMADTRSGERRGRCTGAFNAGPDTGANKVKGEGRVDTKEGEEEELVVRLSEMGKFWQEDQEKKFREAHDNGALSMESREGTDFSKFPSDGTESEEGRPEELQQSSENGRSVSGEQVSQSASSTSSTISNSRPYGHTYIQGSLSGSGNAPLQEPRSDYRPQSSSEPVFLEVIPEDLATILPDPSQTVGLFDGQQPLSVIEQAQREADVEPVKEWDRWPTGLQESQIKIKTDLQGKYGREMAAAIQAVQLACMLSQRVQERLLRKEEKAGSKKDKSLITVADWGVQAVVSWVLSQSFQGEAIPMVAEEDTKGLRGQSGI…
			Pp3c13_1900V3.1	MDHAADAMRTDLMTITRHVLNEQSKFPEARGDLTILLNNIVLGCKFVCSSVSKAGLAKLIGLAGETNVQGEEQKKLDVLSNDVFINALVSSGRTNVLVSEENEDAIFVEPSKRGRYCVVFDPLDGSSNIDCGVSIGTIFGIYMLKEGASGTVEDVLQPGTAMLAAGYCMYGSSCTLVLSTGAGVNGFTLDPSLGEFILTHPDIKIPKKGKIYSVNEGNAKHWDGPTTKYVENAKFPKDGSSPKSLRYIGSMVADVHRTLLYGGIFMYPGDKKSPKGKLRVLYEVFPMSFLVEQAGGQSFTGKQRSLDLVPAHIHDRSPIFLGSYDDVEEIKALYAAESA
			Pp3c13_1900V3.4	MDHAADAMRTDLMTITRHVLNEQSKFPEARGDLTILLNNIVLGCKFVCSSVSKAGLAKLIGLAGETNVQGEEQKKLDVLSNDVFINALVSSGRTNVLVSEENEDAIFVEPSKRGRYCVVFDPLDGSSNIDCGVSIGTIFGIYMLKEGASGTVEDVLQPGTAMLAAGYCMYGSSCTLVLSTGAGVNGFTLDPSLGEFILTHPDIKIPKKGKIYSVNEGNAKHWDGPTTKYVENAKFPKDGSSPKSLRYIGSMVADVHRTLLYGGIFMYPGDKKSPKGKLRVLYEVFPMSFLVEQAGGQSFTGKQRVSAPTLLLIRVSKFCQLLNCLQSFSQHSCQL
			Pp3c14_5280V3.1	MSSSVSTISTISSTSLVFSPREKSWAVASDKQICRSELSMPSIQFKHPIKVSCSGVEATLSSSRSISSCPASWTADSSAGRRNFAVVSRQRYFRASRATGMAVEEAISDDSMAQFVDVAHKLADAARVITLKYFRAKFQIIDKSDSSPVTIADRSAELAMRELLAEQCPSHSIYGEEWGLTIPEGGSDYVWVLDPIDGTKSFITGKPVFGTLIALLYNGVPVLGVIDQPVLQERWLGIQGKVTTLNGVEIQTRLTASLKDSYLYTTSPHLFAGDAEAAFIRVRNEVKVPLYGCDCYAYGLLAAGHVDLVVESGLKPYDYLALVPVVEGAGGVITNWNGEKLRWLPEMGEVGIEIIAAGNASVHGAALQALAGNGPSTTS
			Pp3c15_5590V3.1	MLKEVVHRSHHLWQCFPRHLHCHDWSPVNSKARSRSGRGSVSWRKPLFCMASYHRDVVLATNAVRLASRLCQTVQRGLLTQETQTKSDKSPVTVADYGSQALVNWSLAREFPPGTFSMVAEEGSEDLRTEAGAPMLERITQLVNDAIASDAALDVAPLSKEDVLEAIDWGNSEGGSNGRHWVLDPIDGTRGFVRGDQYAIALGLLDNGKVVAGVLGCPNLPMGSIANGIPANSSEPVGCLFVASLGAGTTVEPLDGSGEPKRVHVSDVEDTAIATFCESYESAHTMQDLTANIAGTLGVKAPPVRIDSQAKYGAMARGDAVIYLRFPHFGYREKIWDHAAGAIVITEAGGEVFDAAGEPLDFSRGRWLDLDTGIIATNKELKPVVLSAVQKCVKDLKIP…
			Pp3c18_4950V3.1	MNYLFLFCICFIPLLSVRWSRVSVKPLDSTPPKFQPSPSPIRSGTKPPAPPSPSMFARMLGFRKPPPPSPPPKSFFQQSVVVAPPPAVQGKSSWFRSRRKTPSMESKRSPTPLSPSLPASVVRPPLRMDANAVAQVDTNEVVTMTGFLGTEGSNVDTDLVVLMTHIQAACKHIASVLASPTELQTTISGADATHGAGRDAPKPLDIVSNNIIKAALRSSGKVAAIASEEDDQPIWFGEGPYIVVFDPLDGSRNIDASIPTGTIFGIYHRLPEADHLPTEEKAFVNVMQRGERQVAAGYALYSSATIMAISVGSGLHGFTLDYNLGEFVYSHHDIRIPERGQIYSVNDARYFDWPAGLRKYIDTVRQGKGQTRKQYSARYICSLVADLHRTIMYGGIAMN…
			Pp3c19_12890V3.1	MATTQAILSATLAIAPASSCETSSRSPASTKTCLSVAGSSLHGSVAGLGAGKQIVSVQRKSVAVRAAVAAETAAPKQQAKSQYDITTLTTWLLKKEQAGVIDGELTIVLSSIALACKQIASLVQRAGISNMTGLQGAANIQGEDQKKLDVISNEVFSSCLRSSGRTGIIASEEEDTPVAVEESYSGNYIVVFDPLDGSSNIDAAVSTGSIWGIYKPNEECLTNLGEEPTIDEIAENCVVNVCQPGSNLLSAGYCMYSSSVILVLSVGDGVYGFTLDPLYGEFVLSHDNIQIPKSGKIYSMNEGNYALWDDNLKKYVDSLKDPGTSGKPYSARYIGSLVGDFHRTMLYGGIYGYPRDSKSKNGKLRLLYECAPMSYLAEQAGGKGSDGHQRILDIQPEQV…
			Pp3c19_6880V3.1	MGLHQSEELESCLAVAVEVAKKAGQIIKDGFHRAKAVEHKGLVDLVTETDKACEDVIFTQLKESFPSHELIGEETASVNGIPVLTDSPTWVIDPLDGTTNFVHSFPFVCVSIGLVIDKVPVVGVVYNPLLDELFTGIKGQGAFLNGQRIHASNQEHIGNGLLATEIGVKRDKQTVDRTSNLINYFLYKVRSLRLSGSCAMNLCGVACGRLDMFYELGFGGPWDVAAGTLILREAGGLVFDPSGGEFDMMSHLVAASNGHLKGALVEGLVAHM
			Pp3c21_18140V3.1	MAVAMGARTLTSASTSLVLPKSLSKGAASALLGHVKLWTSVKVGGSRAMCTNSSGVRRGGIARSAVSEVTASKIGAISTEGLPVKALMEVLDAAGHRGAEVIMAALDKPRSIDYKGKADLVTDTDRNTELAILEVVREKFPDHLILGEEGGVSGDSNSDYLWCIDPLDGTTNFAHGYPSFAVSIAVLYRGRPLAATVVEFAGGPFAWVTRTFTASAGGGAFCNGQRIHVSSNDMVERSLLVTGFGYDHDAAWETNLELFKYYTDTSRGVRRLGAAAVDCCHVALGIADSYWEFRLKPWDMAAGALMVEEAGGKVTRMDGGPFSVFDRSVIVSNGAIHDKLLEKIQPATEKLIADGLNFSQWLKPTGYNSDV
			Pp3c21_5760V3.1	MGLQHYADLESCLSVAVDAAKRAGQIIANNFNTAKVIEHKGMVDLVTETDKACEDLIFKLLKSTFPSHELIGEETSAENGTPLLTDAPTWIVDPLDGTTNFVHRFPFVCVSIGLVVNKVPVVGVVYNPILKELFTAVQGKGAYLNGKLIHASSQDKIGNSILATEVGTTRDKQTVDRTTNCINNLLFQVRSVRLSGSCAMNLCGVACGRLDMFYETGFGGPWDVAGGALIVQEAGGLIFDPSGKDFDLMSRRIGASNGHLKQPLVTALTSYV
			Pp3c21_8340V3.1	MAASILRVFSNWSPSTSLLQPLRGPKLRHAALWNSQTHSIRRLCVRSLSVQDEGNAIESLAMDLALKAGTMIKDKSGLALQVDTKESRFDLVTEVDKACEDFLRTQVQEKFPNHFYLGEETFTDQEFERLRSGLKDSEWTWIVDPIDGTLNFVAGMPLSVVSIGVALGQNMEIGVVYNPFNNELFYARRGQGAYLNGMPIKVLPHDTELEDSTVSVGFPSKPEWRLRMLEDIGKVAPNARSVRALGTAALHMSYVGAGRIGCFFEHNLKPWDVAAARLIVEEAGGKVTDMNGNVLPLTAGSILASNGGILHDRIVQLVSD
			Pp3c22_22950V3.1	MNYFFLFCICFLPLLSFRWGRVAEVPTKPEVATPSTRSGTKPVNAPSPSIVARLVSSLRKPPSPPSPVRSIFQQPLSSIVFSTRGTKAPSPPPPSTWFSPPARRQKPPPAESKPRPSPMPTFLTPPFTRPPSRAMPNVVAQAGADEVVTMTAFLGTEGSNVGVDLVVLMTHLQTACKHISSILASPTELQATLKGADSVHGVGRDARKPLDLVSNNIIKAALRSSGKVAAIASEKDDRPVWLGGGPYVVVFDPLDGSRNLDATVPTGTIFGIYRRLPEADHLPTDEKAFANVMQRGERLVAAGYVLYSSSTIMAISVGSGLHGFTLDYTIGEFAYSHHDIRIPERGQIYSVNEAKYFAWPVGLRRYIDNVRQGKGQTRKQYSARFIGSFVADLHRTIMY…
			Pp3c22_4630V3.1	MGLQQCEDLETCLAVAVDVAKKAGQIIKDGFHIAKAVEHKGMVDLVTETDKACEDLIFTQLKTSFPSHELIGEEESSESGIPLLTDAPTWVVDPLDGTTNFVHKFPFVCVSIGLVINKVSVVGVVYNPLLEELFTAIQGQGAFLNGERIYASSQEHIGNGLLATEIGTKRDKHTVDRTTNLINDMLYKVRSLRLSGSCAMNLVGVACGRLDMFYELGFGGPWDVAAGTLILREAGGLVYDPSGGEFDMMSHLIAASNGHLKQSLVDCLVDYL
			Pp3c24_11070V3.2	MNVYLFLFLLCFAPLASHRYGLMKSVTTLYESSDPREPPSPPPPPARSLLYRSVTYLRKIIFQKPPKLNRKPPPPPPPSPDYSRFAPPPVVKAPHTPSPVSRWFRRSASARDRRASLQRTYYQRAPPLSSYTAARNAEGVITMMSFLGTEGSNADVDMVVLMAHIQAACKHIAAILSSPRELQYNYEPYFEGGKRDDSRSLKSISNYIFQLALRNSGKVAAISSEEDEAPIWFGDGPYIVVFDSLDGFEDFDELTPTSTMFSIYHRIHEADHLLLEQKATINVMQRGDRLVAAGYTIYSSSTMMCFSLRTGLHGFTLDHDVGEFVLTHPDIQIPERGNVYSVDDGRYFDWPPGLRHYVDNIRQGQGQSSQRYSARHVSSLVADLHRTILFGGIVMNPRT…
			Pp3c3_1090V3.1	MDHAADAMRTDLMTITRHVLNEQSRFPEARGDLTILLNNIVLGCKFVCSSVSKAGLAKLIGLAGETNVQGEEQKKLDVLSNHVFINALVSSGRTNVLVSEENEEAIFVESSKRGRYCVVFDPLDGSSNIDCGVSIGTIFGIYMLKEGASGTVEDVLQPGTAMLAAGYCMYGSSCTLVLSTGAGVNGFTLDPSLGEFILTHPNIKIPKKGKIYSVNEGNAKHWDGPTTKYVENAKFPKDGSSPKSLRYIGSMVADVHRTLLYGGIFMYPGDKKSPKGKLRVLYEVFPMSFLVEQAGGQSFTGKQRALELVPAHIHDRSPIFLGSSDDVEEIKALYAAESA
			Pp3c3_21240V3.1	MSITSLLRVGSVNIGEDGRHICKIGYVSYDHLRAALRRDVVNFPLAEFMISSWRCVPSANLLRLAGSRLDSFQNWSTKRRVSNGVVSTRYGGRIGCCTETSNVGPATGANKVKEEVSVEVKEGREEEWVVRVSELDKFWQDNQDGGVRKGHDNGAPPSQTPKGLTSAVFSSVEGQIEQGRPGELRQTSEDGRPISEENNRNDYNLQSSVEPVFLEVIPEDLVTIHPDPSQTVGLFDGQQPLRVVEQAQSEAYVEPVKEWDWWPTGLRENQIRSKPDVQGKYGREMAAAIQAVQLACMLSQRVQERLLRNEEKARSKKDKSVVTVADWGVQAVVSWVLSQSFQGEELSMVAEEDTKGLRGQSGVDMSQRVVNAVNECLREASAVGIAPPKQPLRSYEVLK…
			Pp3c5_5150V3.1	MATTMAATAAGSAVSSFAKLSSSAVAGAGVQNAAFPRSAAATSLGGKASSLYGASMPYARNAVSVKASSTSRNTLTRAELGDSLEEFLAKATTDKNLARLLVCMGEALRTIAFKVRTASCGATACVNTFGDEQLAVDMLADKLLFEALRHSHVCKYACSEEEPILQDMEGEGFSVAFDPLDGSSIVDTNFTVGTIFGVWPGDKLTGITGRDQAASAMGIYGPRTTYVVAINGFPGTHEFLLMDDGKWQHVKETTEIKEGKLFSPGNLRATFDNADYEKLINYYVSEKYTLRYTGGMVPDVNQIIVKERGIFTNVTSPTTKAKLRLLFEVAPLGLLIENAGGYSSDGKQSVLDKVVVNTDDRTQVAYGSRDEIIRFEETLYGDSRLKAELAAATV
			Pp3c6_22140V3.1	MATIMAAAVAAGSTVSTFAKASSSSSVLGRGAQAAAPLRSVACASLGGKSSSLYGAQVINARNAVAQKASSTNREALIRAELGDSLEEFLAKATPDKKLARLLVCMGEALRTIAFKVRTASCGATACVNTFGDEQLAVDMLADKLLFEALRYSHVCKYACSEEEPVLQDMEGEGFSVAFDPLDGSSIVDTNFTVGTIFGVWPGDKLTGITGRDQAASAMGIYGPRTTYVIAINGFPGTHEFLLMDDGKWQHVKETTEIKEGKLFSPGNLRATFDNADYEKLINYYVSEKYTLRYTGGMVPDVNQLIVKERGIFTNVTSPSTKAKLRLLFEVAPLGLLIENAGGYSSDGKQSVLDKQVVNTDDRTQVAYGSRDEIIRFEEMLYGDSRLKAELAALKA
			Pp3c7_15760V3.1	MAATQAVHQVLCSSAAVATTSSEVQSCKGGLTANSLSLLPGSSFHGSCAGLRAQNSRAVTDPRQAAGARAAISVEPTSLPTAKKGQYEITTFTTWLLKQEQAGVIDGELTIVLSSISLACKQIASLVQRAGISNLTGLQGVANIQGEDQKKLDVISNEVFSSCLRSSGRTGIIASEEEDTPVAVEESYSGNYIVVFDPLDGSSNIDAAVSTGSIFGIYKPNEECLTDLGENPTIDEVAQNCVVNVCQPGSNLLSAGYCMYSSSVILVLSVGHGVYGFTLDPLYGEFVLSHEEIKIPKSGKIYSFNEGNYALWDDKLKKYVDSLKDPGPSGKPYSARYIGSLVGDFHRTMLYGGIYGYPRDSKSKNGKLRLLYECAPMSYLAEQAGGKGSDGHQRILDIQ…
			Pp3c7_6620V3.1	MYTAVRTIRRKALVGFARQRELHGVSAPRDGVRTLAEELSSGVRASSSIVDDTVPSKRFYVTDAPGKPTVFHATRQQERLSSTLAGEVPKLAPVTTRSEHSAAVAVDDEKGYESSSSMEDFVEVGHKLADAARAITVKYFRRGFQIIDKEDLSPVTVADRETEAAMCSIITRHFPGHAIFGEEGGLTMPEGGSDYVWVLDPIDGTKSFITGKPVFGTLISLLHKGSPVLGIIDQPVLGERWVGVKGQATTLNGRRVRTRSSTALLKDAYLYTTSPHMFTGQTEDAFVRVRNEVKIPLYGCDCYAYGLLSSGHVDVIIEHGLKPYDYLALVPVVEGAGGTITNWSGESLKWLPEIGEHSIGVLAAGTRSLHKSALSHLIGVQQSCAMT
Fern	Selaginella moellendorffii	19	EFJ04554	MDHQADAQRTDLMTITRFVLNEQSKHPEARGDLTILLSHIVLGCKFVCSAVNKAGLAKLIGLAGETNVQGEEQKKLDVLSNDVFVKALSSSGRTNVLVSEELEEAIFVEASHRGKYCVVFDPLDGSSNIDCGVSIGTIFGIFLLDHDNAGSNDDVLKPGSEMVAAGYCMYGSSCTLVFSTGSGVNGFTLDPSLGEFILTHPDIKIPKKGKIYSVNEGNAKNWDEPTRLYVENAKFPKDDSSPKSLRYIGSMVADVHRTLLYGGIFMYPADKKSPFGKLRVLYEVFPMSYLVEQAGGQAFTGKERALDLVPKHLHERSPIFLGSYDDVEEIKKLYSATIA
			EFJ05816	MDETRKTSDATLDGFVSLAHELADAAAKITLKYFRTRIEVIDKLDLSPVTIADQAAEEAMRALILQRFPSHAVFGEEGGLTMPDSIAEYAWVLDPIDGTKSFITGKPVFGTLISLLHNGVPILGIIDQPVLKERWLGVAGQATVLNNREISTRSCHSLSSAYLYHAWYTTSPHLFDKLSEQAFARVREEVKVPLYGCDCYAYGLLAAGHVDLVVESGLKPYDYLALVPVVEGAGGVITDWQGNKLTWKPDFDEELIKTNVIAAGDSRVHRAALGRLDCQAS
			EFJ05994	MLGNFDSLREISRNARGWSVGSLAFPRARSWRPSAVSSETTGNIDSRAQPRPQCLEHNRDGNDKKITRGVYAQELEVAARAVQLGCMLAQRVQERILRKEENAGSKDDKSLVTVADWGVQAVVSWVLSQAFGEEVSIIAEEDTKGLKGMNGIQTLQRVVAVVNECLSQASVVGLTPPSRKLGTIEVLRAINKGNSEVRSSRSWVLDPVDGTLGFVRGDQYAIALGMIEDGRVVLGVLGCPNYPMRPQWLNYHQKYYRLASKIAPPPPGKWHKGCVLTSAKGAGQAWMEPLVWNSDGSFLLNPPRVVAVSPVDDPAQATFCEPVEKANSSHSFTEGVADSLGLRKRPLRVYSMAKYAAIARGDAEIFMKFARAGYKEKIWDHAAGVLIVEEAGGVVTDAG…
			EFJ13317	MEAGDELDGFLEIAVDAAKQAGQIIAGSFHSHKNVEHKGKVDLVTETDKACEKLIFELLQKHFPDHKASSLDFTTSLCSMEKFSRLTDEPTWIVDPLDGTTNFVHGFPFVCVSIGLTIGKVPSVGVVYNPILNELFTAVKGRGAFLNGSKITASSQDEIYKALLATEVGTKRDKATVDETTDRINNLLYKIRSLRMTGSCALNLCGVACGRLDIFYELGFGGPWDITAGVVILQEAGGRVFDPSGGPLELMSQRIAATNSHLQDAFLEALHKD
			EFJ14792	MEAVTLACGLTKSVQRKLLENETQSKTDNSPVTIADYGSQAVVSWALERQLPAGTFSMIAEEDSEDLRKEDGKAMLQRITELVNSIPSKDALLSSEDVLCAIDRGKAEGGAQGRHWVLDPIDGTKGFLRGEQYAIALALLDQGSVVLGVLGCPNLPLSGLSDDGSSPVGCLFTAVRGAGTTLHPIDGSLQPRKVRVSDLSDPALAAFCESYESAHSKHDLTSGIAKMLGVTASPIRMDSQAKYGAMARGDAAIYLRFPHKGYREKIWDHAAGSIVVEEAGGVVVDAAGRALDFSKGRYLDLDTGIIATNPSLLTAVLTAVETCVGSKSFL
			EFJ18090	MDHQADAQRTDLMTITRFVLNEQSKHPEARGDLTILLSHIVLGCKFVCSAVNKAGLAKLIGLAGETNVQGEEQKKLDVLSNDVFVKALSSSGRTNVLVSEELEEAIFVEASHRGKYCVVFDPLDGSSNIDCGVSIGTIFGIFLLDHDNAGSNDDVLKPGSEMVAAGYCMYGSSCTLVFSTGSGVNGFTLDPSLGEFILTHPDIKIPKKGKIYSVNEGNAKNWDEPTRLYVENAKFPKDDSSPNMVADVHRTLLYGGIFMYPADKKSPFGKLRVLYEVFPMSYLVEQAGGQAFTGKERALDLVPKHLHERSPIFLGSYDDVEEIKKLYSATIA
			EFJ19025	MLGNFDSLREISRNARGWSVGSLACPRARSWRPSAVSSETTGNIDSRAQPRPQCLEHNRDGNDKKITRGVYAQELEVAARAVQLGCMLAQRVQERILRKEENAGSKDDKSLVTVADWGVQAVVSWVLSQAFGEEVSIIAEEDTKGLKGMNGIQTLQRVVAVVNECLSQASVVGLTPPSRKLGTIEVLRAINKGNSEVRSSRSWVLDPVDGTLGFVRGDQYAIALGMIEDGRVVLGVLGCPNYPMRPQWLNYHQKYYRLASKIAPPPPGKWHKGCVLTSAKGAGQAWMEPLVWNSDGSFLLNPPRVVAVSPVDDPAQATFCEPVEKANSSHSFTEGVADSLGLRKRPLRVYSMAKYAAIARGDAEIFMKFARAGYKEKIWDHAAGVLIVEEAGGVVTDAG…
			EFJ21550	MAYLGSSSGLDENLAIVILHLQGAVKEIAALLASPEAILSSDSTSFSSSPSVAPSSGRDAPKPLDIISNELLKKSLESSRKVAVVASEEEDLPVWINDHGPFVAVFDPLDGSRNIDASIPTGTIFGIYRRLEEADKLPVEEKAQLNVLQCGSRLVASGYALYSSATILCLTVGQGTQIFMLDRSCGEFKLVKPDVKVPERGQIYSVNDARYFDWPQGLRRYIDDIRRGKGQFPKKYSARYVCSLVADVHRTILYGGIAMNPRSHLRLVYEGNPLGFLVEDAGGKACDGKRRILDIQPVELHQRLPLFLGSSEDVLELETYGDVQQVVNPGYEV
			EFJ22250	MGAPRAELGDSLEEFLATSTKDKSLARLLTCMGEAIRTISFKVKTASCGATACVNTFGDEQLAVDLLANKLLFEALRFSHVCKYACSEEDPELLDMGGPVEGGFSVAFDPLDGSSIVDTNFTVGTIFGVWPGDKLTGVTGNDQVAAAMGIYGPRTTYVMAIKGHPGTHEFLLLDDGKWQHVKETTSIGEGKLFSPGNLRATFDNPQYEKLINYYVTERYTLRYTGGMVPDVNQIIVKEKGVFTNVTSPSTKAKLRLLFEVAPLGLLIENAGGFSSDGHQSVLDKLVVNTDDRTQVAYGSKAEIIRFEETLYGSSRLAKVAAAKLA
			EFJ22736	MATPLRFRASAIGECFARQHSSRLPAQRSGAGRSGTRRHCSAITASRSTGVLNSRIGAARSGSLPFEELLAGAEAAAKLGSQVVLDALDKPRRIDYKGATDLVTDTDKKCELAVLQEIQRRFPDHLILGEEGGVIGNSSSDYLWCVDPLDGTTNFAHGYPSFAVSVAVLYKGRPAAATVVEFAGGPFCWVTRTFTSSSGKAAISFHLLNFSNQVERSLLVTGFGYDHDEAWATNISLFKDFTDVSRGVRRLGAAAVDMCHVSLGIVEAYWEYRLKPWDMAAGVLMVEEAGGKVTKMDGGEFSVFDRSVLVSNGVIHPKLLDRISPATKTLVNQGLDFSQWYKPEGYSCN
			EFJ23220	MDHAADAQRTDLMTLTRFVLNEQSKHPEARGDLTILLSHIVLGCKFVCAAVNKAGLAKLIGLAGDTNIQGEEQKKLDVLSNEVFIKALCSSGRANVLVSEENETEIYVETSRRGRYCVVFDPLDGSSNIDCGVSIGTIFGIYMLKDGKAGVVSDVLRPGKEMVAAGYCLYGSSCMLVLSIGNGVHGFTLDPALGEFILTHPVMRVPRKGKIYSVNEGNAKHWDEPTKKYVEIAKFPTGGSVPKSLRYIGSMVADVHRTLLYGGIFMYPADKKSPNGKLRLLYEVFPMAYLVEQAGGQAFTGKERALDVVPKKIHERSPIFLGSFEDVEEIKSLYHASGLL
			EFJ23927	MAYLGSSSGLDENLAIVILHLQGAVKEIAALLASPEAILSSDSTSFSSSPSVAPSSGRDAPKPLDIISASFYRSSRKVAVVASEEEDFPVWIDDHGPFVAVFDPLDGSRNIDASIPTGTIFGIYRRLEEADKLPVEEKAQLNVLQCGSRLVASGYALYSSATILCLTVGQGTQIFMLDRSCGEFKLVKPDVKVPERGQIYSVNDARYFDWPQGLRRYIDDIRRGKGQFPKKYSARYVCSLVADVHRTILYGGIAMNPRSHLRLVYEGNPLGFLMEDAGGKACDGKRRILDIQPVELHQRLPLFLGSSEDVLELETYGDVQQVVNPGYEV
			EFJ24662	MEAGDELDGFLEIAVDAAKQAGQIIAGSFHSHKNRRIKLARSLFLSSCKSISRITRQALSTLQLPFFIGEETSALNGTAELTDEPTWIVDPLDGTTNFVHGFPFVCVSIGLTIGKVPSVGVVYNPILNELFTAVKGRGAFLNGSKITASSQDEIYKALLATEVGTKRDKATVDETTDRINNLLYKIRSLRMTGSCALNLCGVACGRLDIFYELGFGGPWDITAGVVILQEAGGRVFDPSGGPLELMSQRIAATNSHLQDAFLEALHKD
			EFJ25223	MDHAADAQRTDLMTLTRFVLNEQSKHPEARGDLTILLSHIVLGCKFVCAAVNKAGLAKLIGLAGDTNIQGEEQKKLDVLSNEVFIKALCSSGRANVLVSEENETEIYVETSRRGRYCVVFDPLDGSSNIDCGVSIGTIFGIYMLKDGKAGVVSDVLRPGKEMVAAGYCLYGSSCMLVLSIGNGVHGFTLDPALGEFILTHPVMRVPRKGKIYSVNEGNAKHWDEPTKKYVEIAKFPTGGSVPKSLRYIGSMVADVHRTLLYGGIFMYPADKKSPNGKLRLLYEVFPMAYLVEQAGGQAFTGKERALDVVPKKIHERSPIFLGSFEDVEEIKTLYHASGLL
			EFJ25699	MGAPRAELGDSLEEFLATSTKDKSLARLLTCMGEAIRTISFKVKTASCGATACVNTFGDEQLAVDLLANKLLFEALRFSHVCKYACSEEDPELLDMGGPVEGGFSVAFDPLDGSSIVDTNFTVGTIFGVWPGDKLTGVTGNDQVAAAMGIYGPRTTYVMAIKGHPGTHEFLLLDDGKWQHVKETTSIGEGKLFSPGNLRATFDNPQYEKLINYYVTERYTLRYTGGMVPDVNQIIVKEKGVFTNVTSPSTKAKLRLLFEVAPLGLLIENAGGFSSDGHQSVLDKLVVNTDDRTQVAYGSKAEIIRFEETLYGSSRLAKVAAAKLA
			EFJ26537	MKRELIDRFFFPGVWQSVQRKLLENETQSKTDNSPVTIADYGSQAVVSWALERQLPAGTFSMIAEEDSEDLRKEDGKAMLQRITELVNSIPSKDAVLSSEDVLCAIDRGKAEGGVQGRHWVLDPIDGTKGFLRGEQYAIALALLDRGSVVLGVLGCPNLPLSGLSDDGSSPVGCLFTAVRGAGTTVHAIDRSVQPRKVRVSDLSDPALAAFCESYESAHSKHDLTSGIAKMLGVTASPIRMDSQAKYGAMARGDAAIYLRFPHKGYREKIWDHAAGSIVVEEAGGVVVDAAGRALDFSKGRYLDLDTGIIATNPSLLTAVLTAVETCVGSKSFL
			EFJ33185	MATPLRFRASAIGECFARQHSSRLPAQRSGAGRSGTRRHCSAITASRSTGVLNSRIGAARSGSLPFEELLAGAEAAAKLGSQVVLDALDKPRRIDYKGATDLVTDTDKKCELAVLQEIQRRFPDHLILGEEGGVIGNSSSDYLWCVDPLDGTTNFAHGYPSFAVSVAVLYKGRPAAATVVEFAGGPFCWVTRTFTSSSGGGAFCEGNPISVSNTDQVERSLLVTGFGYDHDEAWATNISLFKDFTDVSRGVRRLGAAAVDMCHVSLGIVEAYWEYRLKPWDMAAGVLMVEEAGGKVTKMDGGEFSVFDRSVLVSNGVIHPKLLDRISPATKSLVNQGLDFSQWYKPEGYSCN
			EFJ34465	MDETRKTSDATLDGFVSLAHELADAAAKISLKYFRTRIEVIDKLDLSPVTIADQAAEEAMRALILQRFPSHAVFGEESGLTMPDSIAEYAWVLDPIDGTKSFITGKPVFGTLISLLHDGVPILGIIDQPVLKERWLGVAGQVTLLNNREISTRSCHSLSSAYLYTTSPHLFDKLSEQAFARIREEVKVPLYGCDCYAYGLLAAGHVDLVVESGLKPYDYLALVPVVEGAGGVITDWQGNKLTWKPDFHEELIKTNVIAAGDSRVHRAALGRLDCQAS
			EFJ36627	QAGLAKLIGLAGETNVQGEEQKKLDVLSNDVFVKALSSSGRTNVLVSEELEEAIFVEASHRGKYCVVFDPLDGSSNIDCGVSIGTIFGIFLLDHDNAGSNDDVLKPGSEMVAAGYCMYGSSCTLVFSTGSGVNGFTLDPSLGEFILTHPDIKIPKKGKIYSVNEGNAKNWDEPTRLYVENAKFPKDDSSPKSLRYIGRQDYSKFYIEFSVFKNIFMVADVHRTLLYGGIFMYPADKKSPFGKLRVLYEVFPMSYLVEQAGGQAFTGKERALDLVPKHLHERSPIFLGSYDDVEEIKKLYSATIA
	Ceratopteris richardii	10	Ceric.06G067900.1.p	MAATSASASSAIASSTCASRNAGTQLGSSSCSLRLPSSASSNLKHSCSLLGQRLEASIGVRKTRSSPAGNNGVRAELGDTLEEFLTKSCKDKGLARLMMAMGEALRTIAFKVRTASCGATACLNTFGDEQLAVDLLANKLLFEALRYSHVCKWACSEEDPVPLDMEGEGYSVAFDPLDGSSIVDTNFTVGTIFGVWPGDKLTDITGRDLAASAMGIYGPRTTYVLALADVPGTHEFLLMDDGKWQHVKETTEIGEGKLFSPGNLRATFDNPEYEKLINYYVGEKYTLRYTGGMVPDVNQIIVKEKGVFTNVSSPSTKAKLRLLFEVAPLGFLIEKAGGFSSDGTQSVLDKVVKSTDDRTQVAYGSKQEIIRFEETLYGSSRLSSVLSAAAA
			Ceric.07G060400.1.p	MAMASSSCVGSPCAPLSKQGVKGGTHLTWGASSFHGGCSGLVKASTFKEACAFPSRRANHGVIRATLTVEPSKTSSKKSQYEIQTLTGWLLKQEQSGVIDAELTIVLSSISLACKQIASLVQRAGISNLTGVQGATNVQGEDQKKLDVVSNEVFSSCLRSSGRTGIIASEEEDIPVAVEESYSGNYVVVFDPLDGSSNIDAAVSTGSIFGIYRPTEECLANLDDDENGALNQQAQNCIVNVCQPGSNLLSAGYCMYSSSVIMVLSVGNGVYGFTLDPLYGEFVLTHNGIKIPSKGKIYAFNEGNYQLWDDKLKKYIDDLKDPGPTGKPYSARYIGSLVGDFHRTMLYGGIYGYPRDKKSKNGKLRLLYECAPMSFLAEQAGGKGSDGHRRVLDIHPEEV…
			Ceric.11G097700.1.p	MAVIVGAGLNHLSASVEDSMSAPSCAVERGLAAESCALPSSSQKRTRSKRLLRFTRASSNTGASHWMEMERIQEETSCLHSSVHSQRPTSSSALWAGYMANSLELPSQELHEFQEESQKNDSVVLPSTLLQGKYERELDVAIRAVQLACILTQETQERILRKQEKADSKADRSLVTVADWGVQAVISWVLAQEFGEDLCMIAEEDTEALKGMDGIHMLQRVVESVNECLNSLLIVGLNPLDQPLCSIDVLKAINKGACEGGPKGKFWVLDPVDGTLGFVRGDQYAIALSLIVDGEVVLGVLGCPNYPMRREWLRYHQKYYRLLCKLSPPSPQVWHKGCIFTAQRGCGSWMQPLIWNLSDPNIMKLARSISVSTIDDPIEATFCEPVEKANSSHSFTAGL…
			Ceric.15G014900.1.p	MEACLGTGMHGSYTPGSTCKNAYIAVPYGHSRNALFGAHDCRLSAPLSVAKKASTNIFTHLKDGKRSFALFAAAEALGEKTASPSVDEFLELAHQLADVAGDILRKHFRQRIEIKDKEDKSPVTIADQEAEEAMRLLISKQFPSHAVFGEEWGLTSKMDYFEYVWVLDPIDGTKSFITGKPVFGTLISLVFKGVPIIGIIDQPILHERWVGVKGRKSLLNGKEIETRPCTSISNAYMYTTSPHLFSGAAAEAFLRIKDKVKVPLYGCDCYAFGLLASGFVDLAIESGVKPYDFLALIPVVEGAGGKFTDWKGQKVEWWPSGDDIAQGTDVIAAGDVRVHEAALEVLGFHQ
			Ceric.15G024400.1.p	MQTTLYSPRLACISIPSLSAYPHKALIDHSRSKHLSPRRLFTDCNYLQVIAKVAAESHSQIMGSSGDGVLTGDHTLLSFLGRKDSGSDDELIILLSHVQAACAKIASLLASPSTVKAACEMKPSSPSVTTSGRDAPKPLDLVANDIIKAALKCSGKAAVIASEEDEMPIWLNDTAPYVVVFDPLDGSRNIDASIPTGSIFGIYRRLEETDGLPEAEKAELNVLQRGEKLVAAVYSLYSSATVLCVSIGSGAHVFTLDRSNGDFVLTNSNLMMPTRGQIYSVNDARYFDWPEGLRNYIDDVRQGKGQNPKKYSARYICSLVADFHRTVLYGGLAMNPRAHLRLVYEANPLSFIAEQSGGKGSDGKRRILDIQPIELHQRLPLFLGSADDISELLSYKNIQ…
			Ceric.25G052000.1.p	MECVRANFRLTRLAVHLTSATRFSSVITRTNFSGCARSAMSSSSYEHELRVAVGAARLAARLCQAVQKKLLAKETQSKADKSPVTVADYGSQALVSWALERGIGSENFSMVAEEDADDLRKDDGLDMLLRITDLVNNAIIDEGLESSPILTKENVLEAIDRGRSQGGPVGRHWVLDPIDGTKGFLRGDQYAVALALLDEGEVVLGVLACPNLPLAGVSLQTSSGEPVGCLFSATRGGGTMMQSLNDSFAPKQVYVSDVDHPALACFCESFESAHSRQTLTDQIAKIMGVQAPPIRIDSQAKYGAMARGDAVIYMRFPHVGYREKIWDHAAGCIVIEEAGGVVRDAAGKRLDFSKGRYLDVEHGILATNPKLIDTLLTSVEAALKVYK
			Ceric.29G080800.1.p	MPSLATMASSILPRSSLLPSRHLRSVRAFPSSFQSCLRFSLSRSACVASSSYSTVAADRSRVDISRESIDSLMEVVHAAAKRGAEVVMEAVDKPRNIDYKGKTDLVTDTDKRCELAILELVNSKCPDHLILGEEGGVSGDSSSPFLWCIDPLDGTTNFAHGYPSFAVSIGVLYKGRPLAASVVEFSGGPYCWITRTFTASAGGGAFCNGNKICVSNSDTIEKSLFVTGFGYEHDEPWSTNIELFKEFTDISRGVRRLGAAAVDMCHVALGIAEAYWEYRLKPWDMAAGVLMVEEAGGIVTRMDGGDFTVFDRSVLVSNGHLHDKLLKIIAPPSKLLIQKGFDFSRWYKPEGYALDF
			Ceric.30G031700.1.p	MDHAADAMRTDLMTITRFVLNEQSKFPEARGDLTILLNHIVLGCKFVCSSVSKAGLAKLIGLAGDTNVQGEEQKKLDVLSNDVFIKALSSSGRTNVLVSEELEEAVFVDEKLRGRYCVVFDPLDGSSNIDCGVSIGTIFGIYMLKEGSAGTLNDVLQPGKNMIAAGYCMYGSSCTLVLSTGTGVNGFTLDPSLGEFILTHPDIQIPKKGKIYSVNEGNAKNWDEPTRKFVENCKFPQDGSSPKSLRYIGSMVADVHRTLLYGGIFMYPADKKSPNGKLRVLYEVFPMSFLVEQAGGMAFTGKGRALDIVPTKIHQRSPIFLGSYDDVEQIKALTCFFPRVLCGS
			Ceric.30G067000.1.p	MDHYLSVAVDAAKLAGKVIAENFYAEKHVEHKGKVDLVTETDKACEKLAFEHIAKTFPDHKFIGEETTALSGTFELDDSPTWIIDPLDGTTNFVHRYPFVCISIGLTIKKVPVVGVIYNPILNELFTAVKNGGAFLNGSPIRVSSQEHLGSALLASEVGVKRDKLTVDATTDRLNSFLYKVRSLRMSGSCALNLCGIACGRLDIFYELGYGGPWDVAAGVVIVQEAGGHIFAPSGEEFDLTKQRIAASNGLLKDSFVQALKETNAL
			Ceric.31G019200.1.p	MACSYFLSTPTPSTPTRQPANPSTSLSWVASSIHGGLSSVAMAGSIRDARSVMTRLHLQGVRATLTIEPSKTSAKKSQYELQTLTGWLLKQEQSGVIDAELTIVLSSISLACKQIASLVQRAGISNLTGVQGATNVQGEDQKKLDVVSNEVFSSCLRSSGRTGIIASEEEDIPVAVEESYSGNYVVVFDPLDGSSNIDAAVSTGSIFGIYRPTEGCLANLDDDTSLDQQAQNCIMNVCQPGSNLLAAGYCMYSSSVIMVLSVGKGVHGFTLDPLYGEFVLTHSDIKIPSKGKIYSFNEGNYQLWDDKLKKYMDDLKDPGPSGKPYSARYIGSLVGDFHRTMLYGGIYGYPPDKKSKNGKLRLLYECAPMSFLAEQAGGKGSDGYRRVLDIHPEQVHQRV…
	Diphasiastrum complanatum	11	Dicom.03G061200.1.p	MEHFTYCHNNQGFASPRSRIFHSIFNRVSRSLFICHRSCSVRRSAKLSVAIWSQPGINIQSRFCESIRKGDSFKKRAMSSEDREADASKSSNEFLEVANRLADAAAEITLKYFRTPIDIIDKLDKSPVTVADQAAEKAMRLIIAQHFPSHAIYGEEGGLSSPEYATEYTWVLDPIDGTKSFITGKPLFGTLIALVQGGIPILGIIDQPVLKERWIGQRGQPTTLNGKEVKTRSCTSLSNGYMYTTSPHLFAGQAEAAYERLRKKVKVPLYGCDCYAYGLLAAGHVDLVVESGLKPYDYLALVPVVEGSGGIITNWNGQSLRWWPSMEPSEMTADIIAAGAADVYRDALEILTKR
			Dicom.06G101100.1.p	MATASALSQNALHAAAGNFSLPTDSSRSLHKPFIGGSIAGLSPQLSRSSTHGLISRRQHQQVGAWAVKAAVTVGSPEPKYKKKSQYEIQTFTNWLLRQEQADVIDAELTVVLSSISLACKQIASLVQRAGISNLTGVQGAVNIQGEDQKKLDVVSNEVFSNCLRSSGRTGIIASEEEDIPVAVEESYSGNYIVVFDPLDGSSNIDAAVSTGSIFGIYRPNEGCFPDLGDNPTLDQLEQNCVVNVCQPGENLLAAGYCMYSSSVILVLSVGQGVYGFTLDPMFGEFVLTHDDVKIPLKGKIYSFNEGNYALWDDKLKKYIDDLKDPGPSGKPYSARYIGSLVGDFHRTLLYGGIYGYPSDKKSKNGKLRLLYECAPMSFLVEKAGGKGSDGHRRIMEIHP…
			Dicom.07G033400.1.p	MIIQPSLSLSPSSSAPSLTPSHSSSHFLANPHTSSAASASGRILFTNNNTRVPHILPLTVVPRPRTSSAVHLAKRWPPLGADSMNHPVFGQSLLAFIGEQDARVEEGLMPVILHLQAACKQIAAVLGSPSGLSSVTQNVEASLEAGSSSTRDVPKPLDIVSNDLLKSALKSSGKVCVIASEEDNLPLWLNDTGPYVVVFDPLDGSRNIDASIPTGTIFGIYRRLEEADNLPTDHKASLNVLQRGSRQIAAGYAIYSSAIVLCLTFGSGTHGFTLDRSSGEFLVSHPNIRIPERGQIYSVNDARYFDWPEGLRNYIDNIRQGKGQNPKKYSARYICSLVADLHRTILYGGIAMNPRDHLRLVYEANPLSFLVEQANGKGSDGKRRILDIQPVGVHQRLPL…
			Dicom.07G113000.1.p	MAAVDKPRTIDYKGTADLVTDTDKKCELAIVEAVRKLFPTHLILGEEGGLSGDPTSEYLWCIDPLDGTTNFAHSYPSFAVSVGVLFKGRPIAAAVVEFTGGPFCWATRTFTAEAGKGSFCEGKQIHVSSNDRVERSLLVTGFGYKHDEPWATNMEFFKHFTDVTRGVRRLGAASVDMCHVALGIVDAYWEYFLKPWDMAAGVLIVEEAGGRVSRMDGDDCSVFDRSVLVSNGVLHDKVRLYHSRRRRQIQFLVQWDGRPIEEATWEPIDVFYHTPLLADQARALAALVDSSTSDVPLVVDALGLAAT
			Dicom.11G000300.1.p	MGSSHETLDAYLVVGIEAAKQAGQVILSNFYKSKTVEHKGTVDLVTETDKACEDLIFQHLQKTYPKHKFIGEETAAVLGTSELTDAPTWIVDPLDGTTNFVHRYPFVCVSIGLTVGKLPMVGVVYNPILNELFTTIKGRGAYLNGERITVSQQDQIVKALLATEIGTKRDKKTVDATTNRLNHLLFKVRSLRLSGSCALNLCGVACGRLDLFYELGFGGPWDIAAGVLMVQEAGGSVFDPSGEHFDLMSQRIAASNAFLKQDLVDALRTADA
			Dicom.12G023600.1.p	MQTLLLRAPIMIRATSSLGHEKRLVTKASVSCTLVSVSSFQQHSLHTTESVRVSIKCSNLVRRTEGLQFFEDEGNMEAASHGQGLSSQSKPNGSTDLFETYSFDSDKIVSGKYAKELEVATRAVQLGCMLSQRVQERILCKKEQANFKSDRSVVTVADWGVQAVIIWVLSQAFSADEIPVVAEEDTKALKGMDGIHVLQRVVEAVNECLSECAVVGIPPPKHPLGTIDVLKVINKGSAQGGPKGKFWVLDPVDGTLGFVRGDQYAVALALIADGEVVLGVLGCPNFPMKKVWLNYHHRYYRLASKLHPPSSDLWHKGFVLIAKKGAGQAWMEPLAWNLQGSHIVKIFKAVKVSLIDDPAEATFCEPVEKANSSHSFTAGVADSLGLRKHPLRVYSMAKY…
			Dicom.14G059700.1.p	MDHAADAQRTDLMTITRYVLNEQSKHPEARGDLTILLSHIVLGCKFVCSAVNKAGLAKLIGLAGDTNIQGEEQKKLDVLSNDVFINALKSSGRANVLVSEENEEPIFVEASKRGRYCVVFDPLDGSSNIDCGVSIGTIFGIYMLQEGSEGTVADVLKPGKNMVAAGYCMYGSSCTLVLSTGTGANGFTLDPSLGEFILTHPNIKIPKKGKIYSVNEGNAKNWDQPTTSYFIICRYVEKAKFPIDGSSPKSLRYIGSMVADVHRTLLYGGIFMYPADKKSPNGKLRVLYEVFPMSFLVEQAGGQSFTGQGRALDIVPKNIHERSPIFLGSYDDVEEIKALYSAAEVKKE
			Dicom.15G034800.3.p	MQFALALPRFFLSPSSSFFASSASSSISLFRRPFSAKCATSPAAMAYEHELSIATKAVSLACRLCQKVQKGLLAAETQEKSDKSPVTVADYGSQALISWALNEELPQGTFSLVAEEDSEELKQDQGASMLDRITQLVNETLALEKRIDAPFLSKEQVLLAIDRGRSEGGSVGRHWVLDPIDGTRGFVRGDQYAVALGLLDQGEVVVGVLGCPNLPTNLIGPEALVSPTESSIGCLFAARKGAGTTVKSIDGSIQPQKISVRNLEDPSLANFCESYESAHSMQNVTAEIAKILGVVSPPLRIDSQAKYGAMARGDAAIYLRFPHPGYREKIWDHAAGCIIIKEAGGLVLDAAGNPLDFSKGRYLDIASGIISTNPQLMPALLAAVQAALQKEHHHGERVHL
			Dicom.20G031100.1.p	MAALAPAIGQVGSFAATGLVARSSHSGSCGINCLQAPLVVKNSPIAVSKLGGSGSVFYGKASPFLQLSSRFQTSSFSSRRVLTRAELGDTLEEFLATASPDKNLGRLLVSLGEALRTISFKVRTASCGATACINTFGDEQLAVDLLANKLLFEALKFSHFCKYACSEEDPELLDMGGPVNGGFSVAFDPLDGSSIVDTNFTVGTIFGVWPGDKLTGVTGRDQVAAGMGIYGPRTTYVLALKDFPGTHEFLLLDDGKWQHVKETTEIGEGKLFSPGNLRATFDNPDYEKLINYYVSERYTLRYTGGMVPDVNQIIVKEKGIFTNVTSPTTKAKLRLLFEVAPLGLLIEKAGGYSSDGKQSVLDKVIINTDDRTQVAYGSKNEIIRFEETLYGASRLAKVP…
			Dicom.Y126900.1.p	MATASALSQNALHAAAGNFSLPTDSSRSLHKPFIGGSIAGLSPQLSRSSTHGLISRRQHQQVGAWAVKAAVTVGSPEPKYKKKSQYEIQTFTNWLLRQEQADVIDAELTVVLSSISLACKQIASLVQRAGISNLTGVQGAVNIQGEDQKKLDVVSNEVFSNCLRSSGRTGIIASEEEDIPVAVEESYSGNYIVVFDPLDGSSNIDAAVSTGSIFGIYRPNEGCFPDLGDNPTLDQLEQNCVVNVCQPGENLLAAGYCMYSSSVILVLSVGQGVYGFTLDPMFGEFVLTHDDVKIPLKGKIYSFNEGNYALWDDKLKKYIDDLKDPGPSGKPYSARYIGSLVGDFHRTLLYGGIYGYPSDKKSKNGKLRLLYECAPMSFLVEKAGGKGSDGHRRIMEIHP…
			Dicom.Y374500.1.p	MCRFLTGFLGRLSIHNFVRRLLVIVVRVLCVNRFAWFRTPLRSQHLRVISGADWGVQAVIIWVLSQAFSADEIPVVAEEDTKALKGMDGIHVLQRVVEAVNECLSECAVVGIPPPKHPLGTIDVLKVINKGSAQGGPKGKFWVLDPVDGTLGFVRGDQYAVALALIADGEVVLGVLGCPNFPMKKVWLNYHHRYYRLASKLHPPSSDLWHKGFVLIAKKGAGQAWMEPLAWNLQGSHIVKIFKAVKVSLIDDPAEATFCEPVEKANSSHSFTAGVADSLGLRKHPLRVYSMAKYAAIARGDAEIFMKFAKAGYKEKIWDHAAGVLIVQEAGGVVTDAGGQPLDFSKGRYLEGLDRGIIASSGKRLHEKLLAAVEESWDSSSL
Gymnosperms	Thuja plicata	9	Thupl.29377531s0011.1.p	MKVSCLSSHLPCFIAPTRKLTIRSRLTFLTDNGKYSRELEAAVDVVQRACLLCVEVQKRLFSKERGVLEKGDRTPVTVADFGVQALISMELGRLFPSIPLVAEEDSSQLRLDLENFQQNGASGSLVEAVMNAVTNSQSLQGELLNYKQILKAIDRGGQVMTSEEKSGTYWVLDPIDGTRGFVRGGKALYVVGLALVVEGTPTLGVMGCPNWDAESKYIVQNLAKEITNKDELEDFIVPGIIMAANYGCGTWIKKISCNTRNVALDGSNNGWSRCKVDKCDSFQAARFCIADRETWELLPLSKNLAADVSVDCAKSWNPTIVPTCCGSLCKYMMVAAGRASVFLLQVTKQSSVKVWDHAAGIICVLEAGGEVTNWDGSSLALSRDGDRRRIIIPRGGGIL…
			Thupl.29378279s0013.1.p	MGDYSKLANEDELSGYLSSAVEAASRAGEMISTNFYKDKTVELKGKVDLVTETDKACEELVFKFLKEKYPDHKFIGEETSAVYGTSELTDEPTWIIDPVDGTTNFVHRFPFVCISIGLTIGKVPTVGVVYNPIIDELFTAVRGRGAYLNGQPISSSSQSEIGNALLAAEVGVARDKETVDATTKRINGLLFKVRSLRMTGSCALNLCGIACGRLDIYYELGFGGPWDVAAGVVIIQEAGGCVFDPSGGEVNIMTQKIAASNRFLKHAFVNELNELGL
			Thupl.29379820s0008.1.p	MASLRLSINSFPLPPIHSSKTLSSRTFDFSRFTFSHCFGSKCRESLWAKQNNGQLDYKFRNICVLAAKQSIAVGKNYSKIGAETTGILSAADLLAGAEAAAKRGAEVVMEAVHKPRNIEYKGKTDLVTDTDKRSELAIEEVIRENFKNHLILGEEGGFTGDASSEYLWCIDPLDGTTNFAHGYPSFAVSVGVLYRGRPAAAAVVEFAGGPLCWVTRSFSASAGGGAFCNGQPIHVSSSDQVERSLLITGFGYDHDDAWATNMDLFKEFTDVSRGVRRLGAAAVDMCHVALGIAEAYWEYRLKPWDMAAGVLMVEEAGGSVTCMDGGHFCVFDRSVLVSNGTLHEKLLEKIAPPTKKLIQNGMDVSRWFKPKNYKSDV
			Thupl.29380179s0012.1.p	MRSLILCPNLNYHGFPVLPLQSHLKCLKSSPAHRPIKQLTPSRRVEVAAMESSAEGHGMKFRTLMDYLGTDGANVADDMAILFTHMQCACKRVAALVASPWNATLAKGGTPSLAAGSNTGRDSPKPLDIVSNDIIKYSLQSSGKVAVMASEEDDLPVWLRNDGPYVVVFDPLDGSRNIDASIPTGTIFGIYHRLEELDDNMTAHEKASINVLQRGERLVAAGYALYSSATILCISVGSGTQGFTLDHSTGEFVLTHPNILIPPRGQIYSVNDARYFDWPDGLRRYIDTVRQGKGQNPKKYSARYICSLVADFHRTLLYGGIAMNPRDHLRLVYEANPLSFLVEQAGGNGSDGKRRILGIQPVELHQRLPLFLGSSADISELESYGDIQQLVNPGYTI
			Thupl.29381156s0005.1.p	MATASVHSFSSLNHLLQGHPHSITRSPQRLSVPLSFSTLSNFGWCANLSDGRKNGNVLSVRNRAVASEQSKTEVQGQQTKKQSVYDIQTLTAWLLRQEQSGAIDGELVIVLSSISLACKQIASLVQRAGISNLTGLQGETNVQGEDQKKLDVVSNEVFSSCLRWSGRTGIIASEEEDIPVAVEETYSGNYVVVFDPLDGSSNIDAAVSTGSIFGIYHPNEECLTDIGGDATAMTKSAERCIVNVCQPGSNLQAAGYCMYSSSVIMVLSVGKGVYGFTLDPMYGEFVLTHEDIKIPKKGKIYSFNEGNYELWDEKLKKYMSDLKDPGPSGKPYSARYIGSLVGDFHRTLLYGGIYGYPADKKSKNGKLRLLYECAPMSYIVEQAGGKGSDGHKRVLDIQP…
			Thupl.29381454s0001.1.p	MRISILRYAGEAVAMSIFGVNRANAFSRTLTSSSTLLLYPSSLTSTPRCRGRSRSISISRVKMGYEQDLAIAIKAVSLAARLCQGVQRSLLQSDTQSKMDNSPVTVADYGSQAIISLVLERELPPGSFSMVAEEDSGDLRKTDAHDVAQRITELVNQTISLDGTYNISPLTIEDVLEAIDKGKSEGGPHGRHWVLDPIDGTKGFLRGDQYAIALGLLDEGNVVLGVLGCPNLPCTSVNISVKPSIDNIGCIISATKGAGTSMQSLDGSIQPKRICVSAVENPEEASFFESYEQKHSRHDLSAAIAKILGVKAPPVRLDSQAKYGAMARGDGTIYLRFPHPGYREKIWDHAAGCIVVQEAGGVVVDAAGKPLDFSKGRYLDVEKGIISTNTMLMPLLLNA…
			Thupl.29381554s0003.1.p	MDHAADAYRTDLMTITRFVLNEQSRYPESRGDFTILLSHIVLGCKFVCSAVNKAGLAKLLGLAGETNVQGEEQKKLDVLSNEVFVKALVSSGRTCILVSEEDEEATFVEPALRGKYCVVFDPLDGSSNIDCGVSIGTIFGVYSIKAGDEPKLGDVLRPGNDMVAAGYCMYGSSCTLVLSTGSGVNGFTLDPSLGEFILTHPDIKVPNKGKIYSVNEGNAKNWDEPTKKYVERCKFPKDGSSPKSLRYIGSMVADVHRTLLYGGIFMYPADKKSPNGKLRVLYEVFPMSFLMEQAGGQSFTGKKRALDIVPSKIHERSSVFLGSYDDVEEIKALYAKEEVKA
			Thupl.29381906s0009.1.p	MATILSHPSFGCACFWQQVSGHRLISPRHMVKTVVCPSSYKTDCFSRNTRTRIRNPIWCGTGESLFALKLDMEGQAENNGESTSTDTAPELRTPTLDAAVGALKLGGKYDRELEVARRAVHLACALCQRVQDRLLKNEEKANTKSDSSFVTVAADWSVQTVISWVLSQYFGEEHISIIAEEDTQALRGRDGNELLQGVVSTVNECLSEAVMFGLESPLKSLGTLDVLNAINKGNSKGGPSGRHWVLDPVDGTLGFVRGDQYAIALAMIEDGEVVLGVLGCPNYPMRREWLNYHHRYYQLMSKLSPPGSGVWSKGCVISAQKGSGQAWMEPLVNDIIKLGLSTLARPAIVSSIDDPALATFCEPFEKENSSHSFTEGLAHSLGLRNCPLRVYSMAKYAAI…
			Thupl.29382069s0008.1.p	MEATARMVAYQSGSGSGTPLSRPSLAPPTATARTIPSSSVQVSAKASSIYGQSLRTWPKFSTGRRASGRVMKAGPLGSGSSTSVIKCELGDSLEEFLNKSTPNKNLIRLMVCMGEAMRTIAFKVRTASCGATACINTFGDEQLAVDLIANKLLFESLRYSHFCKYACSEENPVPEDMGGPVEGGFSVAFDPLDGSSIVDTNFTVGTIFGVWPGDKLTGVTGRDQVASAMGIYGPRTTYVLALKDAPGTHEFLLMDDGKWHHVKDTTEIGEGKLFSPGNLRATFDNPDYEKLINYYVSEKYTLRYTGGMVPDVNQIIVKEKGIFTNVTSPSAKAKLRLLFEVAPLGLLIEKAGGHSSDGKQSVLDRVIINVDDRTQVAYGSKNEIIRFEETLYGSSRLSL…
Angiosperm	Amborella trichopoda	10	AmbCFBP1	MAAAVPASTQLSLPHSRSLSRLSTAGKYSDVRTPKCPHRRTLISGTTLRIRALAVSTMQASAPKKKSSSYDLQPLTSWLLKQEQAGIIDAELTIVLSSVSMACKQIASLVQRAGISNLTGVQGAINIQGEDQKKLDVVSNEVFSNCLRSSGRTGIIASEEEDVPVAVEESYSGNYIVVFDPLDGSSNIDAAVSTGSIFGIYSPNDECLADIGDDEALDQLEQKCVVSVCQPGDNLLAAGYCMYSSSVIFVLSIGNGVHSFTLDPMYGEFVLTQQDIKIPKQGKIYSFNEGNYRLWDEKLQKYMDDLKDPGPSGKPYSARYIGSLVGDFHRTLLYGGIYGYPRDKKSKNGKLRLLYECAPMSFLVEQAGGKGSDGHRRILDIQPEEIHQRVPLYIGSVEE…
			AmbCYFBP	MDHSVEAHRTDLMTITRYVLNEQSKHPESRGDFTILLSHIVLGCKFVCSAVNKAGLAKLLGLAGETNIQGEEQKKLDVLSNEVFVKALVSSGRTCILVSEEDEEAIFVEPSKRGRYCVVFDPLDGSSNIDCGVSIGTIFGIYTVKDQDEPSLNDVLQPGKNMLAAGYCMYGSSCTLVLSTGSGVNGFTLDPSLGEFILTHPDIKIPKKGNIYSVNEGNAKNWDGPTTKYVEKCKFPKDSSSPKSLRYIGSMVADVHRTMLYGGIFLYPADKKSPNGKLRVLYEVFPMSFLMEQAGGQSFTGKERALDLDPTKIHQRSPIFLGSYDDVEEIKALYAEENAKA
			AmbFBP1	MASSSPSGSGFKVQSLMGSSSSEGFQTLMDYIGKEGADIGDDLVILLNHLQYACKKIAALVASPVSSKLRQQIEFSEFGQRMARDKPKPLDIVSNEIILASLRSSGKVAAMASEEDDSPVWIADNGPYIVVTDPLDGSRNIDASIPTGTIFGIYNRLIELDHLPVTEKALLNSLQCGQRLIAACYVLYSSATILCISFGSGTHAFTLDRSLGDFVLTHPYIKIPARGQIYSVNDARYFDWPEGLKQYIDTIRQGKGEYPKKYSARYICSLVADLHRTLIYGGVAMNPRDHLRLVYEANPLSFLVEQAGGRGSDGKSRILSIQPVELHQRLSLFLGSSEDIEELESYGEVQQKVNPGYEV
			AmbHL	MEDNGNDDPLGSNIPVKVCGKYDHELDVAVKVVQLACSLCQKVQENLVQNQDKVKAKEDSSLVTVADWSVQATVSWVLSEYFGSESISIVAEEDVQALTRVDSTALLDTVVSTVNECLSEANGFGLKGPKKSLGSSEVLEAIGRCNSNGGPKGRHWVLDPVDGTLGFVRGDQYAVALAMLEEGEVVLGVLGCPNYPMKKEWLNYHHSYYRIMSKLSSPTFESWHKGCVMYAQRGSEAWMQPLLCDNKQFSFQSLARSIRVSSIDDPALATFCEPVEKANSSHSFTAGLAHSMGLRKRPLRVYSMVKYAAIARGDAEIFMKFAKAGYKEKIWDHAAGALIIQEAGGVVTDAGGRPLDFSKGIYLEGLDRGIIACSGAVLHKKLIKAVYDSWDSSNL
			AmbIMPL1	MAPSLSSPKTISQTFSLIPSHSFSLVSHRLPNYRNLLPRTHEPSLRLKHGIQLSFDTNSMGGFRCGAILSDVERERNYRKIGSQSTGSLSANQLLELVEAAAKTGAQVVMEAVNKPRSITYKGTTDLVTDTDKRSELAILEVVRDNFNDHLILGEEGGLIGNTSSDYLWCIDPLDGTTNFAHGYPSFAVSVGVLFRGRPAAAAVVEFVGGPMCWNTRTFSAATGGGAFCNGKRIHVSATDQVEQSLLVTGFGYEHDDAWATNIDLFKEFTDISRGVRRLGAAAVDMCHVALGIVEAYWEYRLKPWDMAAGVLIVEEAGGSVTCMDGGNFCVFDRSVLVSNGALHGKLLERIGPATEKLKSKGINFSHWFKPENYNSDV
			AmbIMPL2	MDYDQNMGVFEKVANKVADAAGEVIRGYFRKSFTILDKDDLSPVTIADRAAEESMVSVILENFPSHAIYGEENGWRSSERTADYVWVLDPIDGTKSFITGKPLFGTLIALLHKGKPIMGIIDQPILRERWIGMKGRKTTLNGEEVSTRLCSKLSDAYLYTTSPHLFSGDSEEAFVRVRNKVKVALYGCDCYAYALLASGHVDLVIESGLKPYDFLSLIPVIEGAGGLITDWKGHDLYWEASPDMRVTGYNVVAAGDPQLHQQTLNALRWN
			AmbIMPL3	MNLLHSKSLSSTLRFKSPERIYSREISSRLFSIRCCLPFPREKAKHYRELEVAIDVVQSACRICIDVKKSLSLNDGRIVEKNDQTPVTIADFSVQALISLELNRSFPSIPLVAEEDSTFLRSSLTNSIEDKDYASSFLVDSVLAAVIGKASIESKPLSQEDVLNAIDRGGSGAHTFDAKPSTYWVLDPIDGTRGFLKGRKALYVVGLALVVEGEIAVGVLGCPNWKEESVSVQGLCSEDKIPNISECHANQAGILMVSHVGCGTWTRRLSSMLGNMDFLVIHDGWTRCSVDPCAFVYEARFCIPDSQTWESLPLSTIYSSTTDMGSSIKDKTKLVLKSVCCGSLCKYLMVAMGMASVFILRARMKTVIKVWDHVAGMICVSEAGGRVTDWKGSDLELAA…
			AmbSAL1	MATSYSVVRAFSKRYTPSFLSPLLLSFNVCNLSFFPSSSSSVALSSEAKKSPARACSSLSASATTMSFSSSYEKELSVAKKAASLAAKLCQAVQFELLQSDVQSKLDKSPVTIADYGSQALVSFVLERELPSESFSLVAEEDSGDLRKDSARETLERITKLVNETIALDGSYVIPPLTAEDVLAAIDRGKSEGGPYGRHWVLDPIDGTKGFLRGDQYAIALALLDEGRVVVGVLGCPNLPLVPINTVDKLAVDSARGCLFSARIGAGTHMESLDGSQTQKVHVSATENPAEASFFESFEAAHSMHDLSKNIAQKLGVQAPPVRIDSQAKYGALSRGDGAFYLRIAHRGYREKIWDHAAGFIVVTEAGGVVTDAAGNALDFSRGRYLDVDTGIIVTNAKL…
			AmbSBPASE	METGVLTYTCGTLVPHTSRPSSTPSLSRFINSQSSKCSAIYGESLRLSPKSQSRRTAKVGAGKSSSTITRCEIGDSLEEFLTKATPDKNLIRLLVSMGEALRTISFKVRTASCGGTACVNSFGDEQLAVDILANQLLFEALRYSHFCKYACSEEVPELQDMGGPVEGGFSVAFDPLDGSSIVDTNFTVGTIFGVWPGDKLTGVTGGDQVAAAMGIYGPRTTYVLALKDLPGTHEFLLLDEGKWQHVKDTTEIGEGKMFSPGNLRATSDNPDYAKLIDYYVKEKYTLRYTGGMVPDVNQIIVKEKGIFTNVTSPSAKAKLRLLFEVAPLGLLVEKAGGYSSDGKQSVLDKVISTLDERTQVAYGSKNEIIRFEETLYGSSRLKAGTPLAAAV
			AmbVTC4	MGEKDELDGFLSVAVEAAKRAGEIIQRGFYETKNVEHKGQVDLVTETDKACEDLIFNYLKLHYPKHKFIGEETSAACGATAPLTDEPTWIVDPLDGTTNFVHGYPFVCVSMGLTIGKVPTVGVVYNPILNELFTAIKGQGAFLNDLPIKASSQTELVKSLLATEVGTKRDQSNVDATTNRIKSLLFKVRSLRMSGSCALNLCGVARGRLDMCYEIGFGGPWDVAAGAVIVAEAGGCVFDPSGNEFDIMSQRVAASNAHVRDAFISALREAM
Monocots	Oryza sativa	11	OsCFBP1	MAAAATTSSHLLLLSRQQAAASLQCGLSFRRQPGRLAGGSSAPSVRCMAAVDTASAPAATEASKKSSYEITTLTTWLLKQEQAGTIDGEMTIVLASISTACKQIASLVQRAPISNLTGVQGAVNVQGEDQKKLDVVSNEVFSNCLKSSGRTGVIASEEEDVPVAVEESYSGNYIVVFDPLDGSSNIDAAVSTGSIFGIYSPNDECLADIADDQNLDQVEQRCIVSVCQPGSNLLAAGYCMYSSSVIFVLTIGTGVYVFTLDPMYGEFVLTQEKVQIPKAGKIYAFNEGNYALWDDKLKSYMDSLKEPGPSGKPYSARYIGSLVGDFHRTLLYGGIYGYPRDQKSKNGKLRLLYECAPMSFIVEQAGGKGSDGHQRILDIMPTEIHQRVPLYIGSVEEVE…
			OsFBP1	MPLSSLSLLPLHRAPLPPTSNYPPPPPPSRALLLPLLRHSPLARRSPVSRARAVAADGMAAATAAAETPPTLLEYMGQAGAADDLVVLVAHVQSACKRIAALVASPGNAELSRGKAGGGVAVAAGRDAPKPLDELSNEIILSSLRRSGKVAVMASEENHLPIWVSNDSPYVVVTDPLDGSRNIEVSIPTGTIFGIYNRLAELDHLPEEERAQLNSLQSGTHLVASGYVLYSSATIFCISFGAGTHGFTLDHLTGEFVLTHPSIQIPPRGQIYSVNDARYFDWPEGLRKYIDTIRQGKGQHPKKYSARYVCSLVADFHRTLIYGGVAMNPRDHLRLVYEANPLSFLAEQAGGRGSDGKSRILSIQPVKLHQRLPLFLGGMEDMLELESYGDVQQKVNPGY…
			OsHL	RCRLTKKVEHEEEAAEEEEHLATTGSIHPPIHRRRRRRRRRRGLRASPPWDAAASASPPGRRPRRRRRRTGTGGSPRVGTAEHDWLWDCRGIGGGGRDYAREMEVAVRVVQAACTLCQRVQSSLLLPASASASGSVHSKIDRSPVTVADWGVQAIVSWLLSDCFQDENISIVAEEDDETLSSSDGAALLESVVAAVNGCLIEAPKYGLRSPEKELKAHDILQAIRRCSSIGGPKGRFWVLDPVDGTLGFVRGDQYAVALALIEDGEVVLGVLGCPNYPMKKEWLNYHQRYYRLMSKVSPPTSGSWHKGCVMYAHRGCGQAWMQPLVHDFGKLDWRNSREVRVSTVSDPISATFCEPVEKANTSHSFTAGLAHSVGLRKQPLRVYSMVKYAAIARGDVEI…
			OsIMPL1	MARYLLRPPTAAAAAAAAASSHRRNGTTSPRGPVLGLRALASRAGKARPVMAVASEQPAARGKCPKVAAPTTGPIPAAELLGVIQDAARAGAEVIMEAVNKPRNIHYKGVADLVTDTDKLSESVILEVVRKTFPDHLILGEEGGLIGDALSEYLWCIDPLDGTTNFAHGYPSFSVSIGVLFRGKPAASTVVEFCGGPMCWSTRTVSASSGGGAYCNGQKIHVSKTDKVEQSLLVTGFGYEHDDAWVTNINLFKEYTDISRGVRRLGSAAADMSHVALGITEAYWEYRLKPWDMAAGVLIVEEAGGMVSRMDGGEFTVFDRSVLVSNGVVHDQLLDRIGPATEDLKKKGIDFSLWFKPDKYPTDF
			OsIMPL2	MLPATSTVPPTSPLPHSRAAPRRHLRAGLLHGSVATAAVVRACGVTTGHRRRMGSVRASPRAGGWEVAMADKEGVGVERLVEVAQRAADAAGEVLRKYFRQRVEIIDKEDQSPVTIADREAEEAMVSVILKSFPSHAVFGEENGWRCVEKSADYVWVLDPIDGTKSFITGKPLFGTLISLLYKGKPVIGIIDQPILRERWVGVDGMKTTLNGQEISVRPCNVLAQAYLYTTSPHLFAGEAEDAFIRVRDKVKVPLYGCDCYAYALLASGFVDLVVESGLKPYDFLSLVPVIEGAGGSITDWKGNKLHWPVSAESRPESFNVVASGDARVHKQALDALQWH
			OsIMPL3	MPLLHLSPPPHRLLLAGGGRRRLLLPAARRRSLVRVRAAASAAAAAAEAYGLPFPPERAAHHRELAAAAAAVERACRLCVDVKRTLLSGDKKILEKNDQTPVTVADFGVQALISLELQRLFPSIPLVAEEDSASLRSSNTDDNSSNVLVESISSAVAEKVSNANSLLTHDDVLRAIDRGGKNAVSFDSNPASYWVLDPIDGTKGFLGGDDALYVVGLALVVNEKVVAGVMGCPNWSNATIASRKEDSAAAQPDHGILMIAHVGCGTWSRHLSVDIGQFTTAQSTWNRCLVDSCSVVNMARFCIPDSQTWNMIPLSVLFNSTMDESNPRDENEILLLSVYCGSLCKYLTVASGRASVFVLRARTKNLKSWDHAVGVICVQEAGGQISDWSGKPLDLAADL…
			OsMOC2	MDHEADAYRTDLMTITRYVLNEQSRNPEARGDLTILLSHIVLGCKFVASAVNKAGLAKLIGLAGETNVQAKEQKKLDVLSNEVFVKALVSSGRTCVLVSEEDEEATFVDPALRGKYCVCFDPLDGSSNIDCGVSIGTIFGIYMIKDKENVTLEDVLQPGKNMVAAGYCMYGSSCTLVLSTGNGVNGFTLDPSLGEFILTHPDIKIPKKGKIYSVNEGNAKNWDEPTAKFVEKCKFPKDGSSPKSLRYIGSMVADVHRTLLYGGVFLYPADKKSPNGKLRVLYEVFPMSFLMEQAGGQSFTGKERALDLVPTKIHERSPIFLGSFEDVEEIKGLYAAQAK
			OsSAL1	MSELPSPPPPAAGNQYGAEHAAAKKAVALAARLCKKVQQDLLKLDVQTKADRTPVTVADYGSQVLVSVVLKIELPSNSFSMVAEEDSEDLRKDGAQEMLGHITKLVNETIINDGSYSITLSKEDVLVAIDGGKSEGGPSGRYWILDPIDGTKGFIRGDQYAIGLALLDEGKVVLGAMACPNLPFKSIDHNGGSSGDQVGALFSATIGCGSTVESLEGSQPQKKLGIQAPPVRIDSQAKYGAVAQGDGAIYWRFPHKRSKEAVWDHAAGSIIVTEAGGLVKDASGNDLDFSKGRYLDRDAGIIATNKYLMPLVVKAAQEAMKEEGILG
			OsSAL1-1	ALLDEGKVVLGVLACPNLSLGSIGNLNGGSSGDQVGALFSATIGCGAEVESLQGSPAQKISVCSIDNPVEASFFESYEGAHSLRDLTGSIAEKLGVQAPPVRIDSQAKYGALARGDGAIYLRFPHKGYREKIWDHAAGSIVVTEAGGLVTDASGNDLDFSKGRFLDLDTGIIATNKQLMPSLLKAVQDAIKEQNQAASPL
			OsSBPASE	METVAAASYTRGAATRSPACCAAMSFSQSYRPKAARPPSTFYGESLRVNTARSLPSGRQSKAASRAALSTRCEIGDSLEEFLTKATPDKNLIRLLICMGEAMRTISFKVRTASCGGTACVNSFGDEQLAVDMLADKLLFEALEYSHVCKYACSEEVPELQDMGGPVDGGFSVAFDPLDGSSIVDTNFTVGTIFGVWPGDKLTGVTGGDQVAAAMGIYGPRTTYIIALKDCPGTHEFLLLDEGKWQHVKDTTTIGEGKMFSPGNLRATFDNPEYDKLINYYVKEKYTLRYTGGMVPDVNQIIVKEKGIFTNVTSPTAKAKLRLLFEVAPLGFLIEKAGGYSSDGKQSVLDKVINNLDERTQVAYGSKNEIIRFEETLYGSSRLTAGATVGAAA
			OsVTC4	MAEEQFLAVAVDAAKNAGEIIRKGFYQTKNVEHKGQVDLVTETDKACEDLIFNHLRKHYPDHKFIGEETSAALGATADLTDDPTWIVDPLDGTTNFVHGFPFVCVSIGLTVGKIPTVGVVYNPIMNELFTAVRGKGAFLNGSPIKTSSQNELVKALLVTEVGTKRDKATLDDTTNRINKLLFKIRSIRMCGSLALNMCGVACGRLDLCYEIGFGGPWDVAAGALILREAGGFVFDPSGGEFDLMARRMAGSNSYLKDQFIKELGDTS
	Triticum aestivum	39	TaCFBP1-4A	MAAATTTTSRPLLLSRQQAAASSLQCRLPRRPGSSLFAGQGQASTPNVRCMAVVDTASAPAPAAARKRSSYDMITLTTWLLKQEQEGVIDNEMTIVLSSISTACKQIASLVQRAPISNLTGVQGATNVQGEDQKKLDVISNEVFSNCLRWSGRTGVIASEEEDVPVAVEESYSGNYIVVFDPLDGSSNIDAAVSTGSIFGIYSPSDECHIGDDATLDEVTQMCIVNVCQPGSNLLAAGYCMYSSSVIFVLTIGTGVYVFTLDPMYGEFVLTQEKVQIPKSGKIYSFNEGNYALWDDKLKKYMDSLKEPGTSGKPYSARYIGSLVGDFHRTMLYGGIYGYPSDQKSKNGKLRLLYECAPMSFIAEQAGGKGSDGHQRVLDIMPTAVHQRVPLYVGSVEEV…
			TaCFBP1-4B	MAAATTTTSRPLLLSRQQAAASSLQCRLPRRPGSSLFAGQGQASTPNVRCMAVVDTASAPAPAAARKRSSYDMITLTTWLLKQEQEGVIDNEMTIVLSSISTACKQIASLVQRAPISNLTGVQGATNVQGEDQKKLDVISNEVFSNCLRWSGRTGVIASEEEDVPVAVEESYSGNYIVVFDPLDGSSNIDAAVSTGSIFGIYSPSDECHIDDDATLDEVTQMCIVNVCQPGSNLLAAGYCMYSSSVIFVLTIGTGVYVFTLDPMYGEFVLTQEKVQIPKSGKIYSFNEGNYALWDDKLKKYMDSLKEPGTSGKPYSARYIGSLVGDFHRTMLYGGIYGYPSDQKSKNGKLRLLYECAPMSFIAEQAGGKGSDGHQRVLDIMPTAVHQRVPLYVGSVEEV…
			TaCFBP1-4D	MAAATTTASRPLLLSRQQAAASSLQCRLPRRPGSSLFAGQGQASTPNVRCMAVVDTPSAPAVAPARKRSSYDMITLTTWLLKQEQEGVIDNEMTIVLSSISTACKQIASLVQRAPISNLTGVQGATNVQGEDQKKLDVISNEVFSNCLRWSGRTGVIASEEEDVPVAVEESYSGNYIVVFDPLDGSSNIDAAVSTGSIFGIYSPSDECHIGDDATLDEVTQMCIVNVCQPGSNLLAAGYCMYSSSVIFVLTIGTGVYVFTLDPMYGEFVLTQEKVQIPKSGKIYSFNEGNYALWDDKLKKYMDSLKEPGTSGKPYSARYIGSLVGDFHRTMLYGGIYGYPSDQKSKNGKLRLLYECAPMSFIAEQAGGKGSDGHQRVLDIMPTEVHQRVPLYVGSVEEV…
			TaCYFBP-1A	MDHAADAQRTDLMTITRHALNEQGRHPESRGDFTILLSHIVLGCKFVASAVNKAGLAKLIGLAGETNVQGEEQKKLDVLSNEVFVKALVSSGRTCVLVSEENEAAIFVDAPLRGKYCVCFDPLDGSSNIDCGVSIGTIFGIYMIKDKDNATLEDVLQPGTNMIAAGYCMYGSSCTLVLSTGNGVNGFTLDPSLGEFILTHPNIKIPNKGKIYSVNEGNARNWDAPTAKYVERCKFPQDGSSPKSLRYIGSMVADVHRTLLYGGIFLYPADKKSPNGKLRVLYEVFPMSFLMEQAGGQSFTGKQRALEIVPYEIHQRSPIFLGSYDDVEEIKSLYASESSTA
			TaCYFBP-1B	MDHAAEAQRTDLMTITRHALNEQGRHPESRGDFTILLSHIVLGCKFVASAVNKAGLAKLIGLAGETNVQGEEQKKLDVLSNEVFVKALVSSGRTCVLVSEENEAAIFVDAPLRGKYCVCFDPLDGSSNIDCGVSIGTIFGIYMIKDKDNATLEDVLQPGTDMIAAGYCMYGSSCTLVLSTGNGVNGFTLDPSLGEFILTHPNIKIPNKGKIYSVNEGNARNWDAPTAKYVERCKFPQDGSSPKSLRYIGSMVADVHRTLLYGGIFLYPADKKSPNGKLRVLYEVFPMSFLMEQAGGQSFTGKQRALEIVPAEIHQRSPIFLGSYDDVEEIKSLYASESSTA
			TaCYFBP-1D.1	MDHAAEAQRTDLMTITRHALNEQGRHPESRGDFTILLSHIVLGCKFVASAVNKAGLAKLIGLAGETNVQGEEQKKLDVLSNEVFVKALVSSGRTCVLVSEENEAAIFVDAPLRGKYCVCFDPLDGSSNIDCGVSIGTIFGIYMIKDKDNATLEDVLQPGTHMIAAGYCMYGSSCTLVLSTGNGVNGFTLDPSLGEFILTHPNIKIPNKGKIYSVNEGNARNWDAPTAKYVERCKFPQDGSSPKSLRYIGSMVADVHRTLLYGGIFLYPADKKSPNGKLRVLYEVFPMSFLMEQAGGQSFTGKHRALEIVPSEIHQRSPIFLGSYDDVEEIKSLYAAESSTA
			TaCYFBP-1D.2	MDHAAEAQRTDLMTITRHALNEQGRHPESRGDFTILLSHIVLGCKFVASAVNKAGLAKLIGLAGETNVQGEEQKKLDVLSNEVFVKALVSSGRTCVLVSEENEAAIFVDAPLRGKYCVCFDPLDGSSNIDCGVSIGTIFGIYMIKDKDNATLEDVLQPGTDMIAAGYCMYGSSCTLVLSTGNGVNGFTLDPSLGEFILTHPNIKIPNKGKIYSVNEGNARNWDAPTAKYAERCKFPQDGSSPKSLRYIGSMVADVHRTLLYGGIFLYPADKKSPSGKALEIVPSEIHQRSPIFLGSYDDVEEIKSLYASESSTA
			TaCYFBP-3A	MDHAADTFRTDLMTITRHVLNEQSRHPESRGDLTILLSHIVLGCKFVASAVNKAGLAKLTGLAGETNVQGEEQKKLDVLSNEVFVNALVSSGRTCVLVSEEDEKATFVDPKLRGKYCVCFDPLDGSSNIDCGVSIGTIFGIYMIKNQDTVTLEEVLQPGKDMIAAGYCMYGSSCTLVLSTGNGVNGFTLDPSLGEFIMTHPDIKIPPKGKIYSVNEGNAKNWDTPTAKYVEKCKYPTDGSSPKSLRYIGSMVADVHRTLLYGGIFLYPADKKSPSGKLRVMYEVFPMSFLMEEAGGQSFTGKGRSLDLIPTDIHERSPIFLGSSDDVEEIKALYAEEAKKAGSA
			TaCYFBP-3B	MDHAADTFRTDLMTITRHVLNEQSRHPESRGDLTILLSHIVLGCKFVASAVNKAGLAKLTGLAGETNVQGEEQKKLDVLSNEVFVNALVSSGRTCVLVSEEDEKATFVDPKLRGKYCVCFDPLDGSSNIDCGVSIGTIFGIYMIKNQDTVTLEEVLQPGKDMIAAGYCMYGSSCTLVLSTGNGVNGFTLDPSLGEFIMTHPDIKIPPKGKIYSVNEGNAKNWDTPTAKYVEKCKYPTDGSSPKSLRYIGSMVADVHRTLLYGGIFLYPADKKSPSGKLRVMYEVFPMSFLMEEAGGQSFTGKGRSLDLIPTDIHERSPIFLGSSDDVEEIKALYAEEAKKEGSA
			TaCYFBP-3D	MDHAADTFRTDLMTITRHVLNEQSRHPESRGDLTILLSHIVLGCKFVASAVNKAGLAKLTGLAGETNVQGEEQKKLDVLSNEVFVNALVSSGRTCVLVSEEDEKATFVDPKLRGKYCVCFDPLDGSSNIDCGVSIGTIFGIYMIKNQDTVTLEEVLQPGKDMIAAGYCMYGSSCTLVLSTGNGVNGFTLDPSLGEFIMTHPDIKIPPKGKIYSVNEGNAKNWDTPTAKYVEKCKYPTDGSSPKSLRYIGSMVADVHRTLLYGGIFLYPADKKSPSGKLRVMYEVFPMSFLMEEAGGQSFTGKGRSLDLIPTDIHERSPIFLGSSDDVEEIKALYAEEAKKAGSA
			TaFBP1-7A	MTLSPHTLRPPLPLPLPLPPTSNRRHHRPPPPPSRSRPRAVRRSELLAGDGMASHGSHPTLLEHMGRTGAPADLAVLVAHIQAACKRIAALVASPGNADLSRAKPAAAGAASAAGRDAPKPLDELSNEIILSSLQSSGKVAVVASEENDLPVWLCDDGPYVVVTDPLDGSRNIEVSIPTGTIFGIYDRLVELDQLPVEEKAQLNSLQSGSRLVAAGYVLYSSATIFCISFGAGTHGFTLDRSTGEFVLTHPSMQIPPRGQIYSVNDARYFDWPEGLKKYIDTIRQGKGQHPKKYSARYVCSLVADFHRTIIYGGVAMNPRDHLRLVYEANPLSFLAEQAGGRGSDGKTRILSIQPVKLHQRLPLFLGRMEDMLELESYGDVQQKVNPGYDV
			TaFBP1-7B	MTLSPRTLRPPLPLPLPPTSNRRPPPRPSRPRLPALARRRSSSVLLARPPRAGAGAGDGGMASHPTLLEHMGRAGAPADLAVLVAHIQAACKRIAALVASPGNADLSRAKPAAAGGASAAAGRDAPKPLDELSNEIILSSLQSSGKVAVVASEENDLPVWMCDDGPYVVVTDPLDGSRNIEVSIPTGTIFGIYDRLVELDQLPVEEKAQLNSLQSGSRLVAAGYVLYSSATIFCISFGAGTHGFTLDRSTGEFVLTHPSMQIPPRGQIYSVNDARYFDWPEGLKKYIDTIRQGKGQHPKKYSARYVCSLVADFHRTIIYGGVAMNPRDHLRLVYEANPLSFLAEQAGGRGSDGKTRILSIQPVKLHQRLPLFLGSMEDMLELESYGDVQQKVNPGYDV
			TaFBP1-7D	MTLSPHTLRPPLPLSLPLPPTSNRRPPPRPLHPSLARRRRSVLLPKPPRAGAGAGDGMATHGAHPTLLEHMGRAGAPADLAVLVAHIQAACKRIAALVASPGNADLSRAKPAAAGAASAAGRDAPKPLDELSNEIILSSLQSSGKVAVVASEENDLPVWMCDDGPYVVVTDPLDGSRNIEVSIPTGTIFGIYDRLVELDQLPVEEKAQLNSLQSGSRLVAAGYVLYSSATIFCISFGAGTHGFTLDRSTGEFVLTHPSMQIPPRGQIYSVNDARYFDWPEGLKKYIDTIRQGKGQHPKKYSARYVCSLVADFHRTIIYGGVAMNPRDHLRLVYEANPLSFLAEQAGGRGSDGKTRILSIQPVKLHQRLPLFLGSMEDMLELESYGDVQQKVNPGYDV
			TaHL-6A	MGGLRLSAWAAAPSPSPSSAAARGFPRSPPDWRGLERGSGRGRRSRCAPSSPPSASPALSLGAAGRLRVGADREWLWDCRGGGLGGGGGKKDYAKEMEAAVRVVQVACTLCQRVQDSLLLADPGSGSAGVHSKLDRSPVTVADWGVQATVSWLLSDCFGDESVSIVAEEDDKTLSSSDGTALLESVVSAVNGCLVEAPKYGLRSPEKDLGAHDVLQAIRKCSSTGGPKGRFWVLDPVDGTLGFVRGDQYAIALALIEDGEVVLGVLGCPNYPMKKEWLNYHQRYYRLMSKVAPPTSGSWNKGCVMYAHKGCGQAWMQPLVHDFGMLSWHNSREVQVSSVSDPVSATFCEPVEKANSSHSFTAGLAHSVGLRNQPLRVYSMVKYAAIARGDAEIFMKFAR…
			TaHL-6B	MGGLRLSAWAAAPSPCPSSATARGFPRSPSDWRGLRGRRGRSRCAPSSPPSASPALSLGAAGRLRVGADREWLWDCRGGGLGGGGGGKKDYAKEMEAAVRVVQVACTLCQRVQDSLLLADPGSGSGGVHSKLDRSPVTVADWGVQATVSWLLSDCFGDENVSIVAEEDDKTLSSSDGTALLESVVAAVNGCLVEAPKYGLRSPEKDLGPHDVLQAIRKCSSTGGPKGRFWVLDPVDGTLGFVRGDQYAIALALIEDGEVVLGVLGCPNYPMKKEWLNYHQRYYRLMSKVAPPTSGSWNKGCVMYAHKGCGQAWMQPLVHDFGMLSWHNSREVQVSSVSDPVSATFCEPVEKANSSHSFTAGLAHSVGLRNQPLRVYSMVKYAAIARGDAEIFMKFARAG…
			TaHL-6D	MGGLRLSAWAAAPSPSPSPSSAAARGFPRSPPDWRGSERGRRSRCAPSSPPSASPALSLGAAGRLRVGADREWLWDCRGGGLGGGGGKKDYAKEMEAAVRVVQVACTLCQRVQDALLLADPGSGSGGVHSKLDRSPVTVADWGVQATVSWLLSDRFGDESVSIVAEEDDETLSSSDGTALLESVVAAVNGCLVEAPKYGLRSPEKDLGAHDVLQAIRKCSSTGGPKGRFWVLDPVDGTLGFVRGDQYAIALALIEDGEVVLGVLGCPNYPMKKEWLNYHQRYYRLMSKVAPPTSGTWNKGCVMYAHKGCGQAWMQPLVHDFGMLSWHNSREVQVSSVSDPVSATFCEPVEKANSSHSFTAGLAHSVGLRNQPLRVYSMVKYAAIARGDAEIFMKFARAG…
			TaIMPL1-6A	MGIGSLSTKNRSAAGGKQQEGIKPFLSAPMARYLLPSSSTTAASSLPRNARASPAPILALRALASRSKHARSLMAVASDQPAAPSKYPKMAAPTTGPVPADELLGVIKAAAKAGAEVVMEAVNKPRNIQYKGVADLVTDTDKLSESVILEVVTKNFKDHLILGEEGGLIGDSLSEYLWCIDPLDGTTNFAHGYPSFSVSIGVLFRGKPAAATVVEFCGGPMCWNTRTISASSGKGAYCNGQKIHVSPTEKVEQSLLVTGFGYEHDDAWLTNINLFKEFTDVSRGVRRLGSAAADMSHVGLGITEAYWEYRLKPWDMAAGVLIVEEAGGVVTRMDGGEFTVFDRSVLVSNGTVHDQLLERIRPATEDLKKKGIDFSRWFKPDNYPTDF
			TaIMPL1-6B	MARYLLPSTTTAASSLPRNARASPAPILALRSLASRSKHARAIMAVASSQPAAPSKYPKMAAPTTGPVPADELLGVIQAAAKAGAEVVMEAVNKPRNIQYKGVADLVTDTDKLSESVILEVVTKNFKDHLILGEEGGLIGDSLSEYLWCIDPLDGTTNFAHGYPSFSVSIGVLFRGKPAAATVVEFCGGPMCWNTRTISASSGKGAYCNGQKIHVSPTEKVEQSLLVTGFGYEHDDAWLTNINLFKEFTDVSRGVRRLGSAAADMSHVGLGITEAYWEYRLKPWDMAAGVLIVEEAGGVVTRMDGGEFTVFDRSVLVSNGTVHDQLLERIRPATEDLKKKGIDFSMWFKPENYPTDF
			TaIMPL1-6D	MARYLLPSTTTAASSFPRNARASPAPILAPRALASRSKHARAIMAVASDQPAAPSKYPKMAAPTTGPVPADELLGVIQAAAKAGAEVVMEAVNKPRNIQYKGVADLVTDTDKLSESVILEVVTKNFKDHLILGEEGGLIGDSLSEYLWCIDPLDGTTNFAHGYPSFSVSIGVLFRGKPAAATVVEFCGGPMCWNTRTISASSGKGAYCNGQKIHVSPTEKVEQSLLVTGFGYEHDDAWLTNINLFKEFTDVSRGVRRLGSAAADMSHVGLGITEAYWEYRLKPWDMAAGVLIVEEAGGVVTRMDGGEFTVFDRSVLVSNGTVHDQLLERIRPATEDLKKKGIDFSMWFKPDNYPTDF
			TaIMPL2-3A	MLPPICTIPLTFPLPNPAFTKPSLRHHLRSPSLLATFSSAAAGRACGIAGRWMGSVRASPSEAGGWAVAAAGKEGVEMERLVAVAQSAADAAGEVLRKYFRQRFEIIDKEDHSPVTIADREAEEAMTSVILKSFPTHAVFGEENGWRCAEKSADYVWVLDPIDGTKSFITGKPLFGTLIALLHNGKPVMGIIDQPILRERWVGVDGKKTTLNGQEISVRPCNVLAQAYLYTTSPHLFEGDAEDAFIRVRDKVKVPLYGCDCYAYALLASGFVDLVVESGLKPYDFLSLVPVIEGAGGSITDWEGNKLHWPVSSESQPTSFNVVAAGDSRVHGQALAALRWR
			TaIMPL2-3B	MLPPISTIPPTFPLPHPAFAKPSLRHHLRSPSLLATFSSAAAGRACGIAGRWMGSVRASPSEAGGWAVAAAGKEGVEMERLVAVAQSAADAAGEVLRKYFRQRFEIIDKEDHSPVTIADREAEQAMTSVILNSFPTHAVFGEENGWRCAEKSADYVWVLDPIDGTKSFITGKPLFGTLIALLHNGKPVMGVIDQPILRERWVGVDGKKTTLNGQEISVRPCNVLEQAYLYTTSPHLFEGDAEDAFIRVRDKVKVPLYGCDCYAYALLASGFVDLVVESGLKPYDFLSLVPVIEGAGGSITDWEGNKLHWLVSSESRPTSFNVVAAGDSRVHGQALAALRWR
			TaIMPL2-3D	MLPPISTIPPTFPLPHPAFTKPSLPYHLRSPSLLATFSSSAAGRACGIAGRWMGSVRASPSEAGGWAVAAAGKEGVDMERLVAVAQSAADAAGEVLRKYFRQRFEIIDKEDHSPVTIADREAEEAMTSVILKSFPTHAVFGEENGWRCAEKSADYVWVLDPIDGTKSFITGKPLFGTLIALLHNGKPVMGIIDQPILRERWVGVDGKKTTLNGQEISVRPCNVLEQAYLYTTSPHLFEGDAEDAFIRVRDKVKVPLYGCDCYAYALLASGFVDLVVESGLKPYDFLSLVPVIEGAGGSITDWEGNKLHWPVSSESRPTSFNVVAAGDSHVHGQALAALRWR
			TaIMPL3-2A	MPLLHLSLPPHRLLVGRRRLFAPPTPPPSRISIRAAALISSAAEDGSDLPFPPERAPHHRELAAAAASVERACRLCVDVKRSLLSGGRKILEKNDQSPVTIADFGVQALISFELQQLFPSIPLVAEEDSTFLKSSNPDDNSGNVLIESISSAVTDKVKNSGSPLTHDDVLRAIDRGGKDAVSFDSNPATYWVLDPIDGTKGFLKGDDALYVVGLALVVNGKVAVGVMGCPNWTTANKKEENLDPCPGNGILMVSHVGCGTWSRHLSPEIGQLTTAQDVWKRCFVDACSVVHMARFCIPDSQTWNMIPLSLLFDSTTDESDTRDENKILLRYACCGSLCKYIMVASGRASVFFSRARVNTQIKAWDHAVGMICVQEAGGQISDWSGKPLDLAADLTGRRI…
			TaIMPL3-2B	MPLLHLSLPPHRLLVGRRRLFAPPTPPPSRISIRAAALISSAAEDGCDLPFPPERAPHHRELAAAAASVERACRLCVDVKRSLLSGGRKILEKNDQSPVTTADFGVQALISFELQQLFPSIPLVAEEDSTFLKSSNPDDNSGNVLIESISSAVAGKVKNSCSPLTHDDVLRAIDRGGKDAVSFDSNPATYWVLDPIDGTKGFLKGDDALYVVGLALVVNGKIAVGVMGCPNWTNGTTANKKEENLDPCPSNGILMVSHVGCGTWSRHLSPEIGQFTTAQDVWKRCFVDACSVVHMARFCIPDSQTWNMIPLSLLFDSTTDESDTRDENKILLRYACCGSLCKYIMVASGRASVFFSRARVNTQIKAWDHAVGMICVQEAGGQISDWSGKPLDLAADLTG…
			TaIMPL3-2D	MPLLHLSLPAHRLLVGRRRLFAPLTPPPSRISIRAAALISSAAEDGCDLPFPPERAPHRRELAAAAASVERACRLCVDVKRSLLSGGRKILEKNDQSPVTIADFGVQALISFELQQLFPSIPLVAEEDSTFLKSSNPDDNSGNVLIESISSAVADKVKNSGSPLTHDDVLRAIDRGGKDAVSFDSNPATYWVLDPIDGTKGFLKGDDALYVVGLALVVNGKVAVGVMGCPNWTNGTTANKKEENLDPCPGNGILMVSHVCCGTWSRHLSPEIGQFTTAQDVWKRCFVDACSVVHMARFCIPDSQTWNMIPLSVLFDSTTDESDTRDENKILLRYACCGSLCKYIMVASGRASVFFSRARVNTQIKAWDHAVGMICVQEAGGQISDWSGEPLDLAADLTG…
			TaIMPL3-6A	MRTRIPAKKESAVLLPPHARTHTHMPLLHPSLPPHRLLVVRQCRLIAPPVHPPSRLSVRAAAAAPVAHEVCALPFPPDRASHHRELAAAVASVERACRLCVDVRASMLVGDEKILEKNDQTHVTIADFGVQALISFELQQLFPSIPLVAEEDSAFIRSSNTADSKSNTLVESISSFFTKHVNNNGPPLTHDDVLRAIDRGGKDAVSFDSNPATYWLLDPIDGTKGFLKGEDSLYVVGLALVVDGKLAVGVMGCPNLTETTVGDTEDESIAACPGHGILMVSHVGCGTWSRPMSAEIGQLTTAPDVWKRCSVDPCSVAQMARFCIVDSHTWDMMPLSAHFSSTMDESEPRDENKILLQNSCGGSLSKYLLVACGRMSVFILLARAEKLLKAWDHAVGVIC…
			TaIMPL3-6B	MPLLHLSLPPHRLLVVRQCRLIAPPLHPPSRLSVRAAAAAPVAHEVCALPFPPDRTSHHRELAAAVASVERACRLCVDVRASMLVGDEKILEKNDQTHVTIADFGVQALISFELQQLFPSIPLVAEEDSAFIRSSSATDSNSNTLVESISSFVSKEVSNNGPPLTHDDVLRAIDRGGKDVVSFDSNPATYWLLDPIDGTKGFLKGEDSLYVVGLALVVDGKLALGVMGCPNLTDTTVGDTEDESIAAYPGHGILMVSHVGCGTWSRPMSAEIGQLTTAADVWKRCYVDPCSVAHMARFCIVDSHTWDMMPLSAHFSSTMDESEPRDENKILLQNSCGGSLSKYLLVACGRMSVFILLARAEKLLKAWDHAVGVICVEEAGGQTCDWSGKPLDFGADLTG…
			TaIMPL3-6D	MRTRIPCKKESAVLLPPHARAHTHMPLLHPSLPPHRLLVVRQCRLIAPPVHPLSRLSVRAASVAHEVCALPFPPDRASHHRELTAAVASVERACRLCVDVRASMLVGDEKILEKNDQTHVTIADFGVQALISFELHQLFPSIPLVAEEDSAFIRSSNAADSKSNTLVESISSFFTKHVNNNGPPLTHDDVLRAIDRGGKDAVSFDSNPATYWLLDPIDGTKGFLKGEDSLYVVGLALVVDGKLAVGVMGCPNLTDTTVGDTEDESIAACPGHGILMVSHVGCGTWTRPMSADQLTTAPDIWKRCSVDPCSVAHMARFCIVDSHTWDMMPLSAHFSSTMDESEPRDENKILLQNSCGGSLSKYLLVACGRMSVFILLARAEKLLKAWDHAVGVICVEEAG…
			TaSAL1-4A	MSRPAGNPPYAAELGAAKKAVALAARLCQTVQREIVQSDIQSKADKTPVTVADYGSQVLVSLVLNKEITSGSFSMVAEEDSEDLRKDGAEEILERITDLVNKTLAEDGSYNISLSKEAILSAIDTGKSEGGPSGRHWVLDPIDGTKGFVRGGQYAIALALLDEGRVVLGVLGCPNLPFTSTSNLSGSSSGDQTGALFSAAIGCGAEVQSLDGSPPQKISVCTIDNPANASFFESYEGAHTMRDFTGSVAEKLGVQAPPVRIDSQAKYGALARGDGAIYWRFPHEGYRETIWDHAAGSIVVTEAGGVVKDASGNDLDFSKGRFLDRDTGIIATNKQLMPSVLKSVQEAIKEKKLASSPL
			TaSAL1-5A	MPTGGHSVVPCTTVVTTSDHFIPFLCITNYTFKTISYINSYNTSSVISVRTVQQEILQSDIQSKADKSPVTVADYGSQVLVSLALNMEVTSGSFSMVAEEDSEDLRKDNAEEILEHITDLVNETLAENGSYNITLSKEGILSAIDTGKSEGGPSGRHWVLDPIDGTKGFLRGGQYAIALALLDEGKVVLGVLGCPNLPLTSISNLNGSSSGDQTGALFSATIGCGAEVESLEGSPPQKISVCTIDNPVNASFFESYEGAHTMHDLTGSIAEKLGVQAPPVRIDSQAKYGALACGVGAIYLRFPHKGYKEKIWDHAAGAIVVTEAGGVVTDASGNDLDFSKGRFLDVDTGIIATNKQLMPSLLKSVQEAIKEKSQAPSPL
			TaSAL1-5B	MASRVGLLLAPSSSLALNPPRPRLPYPLLSHHLGRPTYRRIASSAPLRSPLWWPRQAPSLFAARAMSGSAGSPPYAAELAAAKKAVALAARLCQTVQQEILQSDIQSKADKSPVTVADYGSQVLVSLVLNMEVTSGSFSMVAEEDSEDLRKDSAEEILEHITDLVNETLAEDGSYNITLSKEGILSAIDTGKSEGGPSGRHWVLDPIDGTKGFLRGGQYAIALALLDEGKVVLGVLGCPNLPLTSISNLNGSSSGDQTGALFSATIGCGAEVESLEGSPPQKISVCTIDNPVNASFFESYEGAHTMHDLTGSIAEKLGVQAPPVRIDSQAKYGALARGDGAIYLRFPHKGYKEKVWDHAAGAIVVTEAGGVVTDASGNDLDFSKGRFLDVDTGIIATNK…
			TaSAL1-5D	MASRVGLLLAPSSSLARNPPRARLPYPLPSHHLGRPTYRRFASSAPLRSPLWWPRQAPPLFSARAMSGSAGSPPYAAELAAAKKAVALAARLCQTVQQEILQSDIQSKADKSPVTVADYVHVGSQVLVSLALNMEVTSGSFSMVAEEDSEDLRKDSAEEILEHITDLVNETLAEDGSYNITLSKEGILSAIDTGKSEGGPSGRHWVLDPIDGTKGFLRGGQYAIALALLDEGKVVLGVLGCPNLPLASISNLNGSSCGDQMGALFSATVGCGAEVESLEGSPPQKISVCTIDNPVNASFFESYEGAHTMHDLTGSIAEKLGVQAPPVRIDSQAKYGALARGDGAIYLRFPHKGYKEKIWDHAAGAIVVTEAGGVVTDASGNDLDFSKGRFLDVDTGIIA…
			TaSAL1-7A	MSRPAGNPSYAAELGAAKKAVALAARLCQTVQQEIVQSDIQSKADKTPVTVADYGSQVLVSVVLNMEVTSGSFSMVAEEDSEDLRKDGAEEILERITDLVNKTLAEDGSYNLLLSKEAILSAIDTGKSEGGPSGRHWVLDPIDGTKGFVRGGQYAIALALLDEGRVVLGVLGCPNLPFTSVSNLSGSSSGNQTGALFSAAIGCGAEVQSLDGSPPQKISVCTIDNPANASFFESYEGAHSMRDFTGCVAEKLGVQAPPVRIDSQAKYGALARGDGAIYWRFPHEGYRETVWDHAAGSIVVTEAGGVVKDASGNDLDFSKGRYLDRDTGIIATNKQLMPSVLKSVQEAIKEKKQASSPL
			TaSBPASE-3A	METVAAAGYAHGAATRSPACCAAMSFSQSYRPKAARPATSFYGESLRANTARTSFPAGRQSKAASRAALTTRCAIGDSLEEFLTKATPDKNLIRLLICMGEAMRTIAFKVRTASCGGTACVNSFGDEQLAVDMLADKLLFEALEYSHVCKYACSEEVPELQDMGGPVEGGFSVAFDPLDGSSIVDTNFTVGTIFGVWPGDKLTGVTGGDQVAAAMGIYGPRTTFVVALKDCPGTHEFLLLDEGKWQHVKDTTSIGEGKMFSPGNLRATFDNPDYDKLVNYYVKEKYTLRYTGGMVPDVNQIIVKEKGIFTNVTSPTAKAKLRLLFEVAPLGFLIEKAGGHSSDGKQSVLDKVISVLDERTQVAYGSKNEIIRFEETLYGSSRLAASATVGATA
			TaSBPASE-3B	METVAAAGYARGAATRSPACCAAMSFSQSYRPKAARPATSFYGESLRANTARTSFPAGRQSKAASRAALTTRCAIGDSLEEFLTKATPDKNLIRLLICMGEAMRTIAFKVRTASCGGTACVNSFGDEQLAVDMLADKLLFEALEYSHVCKYACSEEVPELQDMGGPVEGGFSVAFDPLDGSSIVDTNFTVGTIFGVWPGDKLTGVTGGDQVAAAMGIYGPRTTFVVALKDCPGTHEFLLLDEGKWQHVKDTTTIGEGKMFSPGNLRATFDNPDYDKLVNYYVKEKYTLRYTGGMVPDVNQIIVKEKGIFTNVTSPTAKAKLRLLFEVAPLGFLIEKAGGHSSDGKQSVLDKVISVLDERTQVAYGSKNEIIRFEETLYGSSRLAASATVGATA
			TaSBPASE-3D	METVAAAGYARGAATRSPACCAAMSFSQSYRPKAARPATTFYGESLRANTARTSFPAGRQSKAASRAALTTRCAIGDSLEEFLTKATPDKNLIRLLICMGEAMRTIAFKVRTASCGGTACVNSFGDEQLAVDMLADKLLFEALEYSHVCKYACSEEVPELQDMGGPVEGGFSVAFDPLDGSSIVDTNFTVGTIFGVWPGDKLTGVTGGDQVAAAMGIYGPRTTFVVALKDCPGTHEFLLLDEGKWQHVKDTTTIGEGKMFSPGNLRATFDNPDYDKLVNYYVKEKYTLRYTGGMVPDVNQIIVKEKGIFTNVTSPTAKAKLRLLFEVAPLGFLIEKAGGHSSDGKQSVLDKVISQLDERTQVAYGSKNEIIRFEETLYGSSRLAASATVGATA
			TaVTC4-4A	MAEEQFLAAAVDAAKSAGEVDLVTETDKACEDLIFNHLRMLYPDHKFIGEETSAALGSTDDLTYDPTWIVDPLDGTTNFVHGFPFVCVSIGLTIGKIPTVGVVYNPIMNELFTAVRGKGAFLNGSPIKTSPQNELVKALMVTEVGTKRDKPTLDDTTNRINKLLFKIRSIRMCGSLALNMCGVACGRLDLCYEIGFGGPWDVAAGALILKEAGGFVFDPSGDAFDLMAQRMAGSNGHLKDQFIKALVDAS
			TaVTC4-4B	RPKKRLLTVSAPSPWAHHPAERSCTGNIKFPLRSLEAGDSEAMAEEQFLAAAVGAAKSAGEIIRKSFYLSKKVEHKGQVDLVTETDKACEDLIFNHLRMLYPDHKFIGEETSAALGSTDDLTYDPTWIVDPLDGTTNFVHGFPFVCVSIGLTIGKIPTVGVVYNPIMNELFTAVRGKGAFLNGSPIKTSPQNELVKALMVTEVGTKRDKSTLDDTTNRINKLLFKIRSIRMCGSLALNMCGVACGRLDLCYEIGFGGPWDVAAGALILKEAGGFVFDPSGDEFDLMAQRMAGSNGHLKDQFIKALGDAS
			TaVTC4-4D	MAEEQFLAAAVGAAKSAGEIIRKSFYLTKNVEHKGQVDLVTETDKACEDLIFNHLRMLYPDHKFIGEETSAALGSTDDLTYDPTWIVDPLDGTTNFVHGFPFVCVSIGLTIGKIPTVAVVYNPIMNELFTAVRGKGAFLNGSPIKTSPQNELVKALMVTEVGTKRDKSTLDDTTNRINKLLFKIRSIRMCGSLALNMCGVACGRLDLCYEIGFGGPWDVAAGALILKEAGGFVFDPSGDEFDLMAQRMAGSNGHLKDQFIKALGDAS
	Hordeum vulgare	13	HvCFBP1	MAAATTTTSRPLLLSRQQAAASSIQCRLPRRPGSSLFAGQAQASTPNVRCMAVVDTASAAAPAAAKKRNSYDMITLTTWLLKQEQDGVIDNEMTIVMSSISTACKQIASLVQRAPISNLTGVQGATNVQGEDQKKLDVISNEVFSNCLRWSGRTGVIASEEEDVPVSVEESYSGNYIVVFDPLDGSSNIDAAVSTGSIFGIYSPSDECHIGDDATIDEVTQMCIVNVCQPGSNLLAAGYCMYSSSVIFVLTIGTGVYVFTLDPMYGEFVLTQEKVQIPKSGKIYSFNEGNYALWDDKLKKYMDSLKDPGTSGKPYSARYIGSLVGDFHRTMLYGGIYGYPSDQKSKNGKLRLLYECAPMSFIAEQAGGKGSDGHQRVLDIMPTEVHQRVPLYVGSVEEV…
			HvCYFBP	MDHAADTFRTDLMTITRHVLNEQSRHPESRGDLTILLSHIVLGCKFVASAVNKAGLAKLTGLAGETNVQGEEQKKLDVLSNEVFVNALVSSGRTCVLVSEEDEEATFVDPKLRGKYCVCFDPLDGSSNIDCGVSIGTIFGIYMIKNQDTVTLEEVLQPGKDMIAAGYCMYGSSCTLVLSTGNGVNGFTLDPSLGEFIMTHPDIKIPPKGKIYSVNEGNAKNWDTPTAKYVEKCKYPTDGSSPKSLRYIGSMVADVHRTLLYGGIFLYPADKKSPNGKLRVMYEVFPMSFLMEEAGGQSFTGKGRSLDLIPTDIHERSPIFLGSSDDVEEIKALYAEEAKKAGSA
			HvCYFBP1-1	MDHAAEAQRTDLMTITRHALNEQGRHPESRGDFTILLSHIVLGCKFVASAVNKAGLAKLIGLAGDTNIQGEEQKKLDVLSNEVFVKALISSGRTCLLVSEENEAAIFVDAPLRGKYCVCFDPLDGSSNIDCGVSIGTIFGIYMIKDKDNATLEDVLQPGTDMIAAGYCMYGSSCTLVLSTGNGVNGFTLDPSLGEFILTHPNIKIPSKGKIYSVNEGNARNWDGPTAKYVERCKFPQDGSSPKSLRYIGSMVADVHRTLLYGGIFLYPADKKSPNGKLRVLYEVFPMSFLMEQAGGQSFTGKQRALEIVPCDIHQRSPIFLGSYDDVEEIKLLYASESSTA
			HvFBP1	MTLSPHTLCPPLLPPLPPSSNRRPPPPRSRPCPRILLPALAGRRSRVHLARPPRAGAGAGDGMASQDAHYPTLLEHMGRAGAPADLAVLVAHIQAACKRIAALVASPGNADLSRAKPAAAAGGASAAGRDAPKPLDELSNEIILSSLQSSGKVAVVASEENDLPVWMCDDGPYVVVTDPLDGSRNIEVSIPTGTIFGIYDRLVELDHLPVEEKAQLNSLQSGSRLVAAGYVLYSSATIFCISFGEGTHGFTLDRSTGEFVLTYPFMQIPPRGQIYSVNDARYFDWPEGLKKYIDTIRQGKGQNPKKYSARYVCSLVADFHRTVIYGGVAMNPRDHLRLVYEANPLSFLAEQAGGRGSDGKTRILSIQPVKLHQRLPLFLGSMEDMLELESYGDVQQKVN…
			HvHL	MGGLRLSAWAAAPSPSPATAGPRGFPRSPPDWRGPERGRRGRCAPSSPPALSLGAAGRLRVGADREWLWDCRGGGLGGGGGGEKDYAKEMEAAVRVVQVACTLCQRVQDSLLLADPGSGSGSGSGGVHSKLDRSPVTVADWGVQATVSWLLSDCFGDESVSIVAEEDDKTLSSSDGTALLESVVAAVNGCLVEAPKYGLRSPEKDLGAHDVLQAIRKCSSTGGPKGRFWVLDPVDGTLGFVRGDQYAIALALIEDGEVVLGVLGCPNYPMKKEWLNYHQRYYRLMSKVAPPTSGSWNKGCVMYAHKGCGQAWMQPLVHDFGMLSWHNSREVQVSSVSDPVSATFCEPVEKANSSHSFTAGLAHSVGLRNQPLRVYSMVKYAAIARGDAEIFMKFARAGY…
			HvIMPL1	MARYLLPSTTATATASSLPGNARASPAPILALRALASRSKHVRAIMAVASDRPAAPSKYPKVAAPTTGPVPADELLGVIQAAAKAGAEVVMEAVNKPRNIQYKGVADLVTDTDKLSESVILEVVTKNFRDHLILGEEGGLIGDSLSEYLWCIDPLDGTTNFAHGYPSFSVSIGVLYRGKPAAATVVEFCGGPMCWSTRTISASSGKGAYCNGQKIHVSPTEKVEQSLLVTGFGYEHDDAWLTNINLFKEFTDVSRGVRRLGSAAADMSHVGLGITEAYWEYRLKPWDMAAGVLIVEEAGGVVTRMDGGEFTVFDRSVLVSNGVVHDQLLERIRPATEDLKKKGIDFSLWFKPDKYPTDF
			HvIMPL2	MLPPTSTIPPTFPLPHPAFTKPSFRHHLRSSSLLASASSAAAGRACGIAGRWTSSVRASPSEAGGWAVAAAGKEGVEMERLVAVAQSAADAAGEVLRKYFRQRFEIIDKEDHSPVTIADREAEEAMTSVILKSFPTHAVFGEENGWRCAEKSADYVWVLDPIDGTKSFITGKPLFGTLIALLHNGKPVMGIIDQPILRERWVGVDGKKTTLNGQEISVRPCNVLSQAYLYTTSPHLFEGDAEDAFIRVRDKVKVPLYGCDCYAYALLASGFVDLVVESGLKPYDFLSLVPVIEGAGGSITDWEGNKLHWPVSSESRPTSFNVVAAGDSRVHGQALAALRWR
			HvIMPL3	MPLLHLSLPPHRLLVGRRRLFAPPTPPPSRISIRAAAEDGCDLPFLPERAPHHRELAAAAASVERACRLCVDVKRSLLSGGRKILEKNDQSPVTIADFGVQALISFELQQLFPSIPLVAEEDSAFLKSSNPDDNSGNLLIESISSAVADKVKNRGSTLTHDDVLRAIDRGGKDAVSFDSNPATYWVLDPIDGTKGFLKGDDALYVVGLALVVNGKVAVGVMGCPNWTNDTTENKKEENLDACPGNGILMVSHVGCGTWSRHLSPEIGQFTTAQDVWKRCFVDACSVVHMARFCIPDSQTWNMIPLSLLFDSTTDESDTRDGNKILLRYACCGSLCKYIMVASGRASVFFSRARVNTQIKAWDHAVGMICVQEAGGQISDWSGEPLDLAADLTGRRILYP…
			HvIMPL3-1	MPLLHPSPPPHRLLVVRQCRLIAPPVHHPSRLSVRAAAAAAPVAHEVCALPFPPDRASHHRELAAAVASVERACRLCVDVRESMLVGDEKILEKNDQTHVTIADFGVQALISFELQQLFPSIPLVAEEDSAFIRSSNAADSNSNTLVESISSFVTQKVNNNGPPLTHDDVLRAIDRGGKDAVSFDSNPATYWLLDPIDGTKGFLKGEDSLYVVGLALVVDGKLALGVMGCPNLTDTTIGDTEDESIAACPGHGIIMVSHAGCGTWSRPMSAEIGQLTTLPNVWKRCSVDPCSVAHMAHFCIVDSHTWDMMPLSAHFISTMDESEPRDENKILLQNSCGGSLSKYLLVACGRMSVFILLARAEKLLKAWDHAVGVICVEEAGGQTCDWSGKPLDFGADLT…
			HvSAL1	MASRVGLLLVPYSLVRNPSRARLPYPLPSHHLDRPTYRRFGSSAPLRCPLVWPRQAPSLFAARAMSGSPGKPPYAAELAAAKKAVALAARLCQTVQQEIVQSDIQSKADKSPVTVADYGSQVLVSLALNMEATSGSFSMVAEEDSEDLRKDSAEEILEHITDLVNETLAEDGSYNITLSKEGILSAIDTGKSEGGPSGRHWVLDPIDGTKGFLRGGQYAIALALLDEGKVVLGVLGCPNLPLTLISNLDGSSSGDQTGALFSATIGCGAEVESLEGSPPQKISVCTIDNPVNASFFESYEGAHTMHDLTGSIAEKLGVQAPPVRIDSQAKYGALARGDGAIYLRFPHKGYKEKIWDHAAGAIVVTESGGVVTDASGNDLDFSKGRFLDVDTGIIATNKQ…
			HvSAL1-1	MSRPAGNPPYAVELGAAKKAVSLAARLCQTVQQEIVQSDIQSKADKTPVTVADYGSQVLVSLVLNMEVTSGSFSMVAEEDSEDLRKDGADEILERITDLVNKTLAEDGSYNILLSKEAILSALDTGKSEGGPSGRHWVLDPIDGTKGFVRGGQYAIALALLDEGKVVLGVLGCPNLPLTSISNLSDSSSRDKTGALFSAAIGCGAEEQSLDGSPPQKISVCTIDNPVNASFFESYEGAHTMRDFTGSVAEKLGVQAPPIRIDSQAKYGAVARGDGAIYWRFPDEGYRETIWDHAAGSIVVTEAGGVVKDASGNDLDFSKGRFLDRDTGIIATNKQLMPSVLKSVQEAIKEKKQASSPL
			HvSBPASE	METVAAAGYARGAATRSPACCAAMSFSQSYRPKAARPATSFYGESLRANTARTSFPAGRQSKAASRAALTTRCAIGDSLEEFLTKATPDKNLIRLLICMGEAMRTIAFKVRTASCGGTACVNSFGDEQLAVDMLADKLLFEALEYSHVCKYACSEEVPELQDMGGPVEGGFSVAFDPLDGSSIVDTNFTVGTIFGVWPGDKLTGVTGGDQVAAAMGIYGPRTTFVVALKDCPGTHEFLLLDEGKWQHVKDTTSIGEGKMFSPGNLRATFDNPDYDKLVNYYVKEKYTLRYTGGMVPDVNQIIVKEKGIFTNVTSPTAKAKLRLLFEVAPLGFLIEKAGGHSSDGKQSVLDKVITVLDERTQVAYGSKNEIIRFEETLYGSSRLAASATVGATA
			HvVTC4	MAEEQFLAVAVDAAKSAGEIIRKSFYLTKNVEHKGQVDLVTETDKACEDLIFNHLRMLYPDHKFIGEETSAALGSTDDLTYDPTWIVDPLDGTTNFVHGFPFVCVSIGLTIGKIPTVGVVYNPIMNELFTAVRGKGAFLNGSPIRTSPQNELVKALMVTEVGTKRDKSTLDDTTNRINKLLFKIRSIRMCGSLALNMCGVACGRLDLCYEIGFGGPWDVAAGALILKEAGGFVFDPSGDEFDLMAQRMAGSNGHLKDQFIEALGDAS
	Setaria italica	11	SiCFBP1	MAAAAATSSHLLLLSRQQAASLRCRLSFLGQSRRPASRGAASGASVRCMAAVDTAPAATEASSTKSSYEIVTLTTWLLKQEQAGVIDNEMTIVLASISTACKQIAALVQRAPISNLTGVQGAVNVQGEDQKKLDVVSNEVFSNCLKSSGRTGVIASEEEDVPVAVEESYSGNYIVVFDPLDGSSNIDAAVSTGSIFGIYAPNDECLADVENSGTLDSVEQRCVVSVCQPGSNLLAAGYCMYSSSVIFVLTLGAGVYVFTLDPMYGEFVLTQEKVQIPKAGKIYAFNEGNYALWDDKLKKYMDSLKEPGDSGKPYSARYIGSLVGDFHRTLLYGGIYGYPRDRKSKNGKLRLLYECAPMSFIVEQAGGKGSDGHQRILDITPTEIHQRVPLYIGSVEEVD…
			SiCYFBP	MDHEADAHRTDLMTITRHVLNEQSRYPESRGDFTILLSHIVLGCKFVASAVSKAGLAHLIGLAGETNVQGEEQKKLDVLSNEVFVKALVSSGRTCVLVSEEDEEATFVDPKLRGKYCVCFDPLDGSSNIDCGVSIGTIFGIYMIKDKDNVTLEDVLQPGKDMLAAGYCMYGSSCMLVLSTGSGINGFTLDPSLGEFILTHPDIKMPKKGKIYSVNEGNARNWDAPTAKFVEKCKYPTDGSSPRSLRYIGSMVADVHRTLLYGGVFLYPADEKNPNGKLRVLYEVFPMSFLMEQAGGQSFTGKERALDLVPTKIHERSPVFLGSYDDVEEIKALYAEQAKSSSA
			SiCYFBP1-1	MDHAAEAQRTDLMTITRHVLNEQSRHPESRGDFTILLSHIVLGCKFVASAVNKAGLAKLIGLAGETNVQGEEQKKLDVLSNEVFVKALVSSGRTCVLVSEENEEAIFVDPALRGKYCVCFDPLDGSSNIDCGVSIGTIFGIYMIKDKDNVTLDDVIQPGTNMLAAGYCMYGSSCTLVLSTGNGVNGFTLDPSLGEFILTHPNIKIPKKGKIYSVNEGNAKNWDAPTAKYVEKCKFPQDGSSPKSLRYIGSMVADVHRTLLYGGIFLYPADQKSPNGKLRYIKADNLSLTISRTVVQMLITIVIIVIKNAYKYTNPELGSMWNNSVLYEVFPMSFLMEQAGGQAFTGKQRALELAPTKLHERSPIFLGSYDDVEEIKALYASESSTV
			SiFBP1	MPLSSSLSSFLVLRHHPPRSLPPTSNRPPLHLRLLLPPFARRRAFVCQPLAAAATDDMAAAAAAASPPTLLEHMGQAGAAADLTVLVAHIQSACKRIASLVASPGNAELSRAKAAGGGGVAADRDAPKPLDELSNDIILSSLKSSGKVAVLASEENDLPIWISDDGPYVVVTDPLDGSRNIEVSIPTGTIFGIYNRLVELDHLPLEERAQLNSLQSGTRLVAAGYVLYSSATILCISFGAGTHAFTLDWSTGEFILTHPSLQIPPRGQIYSVNDARYFDWPEGLRKYIDTIRQGKGQHPKKYSARYVCSLVADFHRTLIYGGVAMNPRDHLRLVYEANPLSFLAEQAGGRGSDGKNRILLIQPIKLHQRLPLFLGSMEDMLELESYGDVQQKVNPGYEV
			SiHL-1	MGSLRLTGWAAAASAQRGFPAAAAPEWGARRRRRCHGAPMARLRCAPSPAPAVASSLGVGAAGQLQVGAEREWLWDCRGDVGGGARDYAREMEVAVRVVQVACTLCQRVQDSLLRPGADAGGRVHSKLDRSPVTVADWGVQAIVSWLLSNSFQDENVSIVAEEDDETLSSCDGAALLESVVEAVNGCLIEAPKYGLRPPEKELRAHDVIQAIRKCSSTGGPKGRFWVLDPVDGTLGFVRGDQYAIALALIEDGEVILGVLGCPNYPMKKEWLNYHQKYYRLISKVAPPPLGSWHKGCVMYAQKGCGQAWMQPLVHDFGKLDWRHPREIQVSSISDPVSATFCEPVEKANSSHSFTAGLAQSVGLRNQPLRVYSMVKYAAIARGDAEIFMKFARAGYKEK…
			SiIMPL2	MVSVILKSFPTHAIFGEENGWRCVENSADYVWVLDPIDGTKSFITGKPLFGTLIALLHNGKPVIGVIDQPILRERWIGVDGKQTTLNGQEISVRSCNSLAQVYLYTTSPHLFEGDAEDAFIRVRDKVKVPLYGCDCYAYALLASGFVDLVVESGLKPYDFLSLVPVIEGAGGSITDWRGGKLYWPVTADSRPTSFNVVAAGDARVHKQALDALQWR
			SiIMPL3	YVANIPTEYVYVFRAAASQPRRASRSRHTQPCRSSTSRSRRTASSSPAAAGCASRRLPVIPASHSGEQTHDPPPDPNPTLSSHAREFKNPTAAAASAHSCSFLDRAAAGDAAVSVAAETYGLPFPPERASHHHELAAAIAAVERACRLCVDVKRSLFSGGKSILEKNDQTPVTIADFGVQALVSLELQRLFPSIPLVAEEDSASLRSSEADDNSSDVLVESIFSAVADKVSNSGSPLTQDDVLRAIDRGGKDAVSFDSNPATYWVLDPIDGTKGFLRGDDALYVVGLALVVNGKVTVGVMGCPNWTNYTVANGKDDSAAACNGRGILMISHLGCGTWTRRLSAEIGQFTTAPDIWKRCFVDTCSVVHMARYCIPDSQTWDMIPLSVLFNSTTGESDPRN…
			SiSAL1	MAARVGLVLPHALLASSRALTSCRARARLPNPPPTFPTTYHRSASSSAASPPRLRSRSHRASPRVLPVRSMASGNPYAAELAAAKKAVTLAARLCKTVQQDIVHSGIQSKADKSPVTVADYGSQILVSLALTMEVSGPFSLVAEEDSEELRKDGAEEILEEITDLVNETIVDDGSYNISFSKEGILSAIDDGKSEGGSSGRHWVLDPIDGTKGFLRGDQYAIALALLDEGKIVLGVLACPNLPLSSISNPNGSSSGNQVGALFSATIGCGAEVESLDGSPPQKIGVCSIDNPVNASFFESYESAHSMHDLTSSIAEKLGVLAPPVRIDSQAKYGALARGDGAIYLRFPHKGYREKIWDHAAGSIVVTEAGGIVTDAAGNDLDFSQGRFLDLDTGIIATN…
			SiSAL2	MSQHPEAAANPYAAELAAAKKAVALASRLCRRVQQGILQSDIQSKADRTPVTVADYGSQVLVSLVLKKELPSHSFSMVAEEDSEDLRKDDAQEILEHITSLVNETIANDDSYNMSLSKEDVLAALDGGKSEGGPSGRHWILDPIDGTKGFIRGDQYAVALGLLDEGKVVLGVLGCPNLPLKSTNKHNGSSSGDQVGSLFFATIGCGAEVEALEGSEPQKITICSISNPVDASFFESLEHSKRDLTSTIAEKLGVQAPPVRMDSQAKYGALAQGDGAIYLRFSQKGYIETVWDHAAGSIIVTEAGGMVKDASGNDLDFSKGRYLDRDRGIIATNRYLMPMVLKAVQEAIKEEQ
			SiSBPASE	METVAAASYAGRATSATRSPTCCAAMSFSQSYRPKASRPPTTFYGESVRVSTARPLSARQSKAASRAALNTRCEIGDSLEEFLTKATPDKNLIRLLTCMGEAMRTIAFKVRTASCGGTACVNSFGDEQLAVDMLANKLLFDALEYSHVCKYACSEEVPELQDMGGPVEGGFSVAFDPLDGSSIVDTNFTVGTIFGVWPGDKLTGVTGGDQVAAAMGIYGPRTTYVIALKDCPGTHEFLLLDEGKWQHVKDTTSIGEGKMFSPGNLRATFDNPDYDKLINYYVKEKYTLRYTGGMVPDVNQIIVKEKGIFTNVTSPSAKAKLRLLFEVAPLGFLMEKAGGHSSDGKQSVLDKVINELDERTQVAYGSKNEIIRFEETLYGSSRLTAGATVGAAA
			SiVTC4	MSEEQFLAVAEEAAKNAGEIIRKGFYQTKNVEHKGQVDLVTETDKACEDLIFNHLRKHFPDHKFIGEETSAALGATADLTDDPTWIVDPLDGTTNFVHGFPFVCVSIGLTIRKIPTLGVVYNPIMNELFTAVRGKGAFLNGSPIKASSQDELVKALLVTEAGTKRDKTTVDDTTNRINKLLYKIRSIRMCGSLALNMCGVACGRLDLCYEMGFGGPWDVAAGAVILQEAGGHVFDPSGGEFDLMSRRMAGSNGLLKDKFVKELGDTN
	Setaria viridis	12	SvCFBP1	MAAAAATSSHLLLLSRQQAASLRCRLSFLGQSRRPASRGAAPGASVRCMAAVDTAPAATEASSTKSSYEIVTLTTWLLKQEQAGVIDNEMTIVLASISTACKQIAALVQRAPISNLTGVQGAVNVQGEDQKKLDVVSNEVFSNCLKSSGRTGVIASEEEDVPVAVEESYSGNYIVVFDPLDGSSNIDAAVSTGSIFGIYAPNDECLADVENSGTLDSVEQRCVVSVCQPGSNLLAAGYCMYSSSVIFVLTLGAGVYVFTLDPMYGEFVLTQEKVQIPKAGKIYAFNEGNYALWDDKLKKYMDSLKEPGDSGKPYSARYIGSLVGDFHRTLLYGGIYGYPRDRKSKNGKLRLLYECAPMSFIVEQAGGKGSDGHQRILDITPTEIHQRVPLYIGSVEEVD…
			SvCYFBP	MDHEADAHRTDLMTITRHVLNEQSRYPESRGDFTILLSHIVLGCKFVASAVSKAGLAHLIGLAGETNVQGEEQKKLDVLSNEVFVKALVSSGRTCVLVSEEDEEATFVDPKLRGKYCVCFDPLDGSSNIDCGVSIGTIFGIYMIKDKDNVTLEDVLQPGKDMLAAGYCMYGSSCMLVLSTGSGINGFTLDPSLGEFILTHPDIKMPKKGKIYSVNEGNARNWDAPTAKFVEKCKYPTDGSSPRSLRYIGSMVADVHRTLLYGGVFLYPADEKNPNGKLRVLYEVFPMSFLMEQAGGQSFTGKERALDLVPTKIHERSPVFLGSYDDVEEIKALYAEQAKSSSA
			SvCYFBP1-1	MDHAAEAQRTDLMTITRHVLNEQSRHPESRGDFTILLSHIVLGCKFVASAVNKAGLAKLIGLAGETNVQGEEQKKLDVLSNEVFVKALVSSGRTCVLVSEENEEAIFVDPALRGKYCVCFDPLDGSSNIDCGVSIGTIFGIYMIKDKDNVTLDDVIQPGTNMLAAGYCMYGSSCTLVLSTGNGVNGFTLDPSLGEFILTHPNIKIPKKGKIYSVNEGNAKNWDAPTAKYVEKCKFPQDGSSPKSLRYIGSMVADVHRTLLYGGIFLYPADQKSPNGKLRVLYEVFPMSFLMEQAGGQAFTGKQRALELAPTKLHERSPIFLGSYDDVEEIKALYASESSTV
			SvFBP1	MPLSSSLSSFLVLRHHPPRSLPPTSNRPPLHLRLLLPPFARRRAFVCQPLAAAATDDMAAAAAAASPPTLLEHMGQAGAAADLTVLVAHIQSACKRIASLVASPGNAELSRAKAAGGGGVAADRDAPKPLDELSNDIILSSLKSSGKVAVLASEENDLPIWISDDGPYVVVTDPLDGSRNIEVSIPTGTIFGIYNRLVELDHLPLEERAQLNSLQSGTRLVAAGYVLYSSATILCISFGAGTHAFTLDWSTGEFILTHPSLQIPPRGQIYSVNDARYFDWPEGLRKYIDTIRQGKGQHPKKYSARYVCSLVADFHRTLIYGGVAMNPRDHLRLVYEANPLSFLAEQAGGRGSDGKNRILLIQPIKLHQRLPLFLGSMEDMLELESYGDVQQKVNPGYEV
			SvHL-1	MGSLRLTGWAAAASAQRGFPAAAAPEWGARRRHRCHGAPMARLRCAPSPAPAVASSLGVGAAGQLQVGAEREWLWDCRGDVGGGARDYAREMEVAVRVVQVACTLCQRVQDSLLRPGADAGGRVHSKLDRSPVTVADWGVQAIVSWLLSNSFQDENVSIVAEEDDETLSSCDGAALLESVVEAVNGCLIEAPKYGLRPPEKELRAHDVIQAIRKCSSTGGPKGRFWVLDPVDGTLGFVRGDQYAIALALIEDGEVILGVLGCPNYPMKKEWLNYHQKYYRLISKVAPPPLGSWHKGCVMYAQKGCGQAWMQPLVHDFGKLDWRHPREIQVSSISDPVSATFCEPVEKANSSHSFTAGLAQSVGLRNQPLRVYSMVKYAAIARGDAEIFMKFARAGYKEK…
			SvIMPL1	MARYLLAPTTTASSSSALLPKDAAKNLPPSRTLRLRALGSRSGKARPIMAVASEQAAPAAGYPKVAAPTTGPIPAAELLGVIEAAAKAGADVIMEAVNKPRNIHYKGVADLVTDTDKLSESVILEVVMKNFKNHLILGEEGGLIGDSLSEYLWCIDPLDGTTNFAHGYPSFSVSIGVLFRGKPAASTVVEFCGGPFCWSTRTISASAGGGAYCNGQKIHVSQTDKVEQSLLVTGFGYEHDDAWTTNINLFKEFTDISRGVRRLGSAAADMSHVGLGITEAYWEYRLKPWDMAAGVLIVEEAGGVVTRMDGGAFTVFDRSVLVSNGVVHGQLLDRIGPPTEDLKKKGIDFSLWFKPDKYPTDF
			SvIMPL2	MLSSSSTTLPPASPLPGPASANPNPRSRLLRLPAALSAPSAVVRARGRPPMGSVRASVAAGAGGPGAAAVGEVATEQLVEVAQRAADAAGEVLRKYFRQRVEIIDKEDNSPVTIADREAEEAMVSVILKSFPTHAIFGEENGWRCVENSADYVWVLDPIDGTKSFITGKPLFGTLIALLHNGKPVIGVIDQPILRERWIGVDGKQTTLNGQEISVRSCNSLAQVYLYTTSPHLFEGDAEDAFIRVRDKVKVPLYGCDCYAYALLASGFVDLVVESGLKPYDFLSLVPIIEGAGGSITDWRGGKLYWPVTADSRPTSFNVVAAGDARVHKQALDALQWR
			SvIMPL3	MPLLHLSLPPHRLLVAGRGRLCFPPAPRHTRLSVRAAAGDAAVSVAAETYGLPFPPERASHHHELAAAIAAVERACRLCVDVKRSLFSGGKSILEKNDQTPVTIADFGVQALVSLELQRLFPSIPLVAEEDSASLRSSEADDNSSDVLVESIFSAVADKVSNSGSPLTQDDVLRAIDRGGKDAVSFDSNPATYWVLDPIDGTKGFLRGDDALYVVGLALVVNGKVTVGVMGCPNWTNYTVANGKDDSAAACNGRGILMISHLGCGTWTRRLSADIGQFTTAPDIWKRCFVDTCSVVHMARYCIPDSQTWDMIPLSVLFNSTTGESDPRNENEILLLSVFCGSLCKYLTVASGRASVFVLRARTTTQIKSWDHAVGVICVQEAGGQISDWSGKPLDLAAD…
			SvSAL1	MAARAGLVLPHALLASSRALTSCRARARLPNPPPTFPTTYHRGASSSSASPPRLRSRSHRASPRVLPVRSMASGNPYAAELAAAKKAVTLAARLCKTVQQDIVHSGIQSKADKSPVTVADYGSQILVSLALTMEVSGPFSLVAEEDSEELRKDGAEEILEEITDLVNETIVDDGSYNISFSKEGILSAIDDGKSEGGSSGRHWVLDPIDGTKGFLRGDQYAIALALLDEGKIVLGVLACPNLPLSSISNPNGSSSGNQVGALFSATIGCGAEVESLDGSPPQKIGVCSIDNPVNASFFESYESAHSMHDLTSSIAEKLGVLAPPVRIDSQAKYGALARGDGAIYLRFPHKGYREKIWDHAAGSIVVTEAGGIVTDAAGNDLDFSQGRFLDLDTGIIATN…
			SvSAL2	MSQHPEAAANPYAAELAAAKKAVALASRLCRRVQQGILQSDIQSKADRTPVTVADYGSQVLVSLVLKKELPSHSFSMVAEEDSEDLRKDDAQEILEHITSLVNETIANDDSYNMSLSKEDVLAALDGGKSEGGPSGRHWILDPIDGTKGFIRGDQYAVALGLLDEGKVVLGVLGCPNLPLKSTNKHNGSSSGDQVGSLFFATIGCGAEVEALEGSEPQKITICSISNPVDASFFESLEHSKRDLTSTIGEKLGVQAPPVRMDSQAKYGALAQGDGAIYLRFSQKGYIETVWDHAAGSIIVTEAGGMVKDASGNDLDFSKGRYLDRDRGIIATNRYLMPMVLKAVQEAIKEEQ
			SvSBPASE	METVAAASYAGRATSATRSPTCCAAMSFSQSYRPKASRPPTTFYGESVRVSTARPLSARQSKAASRAALNTRCEIGDSLEEFLTKATPDKNLIRLLTCMGEAMRTIAFKVRTASCGGTACVNSFGDEQLAVDMLANKLLFDALEYSHVCKYACSEEVPELQDMGGPVEGGFSVAFDPLDGSSIVDTNFTVGTIFGVWPGDKLTGVTGGDQVAAAMGIYGPRTTYVIALKDCPGTHEFLLLDEGKWQHVKDTTSIGEGKMFSPGNLRATFDNPDYDKLINYYVKEKYTLRYTGGMVPDVNQIIVKEKGIFTNVTSPSAKAKLRLLFEVAPLGFLMEKAGGHSSDGKQSVLDKVINELDERTQVAYGSKNEIIRFEETLYGSSRLTAGATVGAAA
			SvVTC4	MSEEQFLAVAEEAAKNAGEIIRKGFYQTKNVEHKGQVDLVTETDKACEDLIFNHLRKHFPDHKFIGEETSAALGATADLTDDPTWIVDPLDGTTNFVHGFPFVCVSIGLTIRKIPTVGVVYNPIMNELFTAVRGKGAFLNGSPIKASSQDELVKALLVTEAGTKRDKTTVDDTTNRINKLLYKIRSIRMCGSLALNMCGVACGRLDLCYEMGFGGPWDVAAGAVILQEAGGHVFDPSGGEFDLMSRRMAGSNGLLKDKFVKELGDTN
	Aegilops tauschii	13	AetCYFBP	MDHAAEAQRTDLMTITRHALNEQGRHPESRGDFTILLSHIVLGCKFVASAVNKAGLAKLIGLAGETNVQGGQGEEQKKLDVLSNEVFVKALVSSGRTCVLVSEENEAAIFVDAPLRGKYCVCFDPLDGSSNIDCGVSIGTIFGIYMIKDKDNATLEDVLQPGTHMIAAGYCMYGSSCTLVLSTGNGVNGFTLDPSLGEFILTHPNIKIPNKGKIYSVNEGNARNWDAPTAKYVERCKFPQDGSSPKSLRYIGSMVADVHRTLLYGGIFLYPADKKSPNGKLRVLYEVFPMSFLMEQAGGQSFTGKHRALEIVPSEIHQRSPIFLGSYDDVEEIKSLYAAESSTA
			AetCYFBP1-1	MDHAAEAQRTDLMTITRHALNEQGRHPESRGDFTILLSHIVLGCKFVASAVNKAGLAKLIGLAKLIGLAGETNVQLDVLSNEVFVKALVSSGRTCVLVSEENEAAIFVDAPLRGKYCVCFDPLDGSSNIDYGVSIGTIFGIYMIKDKDNATLEDVLQPGTDMIAAGYCMYGSSCTLVLSTGNGVNGFTLDPSRGEFILTHPNIKIPNKGKIYSVNEGNARNWDAPTAKYAERCKFPQDGSSPKSLRYIGSMVADVHRTLLYGGIFLYPADKKSPSGKVRVLYEDFPMSFLMEQAGGQSFTGKQRALEIVPSEIHQRSPIFLGSYDDVEEIKSLYASESSTA
			AetCYFBP1-2	MDHAADTFRTDLMTITRHVLNEQSRHPESRGDLTILLSHIVLGCKFVASAVNKAGLAKLTGLAGETNVQVPQGEEQKKLDVLSNEVFVNALVSSGRTCVLVSEEDEKATFVDPKLRGKYCVCFDPLDGSSNIDCGVSIGTIFGIYMIKNQDTVTLEEVLQPGKDMIAAGYCMYGSSCTLVLSTGNGVNGFTLDPSLGEFIMTHPDIKIPPKGKIYSVNEGNAKNWDTPTAKYVEKCKYPTDGSSPKSLRYIGSMVADVHRTLLYGGIFLYPADKKSPSGKLRVMYEVFPMSFLMEEAGGQSFTGKGRSLDLIPTDIHERSPIFLGSSDDVEEIKALYAEEAKKAGSA
			AetFBP1	MTLSPHTLRPPLPLSLPLPPTSNRRPPPRPLHPALARRRRSVLLPKPPRAGAGAGDGMATHGAHPTLLEHMGRAGAPADLAVLVAHIQAACKRIAALVASPGNADLSRAKPAAAGAASAAGRDAPKPLDELSNEIILSSLQSSGKVAVVASEENDLPVWMCDDGPYVVVTDPLDGSRNIEVSIPTGTIFGIYDRLVELDQLPVEEKAQLNSLQSGSRLVAAGYVLYSSATIFCISFGAGTHGFTLDRSTGEFVLTHPSMQIPPRGQIYSVNDARYFDWPEGLKKYIDTIRQGKGQHPKKYSARYVCSLVADFHRTIIYGGVAMNPRDHLRLVYEANPLSFLAEQAGGRGSDGKTRILSIQPVKLHQRLPLFLGSMEDMLELESYGDVQQKVNPGYDV
			AetHL	MGGLRLSAWAAAPSPSPSPSSAAARGFPRSPPDWRGSERGRRSRCAPSSPPSASPALSLGAAGRLRVGADREWLWDCRGGGLGGGGGKKDYAKEMEAAVRVVQVACTLCQRVQDALLLADPGSGSGGVHSKLDRSPVTVADWGVQATVSWLLSDRFGDESVSIVAEEDDETLSSSDGTALLESVVAAVNGCLVEAPKYGLRSPEKDLGAHDVLQAIRKCSSTGGPKGRFWVLDPVDGTLGFVRGDQYAIALALIEDGEVVLGVLGCPNYPMKKEWLNYHQRYYRLMSKVAPPTSGTWNKGCVMYAHKGCGQAWMQPLVHDFGMLSWHNSREVQVSSVSDPVSATFCEPVEKANSSHSFTAGLAHSVGLRNQPLRVYSMVKYAAIARGDAEIFMKFARGG…
			AetIMPL1	EKKKQVVYRIAYTHRRSAAGGVKPFLSAPMARYLLPSTTTAASSFPRNARASPAPILAPRALASRSKHARAIMAVASDQPAAPSKYPKMAAPTTGPVPADELLGVIQAAAKAGAEVVMEAVNKPRNIQYKGVADLVTDTDKLSESVILEVVTKNFKDHLILGEEGGLIGDSLSEYLWCIDPLDGTTNFAHGYPSFSVSIGVLFRGKPAAATVVEFCGGPMCWNTRTISASSGKGAYCNGQKIHVSPTEKVEQSLLVTGFGYEHDDAWLTNINLFKEFTDVSRGVRRLGSAAADMSHVGLGITEAYWEYRLKPWDMAAGVLIVEEAGGVVTRMDGGEFTVFDRSVLVSNGTVHDQLLERIQPATEDLKKKGIDFSMWFKPDNYPTDF
			AetIMPL2	EFCDTAGGYRRPAVDVHVVRKKDCHHSSHQPKRTFPEAAARRRRGQNPPNPARRGGRHPPPLPLRAATPFKPRRLPPLFSSQMLPPISTIPPTFPLPHPAFTKPSLPYHLRSPSLLATFSSSAAGRACGIAGRWMGSVRASPSEAGGWAVAAAGKEGVDMERLVAVAQSAADAAGEVLRKYFRQRFEIIDKEDHSPVTIADREAEEAMTSVILKSFPTHAVFGEENGWRCAEKSADYVWVLDPIDGTKSFITGKPLFGTLIALLHNGKPVMGIIDQPILRERWVGVDGKKTTLNGQEISVRPCNVLEQAYLYTTSPHLFEGDAEDAFIRVRDKVKVPLYGCDCYAYALLASGFVDLVVESGLKPYDFLSLVPVIEGAGGSITDWEGNKLHWPVSSESRP…
			AetIMPL3	MPLLHLSLPAHRLLVGRRRLFAPLTPPPSRISIRSAAEDGCDLPFPPERAPHHRELAAAAASVERACRLCVDVKRSLLSGGRKILEKNDQSPVTIADFGVQALISFELQQLFPSIPLVAEEDSTFLKSSNPDDNSGNVLIESISSAVADKVKNSGSPLTHDDVLRAIDRGGKDAVSFDSNPATYWVLDPIDGTKGFLKGDDALYVVGLALVVNGKVAVGVMGCPNWTNGTTANKKEENLDPCPGNGILMVSHVCCGTWSRHLSPEIGQFTTAQDVWKRCFVDACSVVHMARFCIPDSQTWNMIPLSVLFDSTTDESDTRDENKILLRYACCGSLCKYIMVASGRASVFFSRARVNTQIKAWDHAVGMICVQEAGGQISDWSGEPLDLAADLTGRRILYP…
			AetIMPL3-1	MPLLHPSLPPHRLLVVRQCRLIAPPVHPLSRLSVRSAAAAASVAHEVCALPFPPDRASHHRELAAAVASVERACRLCVDVRASMLVGDEKILEKNDQTHVTIADFGVQALISFELHQLFPSIPLVAEEDSAFIRSSNAADSKSNTLVESISSFFTKHVNNNGPPLTHDDVLRAIDRGGKDAVSFDSNPATYWLLDPIDGTKGFLKGEDSLYVVGLALVVDGKLAVGVMGCPNLTDTTVGDTEDESIAACPGHGILMVSHVGCGTWTRPMSADQLTTAPDIWKRCSVDPCSVAHMARFCIVDSHTWDMMPLSAHFSSTMDESEPRDENKILLQNSCGGSLSKYLLVACGRMSVFILLARAEKLLKAWDHAVGVICVEEAGGQTCDWSGKPLDFGADLTGR…
			AetSAL1	MASRVGLLLAPSSSLARNPPRARLPYPLPSHHLGRPTYRRFASSAPLRSPLWWPRQAPPLFSARAMSGSAGSPPYAAELAAAKKAVALAARLCQTVQQEILQSDIQSKADKSPVTVADYGSQVLVSLALNMEVTSGSFSMVAEEDSEDLRKDSAEEILEHITDLVNETLAEDGSYNITLSKEGILSAIDTGKSEGGPSGRHWVLDPIDGTKGFLRGGQYAIALALLDEGKVVLGVLGCPNLPLASISNLNGSSSGDQMGALFSATVGCGAEVESLEGSPPQKISVCTIDNPVNASFFESYEGAHTMHDLTGSIAEKLGVQAPPVRIDSQAKYGALARGDGAIYLRFPHKGYKEKIWDHAAGAIVVTEAGGVVTDASGNDLDFSKGRFLDVDTGIIATNK…
			AetSAL1-1	MSRPAGNPSYAAELGAAKKAVALAARLCQTVQQEIVQSDIQSKADKTPVTVADYGSQVLVSLVLNMEVTSGSFSMVAEEDSEDLRKDGAEEILERITDLVNKTLAEDGSYNILLSKEAILSAIDTGKSEGGPSGRHWVLDPIDGTKGFVRGGQYAIALALLDEGRVVLGVLGCPNLPFTSVSNLSGSSSGDQTGALFSAAIGCGAEVQSLDGSPPQKISVCTIDNPANASFFESYEGAHSMRDFTGSVAEKLGVQAPPVRIDSQAKYGALARGDGAIYWRFPHEGYRETIWDHAAGSIVVTEAGGVVKDASGNDLDFSKGRYLDRDTGIIATNKQLMPSVLKSVQEAIKEKKQASSPL
			AetSBPASE	METVAAAGYARGAATRSPACCAAMSFSQSYRPKAARPATTFYGESLRANTARTSFPAGRQSKAASRAALTTRCAIGDSLEEFLTKATPDKNLIRLLICMGEAMRTIAFKVRTASCGGTACVNSFGDEQLAVDMLADKLLFEALEYSHVCKYACSEEVPELQDMGGPVEGGFSVAFDPLDGSSIVDTNFTVGTIFGVWPGDKLTGVTGGDQVAAAMGIYGPRTTFVVALKDCPGTHEFLLLDEGKWQHVKDTTTIGEGKMFSPGNLRATFDNPDYDKLVNYYVKEKYTLRYTGGMVPDVNQIIVKEKGIFTNVTSPTAKAKLRLLFEVAPLGFLIEKAGGHSSDGKQSVLDKVISQLDERTQVAYGSKNEIIRFEETLYGSSRLAASATVGATA
			AetVTC4	MAEEQFLAAAVGAAKSAGEIIRKSFYLTKNVEHKGQVDLVTETDKACEDLIFNHLRMLYPDHKFIGEETSAALGSTDDLTYDPTWIVDPLDGTTNFVHGFPFVCVSIGLTIGKIPTVAVVYNPIMNELFTAVRGKGAFLNGSPIKTSPQNELVKALMVTEVGTKRDKSTLDDTTNRINKLLFKIRSIRMCGSLALNMCGVACGRLDLCYEIGFGGPWDVAAGALILKEAGGFVFDPSGDEFDLMAQRMAGSNGHLKDQFIKALGDAS
	Triticum dicoccoides	24	TdCFBP1-4A	THSPPALSQATQTAARNQWNKTRSRHHHHGARQDKAGERNSSIRSTKAMAAATTTTSRPLLLSRQQAAASSLQCRLPRRPGSSLFAGQGQASTPNVRCMAVVDTASAPAPAAARKRSSYDMITLTTWLLKQEQEGVIDNEMTIVLSSISTACKQIASLVQRAPISNLTGVQGATNVQGEDQKKLDVISNEVFSNCLRWSGRTGVIASEEEDVPVAVEESYSGNYIVVFDPLDGSSNIDAAVSTGSIFGIYSPSDECHIGDDATLDEVTQMCIVNVCQPGSNLLAAGYCMYSSSVIFVLTIGTGVYVFTLDPMYGEFVLTQEKVQIPKSGKIYSFNEGNYALWDDKLKKYMDSLKEPGTSGKPYSARYIGSLVGDFHRTMLYGGIYGYPSDQKSKNGKLR…
			TdCFBP1-4B	AARNQWNKTRSRHHHHGARQDKAGERNSSIRSTKAMAAATTTTSRPLLLSRQQAAASSLQCRLPRRPGSSLFAGQGQASTPNVRCMAVVDTASAPAPAAARKRSSYDMITLTTWLLKQEQEGVIDNEMTIVLSSISTACKQIASLVQRAPISNLTGVQGATNVQGEDQKKLDVISNEVFSNCLRWSGRTGVIASEEEDVPVAVEESYSGNYIVVFDPLDGSSNIDAAVSTGSIFGIYSPSDECHIDDDATLDEVTQMCIVNVCQPGSNLLAAGYCMYSSSVIFVLTIGTGVYVFTLDPMYGEFVLTQEKVQIPKSGKIYSFNEGNYALWDDKLKKYMDSLKEPGTSGKPYSARYIGSLVGDFHRTMLYGGIYGYPSDQKSKNGKLRLLYECAPMSFIAE…
			TdCYFBP-1A	SFPDTSGRAAVPSISTLRYTDVEARTAQHPARLPPASFRLFQSPRRAPDAASHIPLPSLTTIRGRCNLFVSVARPRRPRRASLAPLLGKMDHAADAQRTDLMTITRHALNEQGRHPESRGDFTILLSHIVLGCKFVASAVNKAGLAKLIGLAGETNVQGEEQKKLDVLSNEVFVKALVSSGRTCVLVSEENEAAIFVDAPLRGKYCVCFDPLDGSSNIDCGVSIGTIFGIYMIKDKDNATLEDVLQPGTNMIAAGYCMYGSSCTLVLSTGNGVNGFTLDPSLGEFILTHPNIKIPNKGKIYSVNEGNARNWDAPTAKYVERCKFPQDGSSPKSLRYIGSMVADVHRTLLYGGIFLYPADKKSPNGKLRVLYEVFPMSFLMEQAGGQSFTGKQRALEIVP…
			TdCYFBP-1B	MDHAAEAQRTDLMTITRHALNEQGRHPESRGDFTILLSHIVLGCKFVASAVNKAGLAKLIGLAGETNVQGEEQKKLDVLSNEVFVKALVSSGRTCVLVSEENEAAIFVDAPLRGKYCVCFDPLDGSSNIDCGVSIGTIFGIYMIKDKDNATLEDVLQPGTDMIAAGYCMYGSSCTLVLSTGNGVNGFTLDPSLGEFILTHPNIKIPNKGKIYSVNEGNARNWDAPTANQHCRYVERCKFPQDGSSPKSLRYIGSMVADVHRTLLYGGIFLYPADKKSPNGKLRVLYEVFPMSFLMEQAGGQSFTGKQRALEIVPAEIHQRSPIFLGSYDDVEEIKSLYASESSTA
			TdCYFBP-3A	MDHAADTFRTDLMTITRHVLNEQSRHPESRGDLTILLSHIVLGCKFVASAVNKAGLAKLTGLAGETNVQALQGEEQKKLDVLSNEVFVNALVSSGRTCVLVSEEDEKATFVDPKLRGKYCVCFDPLDGSSNIDCGVSIGTIFGIYMIKNQDTVTLEEVLQPGKDMIAAGYCMYGSSCTLVLSTGNGVNGFTLDPSLGEFIMTHPDIKIPPKGKIYSVNEGNAKNWDTPTAKYVEKCKYPTDGSSPKSLRYIGSMVADVHRTLLYGGIFLYPADKKSPSGKLRVMYEVFPMSFLMEEAGGQSFTGKGRSLDLIPTDIHERSPIFLGSSDDVEEIKALYAEEAKKAGSA
			TdCYFBP-3B	MDHAADTFRTDLMTITRHVLNEQSRHPESRGDLTILLSHIVLGCKFVASAVNKAGLAKLTGLAGETNVQGEEQKKLDVLSNEVFVNALVSSGRTCVLVSEEDEKATFVDPKLRGKYCVCFDPLDGSSNIDCGVSIGTIFGIYMIKNQDTVTLEEVLQPGKDMIAAGYCMYGSSCTLVLSTGNGVNGFTLDPSLGEFIMTHPDIKIPPKGKIYSVNEGNAKNWDTPTAKYVEKCKYPTDGSSPKSLRYIGSMVADVHRTLLYGGIFLYPADKKSPSGKLRVMYEVFPMSFLMEEAGGQSFTGKGRSLDLIPTDIHERSPIFLGSSDDVEEIKALYAEEAKKEGSA
			TdFBP1-7A	IEHHPPPPVASQAMTLSPHTLRPPLPLPLPLPPTSNRRHHRPPPPPSRSRPRAVRRSELLAGDGMASHGSHPTLLEHMGRTGAPADLAVLVAHIQAACKRIAALVASPGNADLSRAKPAAAGAASAAGRDAPKPLDELSNEIILSSLQSSGKVAVVASEENDLPVWLCDDGPYVVVTDPLDGSRNIEVSIPTGTIFGIYDRLVELDQLPVEEKAQLNSLQSGSRLVAAGYVLYSSATIFCISFGAGTHGFTLDRSTGEFVLTHPSMQIPPRGQIYSVNDARYFDWPEGLKKYIDTIRQGKGQHPKKYSARYVCSLVADFHRTIIYGGVAMNPRDHLRLV
			TdFBP1-7B	MTLSPRTLRPPLPLPLPPTSNRRPPPRPSRPRLPALARRRSSSVLLARPPRAGAGAGDGGMASHPTLLEHMGRAGAPADLAVLVAHIQAACKRIAALVASPGNADLSRAKPAAAGGASAAAGRDAPKPLDELSNEIILSSLQSSGKVAVVASEENDLPVWMCDDGPYVVVTDPLDGSRNIEVSIPTGTIFGIYDRLVELDQLPVEEKAQLNSLQSGSRLVAAGYVLYSSATIFCISFGAGTHGFTLDRSTGEFVLTHPSMQIPPRGQIYSVNDARYFDWPEGLKKYIDTIRQGKGQHPKKYSARYVCSLVADFHRTIIYGGVAMNPRDHLRLVYEANPLSFLAEQAGGRGSDGKTRILSIQPVKLHQRLPLFLGSMEDMLELESYGDVQQKVNPGYDV
			TdHL-6A	KDYAKEMEAAVRVVQVACTLCQRVQDSLLLADPGSGSAGVHSKLDRSPVTVADWGVQATVSWLLSDCFGDESVSIVAEEDDKTLSSSDGTALLESVVSAVNGCLVEAPKYGLRSPEKDLGAHDVLQAIRKCSSTGGPKGRFWVLDPVDGTLGFVRGDQYAIALALIEDGEVVLGVLGCPNYPMKKEWLNYHQRYYRLMSKVAPPTSGSWNKGCVMYAHKGCGQAWMQPLVHDFGMLSWHNSREVQVSSVSDPVSATFCEPVEKANSSHSFTAGLAHSVGLRNQPLRVYSMVKYAAIARGDAEIFMKFARAGYKEKIWDHAAGVVIIQEAGGVVTDAGGCPLDFSRGVYLEGLDRGIIACSGALLHQRILQAVDASWNSSTL
			TdHL-6B	AVRVVQVACTLCQRVQDSLLLADPGSGSGGVHSKLDRSPVTVADWGVQATVSWLLSDCFGDENVSIVAEEDDKTLSSSDGTALLESVVAAVNGCLVEAPKYGLRSPEKDLGPHDVLQAIRKCSSTGGPKGRFWVLDPVDGTLGFVRGDQYAIALALIEDGEVVLGVLGCPNYPMKKEWLNYHQRYYRLMSKVAPPTSGSWNKGCVMYAHKGCGQAWMQPLVHDFGMLSWHNSREVQVSSVSDPVSATFCEPVEKANSSHSFTAGLAHSVGLRNQPLRVYSMVKYAAIARGDAEIFMKFARAGYKEKIWDHAAGVVIIQEAGGVVTDAGGCPLDFSRGVYLEGLDRGIIACSGALLHRRILQAVDASWNSSTL
			TdIMPL1-6A	MARYLLPSSTTAASSLPRNARASPAPILALRALASRSKHARSLMAVASDQPAAPSKYPKMAAPTTGPVPADELLGVIKAAAKAGAEVVMEAVNKPRNIQYKGVADLVTDTDKLSESVILEVVTKNFKDHLILGEEGGLIGDSLSEYLWCIDPLDGTTNFAHGYPSFSVSIGVLFRGKPAAATVVEFCGGPMCWNTRTISASSGKGAYCNGQKIHVSPTEKVEQSLLVTGFGYEHDDAWLTNINLFKEFTDVSRGVRRLGSAAADMSHVGLGITEAYWEYRLKPWDMAAGVLIVEEAGGVVTRMDGGEFTVFDRSVLVSNGTVHDQVSF
			TdIMPL1-6B	GGKQQGGIKPFLSAPMARYLLPSTTTAASSLPRNARASPAPILALRSLASRSKHARAIMAVASSQPAAPSKYPKMAAPTTGPVPADELLGVIQAAAKAGAEVVMEAVNKPRNIQYKGVADLVKDTDKLSESVILEVVTKNFKDHLILGEEGGLIGDSLSEYLWCIDPLDGTTNFAHGYPSFSVSIGVLFRGKPAAATVVEFCGGPMCWNTRTISASSGKGAYCNGQKIHVSPTEKVEQSLLVTGFGYEHDDAWLTNINLFKEFTDVSRGVRRLGSAAADMSHVGLGITEAYWEYRLKPWDMAAGVLIVEEAGGVVTRMDGGEFTVFDRSVLVSNGTVHDQLLERIRPATEDLKKKGIDFSMWFKPENYPTDF
			TdIMPL2-3A	QNPPNPARRGGRHPPPLPLRAATPFKPRRLPPLFSSQMLPPICTIPLTFPLPNPAFTKPSLRHHLRSPSLLATFSSAAAGRACGIAGRWMGSVRASPSEAGGWAVAAAGKEGVEMERLVAVAQSAADAAGEVLRKYFRQRFEIIDKEDHSPVTIADREAEEAMTSVILKSFPTHAVFGEENGWRCAEKSADYVWVLDPIDGTKSFITGKPLFGTLIALLHNGKPVMGIIDQPILRERWVGLDGKKTTLNGQEISVRPCNVLAQAYLYTTSPHLFEGDAEDAFIRVRDKVKVPLYGCDCYAYALLASGFVDLVVESGLKPYDFLSLVPVIEGAGGSITDWEGNKLHWPVSSESQPTSFNVVAAGDSRVHGQALAALRWR
			TdIMPL2-3B	KYFRQRFEIIDKEDHSPVTIADREAEQAMTSVILNSFPTHAVFGEENGWRCAEKSADYVWVLDPIDGTKSFITGKPLFGTLIALLHNGKPIMGVIDQPILRERWVGVDGKKTTLNGQEISVRPCNVLEQAYLYTTSPHLFEGDAEDAFIRVRDKVKVPLYGCDCYAYALLASGFVDLVVESGLKPYDFLSLVPVIEGAGGSITDWEGNKLHWLVSPESRPTSFNVVAAGDSRVHGQALAALRWR
			TdIMPL3-2A	AAPPPLASAAPSPRRPPATIRPADASSLSYLDKVSLRAAALISSAAEDGSDLPFPPERAPHHRELAAAAASVERACRLCVDVKRSLLSGGRKILEKNDQSPVTIADFGVQALISFELQQLFPSIPLVAEEDSTFLKSSNPDDNSGNVLIESISSAVTDKVKNSGSPLTHDDVLRAIDRGGKDAVSFDSNPATYWVLDPIDGTKGFLKGDDALYVVGLALVVNGKVAVGVMGCPNWTTANKKEENLDPCPGNGILMVSHVGCGTWSRHLSPEIGQLTTAQDVWKRCFVDACSVVHMARFCIPDSQTWNMIPLSLLFDSTTDESDTRDENKILLRYACCGSLCKYIMVASGRASVFFSRARVNTQIKAWDHAVGMICVQEAGGQISDWSGKPLDLAADLTG…
			TdIMPL3-6A	MPLLHPSLPPHRLLVVRQCRLIAPPVHPPSRLSAHPLLFLHRAAAAAPVAHEVCALPFPPDRASHHRELAAAVASVERACRLCVDVRASMLVGDEKILEKNDQTHVTIADFGVQALISFELQQLFPSIPLVAEEDSAFIRSSNTADSKSNTLVESISSFFTKHVNNNGPPLTHDDVLRAIDRGGKDAVSFDSNPATYWLLDPIDGTKGFLKGEDSLYVVGLALVVDGKLAVGVMGCPNLTETTVGDTEDESIAACPGHGILMVSHVGCGTWSRPMSAEIGQLTTAPDVWKRCSVDPCSVAQMARFCIVDSHTWDMMPLSAHFSSTMDESEPRDENKILLQNSCGGSLSKYLLVACGRMSVFILLARAEKLLKAWDHAVGVICVEEAGGQTCDWSGKPLD…
			TdIMPL3-6B	MPLLHLSLPPHRLLVVRQCRLIAPPLHPPSRLSVRSAAAAAPVAHEVCALPFPPDRTSHHRELAAAVASVERACRLCVDVRASMLVGDEKILEKNDQTHVTIADFGVQALISFELQQLFPSIPLVAEEDSAFIRSSSATDSNSNTLVESISSFVSKEVSNNGPPLTHDDVLRAIDRGGKDVVSFDSNPATYWLLDPIDGTKGFLKGEDSLYVVGLALVVDGKLALGVMGCPNLTDTTVGDTEDESIAAYPGHGILMVSHVGCGTWSRPMSAEIGQLTTAADVWKRCYVDPCSVAHMARFCIVDSHTWDMMPLSAHFSSTMDESEPRDENKILLQNSCGGSLSKYLLVACGRMSVFILLARAEKLLKAWDHAVGVICVEEAGGQTCDWSGKPLDFGADLT…
			TdSAL1-4A	MSRPAGNRPYAAELGAAKKAVALAALLLQTVQREIVQSDIQSKADKTPVTVADYGSQVLVSLVLNKEITSGSFSMVAEEDSEDLRKDGAEEILERITDLVNKTLAEDGSYNFSLSKEAILSAIDTGKSEGGPSGRHWVLDPIDGTKGFVRGGQYAIALALLDEGRVVLGVLGCPNLPFTSTSNLSGSSSGDQTGALFSAAIGCGAEVQSLDGSPPQKISVCTIDNPANASFFESYEGAHTMRDFTGSVAEKLGVQAPPVRIDSQAKYGALARGDGAIYWRFPHEGYRETIWDHAAGSIVVTEAGGVVKDASGNDLDFSKGRFLDRDTGIIATNKQLMPSVLKSVQEAIKEKKLASSPL
			TdSAL1-5A	LGRPTYRRFASSAPLRSSLWWPRQAPPLFAARAMSGSAGSPPYAAELAAAKKAVALAARLCQTVQQEILQSDIQSKADKSPVTVADYGSQVLVSLALNMEVTSGSFSMVAEEDSEDLRKDNAEEILEHITDLVNETLAENGSYNITLSKEGILSAIDTGKSEGGPSGRHWVLDPIDGTKGFLRGGQYAIALALLDEGKVVLGVLGCPNLPLTSISNLNGSSSGDQTGALFSATIGCGAEVESLEGSPPQKISVCTIDNPVNASFFESYEGAHTMHDLTGSIAEKLGVQAPPVRIDSQAKYGALACGVGAIYLRFPHKGYKEKIWDHAAGAIVVTEAGGVVTDASGNDLDFSKGRFLDVDTGIIATNKQLMPSLLKSVQEAIKEKSQAPSPL
			TdSAL1-7A	MSRPAGNPSYAAELGAAKKAVALAARLCQTVQQEIVQSDIQSKADKTPVTVADYGSQVLVSVVLNMEVTSGSFSMVAEEDSEDLRKDGAEEILERITDLVNKTLAEDGSYNLLLSKEAILSAIDTGKSEGGPSGRHWVLDPIDGTKGFVRGGQYAIALALLDEGRVVLGVLGCPNLPFTSVSNLSGSSSGNQTGALFSAAIGCGAEVQSLDGSPPQKISVCTIDNPANASFFESYEGAHSMRDFTGCVAEKLGVQAPPVRIDSQAKYGALARGDGAIYWRFPHEGYRETIWDHAAGSIVVTEAGGVVKDASGNDLDFSKGRYLDRDTGIIATNKQLMPSVLKSVQEAIKEKKQASSPL
			TdSBPASE-3A	METVAAAGYAHGAATRSPACCAAMSFSQSYRPKAARPATSFYGESLRANTARTSFPAGRQSKAASRAALTTRCAIGDSLEEFLTKATPDKNLIRLLICMGEAMRTIAFKVRTASCGGTACVNSFGDEQLAVDMLADKLLFEALEYSHVCKYACSEEVPELQDMGGPVEGGFSVAFDPLDGSSIVDTNFTVGTIFGVWPGDKLTGVTGGDQVAAAMGIYGPRTTFVVALKDCPGTHEFLLLDEGKWQHVKDTTSIGEGKMFSPGNLRATFDNPDYDKLVNYYVKEKYTLRYTGGMVPDVNQIIVKEKGIFTNVTSPTAKAKLRLLFEVAPLGFLIEKAGGHSSDGKQSVLDKVISVLDERTQVAYGSKNEIIRFEETLYGSSRLAASATVGATA
			TdSBPASE-3B	METVAAAGYARGAATRSPACCAAMSFSQSYRPKAARPATSFYGESLRANTARTSFPAGRQSKAASRAALTTRCAIGDSLEEFLTKATPDKNLIRLLICMGEAMRTIAFKVRTASCGGTACVNSFGDEQLAVDMLADKLLFEALEYSHVCKYACSEEVPELQDMGGPVEGGFSVAFDPLDGSSIVDTNFTVGTIFGVWPGDKLTGVTGGDQVAAAMGIYGPRTTFVVALKDCPGTHEFLLLDEGKWQHVKDTTTIGEGKMFSPGNLRATFDNPDYDKLVNYYVKEKYTLRYTGGMVPDVNQIIVKEKGIFTNVTSPTAKAKLRLLFEVAPLGFLIEKAGGHSSDGKQSVLDKVISVLDERTQVAYGSKNEIIRFEETLYGSSRLAASATVGATA
			TdVTC4-4A	MAEEQFLAAAVDAAKSAGEIIRKSFYLTKNVEHKGQMDLVTETDKACEDLIFNHLRMLYPDHKFIGEETSAALGSTDDLTYDPTWIVDPLDGTTNFVHGFPFVCVSIGLTIGKIPTVGVVYNPIMNELFAAVRGKGAFLNGSPIKTSPQNELVKALMVTEVGTKRDKPTLDDTTNRINKLLFKIRSIRMCGSLALNMCGVACGRLDLCYEIGFGGPWDVAAGALILKEAGGFVFDPSGDAFDLMAQRMAGSNGHLKDQFIKALVDAS
			TdVTC4-4B	WIRDFLFAHSGTDLYPMQIIRKSFYLSKKVEHKGQVFPLASVDLVTETDKACEDLIFNHLRMLYPDHKFIGEETSAALGSTDDLTYDPTWIVDPLDGTTNFVHGFPFVCVSIGLTIGKIPTVGVVYNPIMNELFTAVRGKGAFLNGSPIKTSPQNELVKALMVTEVGTKRDKSTLDDTTNRINKLLFKIRSIRMCGSLALNMCGVACGRLDLCYEIGFGGPWDVAAGALILKEAGGFVFDPSGDEFDLMAQRMAGSNGHLKDQFIKALGDAS
	Triticum urartu	12	TuCFBP1	MAAATTTTSRPLLLSRQQAAASSLQCRLPRRPGSSLFAGQGQASTPNVRCMAVVDTASAPAPAAARKRSSYDMITLTTWLLKQEQEGVIDNEMTIVLSSISTACKQIASLVQRAPISNLTGVQGATNVQGEDQKKLDVISNEVFSNCLRWSGRTGVIASEEEDVPVAVEESYSGNYIVVFDPLDGSSNIDAAVSTGSIFGIYSPSDECHIGDDATLDEVTQMCIVNVCQPGSNLLAAGYCMYSSSVIFVLTIGTGVYVFTLDPMYGEFVLTQEKVQIPKSGKIYSFNEGNYALWDDKLKKYMDSLKEPGTSGKPYSARYIGSLVGDFHRTMLYGGIYGYPSDQKSKNGKLRLLYECAPMSFIAEQAGGKGSDGHQRVLDIMPTAVHQRVPLYVGSVEEV…
			TuCYFBP	MDHAADTFRTDLMTITRHVLNEQSRHPESRGDLTILLSHIVLGCKFVASAVNKAGLAKLTGLAGETNVQGEEQKKLDVLSNEVFVNALVSSGRTCVLVSEEDEKATFVDPKLRGKYCVCFDPLDGSSNIDCGVSIGTIFGIYMIKNQDTVTLEEVLQPGKDMIAAGYCMYGSSCTLVLSTGNGVNGFTLDPSLGEFIMTHPDIKIPPKGKIYSVNEGNAKNWDTPTAKYVEKCKYPTDGSSPKSLRYIGSMVADVHRTLLYGGIFLYPADKKSPSGKLRVMYEVFPMSFLMEEAGGQSFTGKGRSLDLIPTDIHERSPIFLGSSDDVEEIKALYAEEAKKAGSA
			TuCYFBP1-1	MDHAADAQRTDLMTITRHALNEQGRHPESRGDFTILLSHIVLGCKFVASAVNKAGLAKLIGLAGETNVQGEEQKKLDVLSNEVFVKALVSSGRTCVLVSEENEAAIFVDAPLRGKYCVCFDPLDGSSNIDCGVSIGTIFGIYMIKDKDNATLEDVLQPGTNMIAAGYCMYGSSCTLVLSTGNGVNGFTLDPSLGEFILTHPNIKIPNKGKIYSVNEGNARNWDAPTAKYVERCKFPQDGSSPKSLRYIGSMVADVHRTLLYGGIFLYPADKKSPNGKLRVLYEVFPMSFLMEQAGGQSFTGKQRALEIVPYEIHQRSPIFLGSYDDVEEIKSLYASESSTA
			TuFBP1	MTLSPHTLRPPLLLPLPLPPTSNRRPPPPASRPRPLHPALARRSRSSVLLARPPRAGAGAGDGGMASHGSHPTLLEHMGRAGAPADLAVLVAHIQAACKRIAALVASPGNADLSRAKPAAGGTAASAAGRDAPKPLDELSNEIILSSLQSSGKVAVVASEENDLPVWMCDDGPYVVVTDPLDGSRNIEVSIPTGTIFGIYDRLVELDQLPLEEKAQLNSLQSGSRLVAAGYILYSSATIFCISFGEGTHGFTLDRSTGEFVLTHPSMQIPPRGQIYSVNDARYFDWPEGLKKYIDTIRQGKGQHPKKYSARYVCSLVADFHRTIIYGGVAMNPRDHLRLVYEANPLSFLAEQAGGRGSDGKTRILSIQPVKLHQRLPLFLGSMEDMLELESYGDVQQKV…
			TuHL	MGGLRLSAWAAAPSPSPSSAAARGFPRSPPDWRGSGRGRRSRCAPSSPPSASPALSLGAAGRLRVGADREWLWDCRGGGLGGGGGKKDYAKEMEAAVRVVQVACTLCQRVQDSLLLADPGSGSAGVHSKLDRSPVTVADWGVQATVSWLLSDCFGDESVSIVAEEDDKTLSSSDGTALLESVVSAVNGCLVEAPKYGLRSPEKDLGAHDVLQAIRKCSSTGGPKGRFWVLDPVDGTLGFVRGDQYAIALALIEDGEVVLGVLGCPNYPMKKEWLNYHQRYYRLMSKVAPPTSGSWNKGCVMYAHKGCGQAWMQPLVHDFGMLSWHNSREVQVSSVSDPVSATFCEPVEKANSSHSFTAGLAHSVGLRNQPLRVYSMVKYAAIARGDAEIFMKFARAGYK…
			TuIMPL1	MARYLLPSSSTTAASSLPRNARASPAPILALRALASRSKHARSLMAVASDQPAAPSKYPKMAAPTTGPVPADELLGVIQAAAKAGAEVVMEAVNKPRNIQYKGVADLVTDTDKLSESVILEVVTKNFKDHLILGEEGGLIGDSLSEYLWCIDPLDGTTNFAHGYPSFSVSIGVLFRGKPAAATVVEFCGGPMCWNTRTISASSGKGAYCNGQKIHVSPTEKVEQSLLVTGFGYEHDDAWLTNINLFKEFTDVSRGVRRLGSAAADMSHVGLGITEAYWEYRLKPWDMAAGVLIVEEAGGVVTRMDGGEFTVFDRSVLVSNGTVHDQLLERIRPATEDLKKKGIDFSRWFKPDNYPTDF
			TuIMPL2	MLPPISTIPLTFPLPNPAFTKPSLRHHLRSPSLLATFSSAAAGRACGIAGRWMGSVRASPSEAGGWAVAAAGKEGVEMERLVAVAQSAADAAGEVLRKYFRQRFEIIDKEDHSPVTIADREAEEAMTSVILKSFPTHAVFGEENGWRCAEKSADYVWVLDPIDGTKSFITGKPLFGTLIALLHNGKPVMGIIDQPILRERWVGVDGKKTTLNGQEISVRPCNVLAQAYLYTTSPHLFEGDAEDAFIRVRDKVKVPLYGCDCYAYALLASGFVDLVVESGLKPYDFLSLVPVIEGAGGSITDWEGNKLHWPVSSESQPTSFNVVAAGDSRVHGQALAALRWR
			TuIMPL3	MPLLHLSLPPHRLLVGRRRLFAPPTPPPSRISIRAAALISSAAEDGSDLPFPPERAPHHRELAAAAASVERACRLCVDVKRSLLSGGRKILEKNDQSPVTIADFGVQALISFELQQLFPSIPLVAEEDSTFLKSSNPDDNSGNVLIESISSAVTDKVKNSGSPLTHDDVLRAIDRGGKDAVSFDSNPATYWVLDPIDGTKGFLKGDDALYVVGLALVVNGKVAVGVMGCPNWTTANKKEENLDPCPGNGILMVSHVGCGTWSRHLSPEIGQLTTAQDVWKRCFVDACSVVHMARFCIPDSQTWNMIPLSLLFDSTTDESDTRDENKILLRYACCGSLCKYIMVASGRASVFFSRARVNTQIKAWDHAVGMICVQEAGGQISDWSGKPLDLAADLTGRRI…
			TuIMPL3-1	MPLLHPSLPPHRLLVVRQCRLIAPPVHPPSRLSVRSAAAAAPVAHEVCALPFPPDRASHHRELAAAVASVERACRLCVDVRASMLVGDEKILEKNDQTHVTIADFGVQALISFELQQLFPSIPLVAEEDSAFIRSSNAADSKSNTLVESISSFFTKHVNNNGPPLTHDDVLRAIDRGGKDAVSFDSNPATYWLLDPIDGTKGFLKGEDSLYVVGLALVVDGKLAVGVMGCPNLAETTVGDTEDESIAACPGHGILMVSHVGCGTWSRPMSAEISQLTTAPDVWKRCSVDPCSVAQMARFCIVDSHTWDMMPLSAHFSSTMDESEPRDENKILLQNSCGGSLSKYLLVACGRMSVFILLARAEKLLKAWDHAVGVICVEEAGGQTCDWSGKPLDFGADLT…
			TuSAL1	MSRPAGNPSYAAELGAAKKAVALAARLCQTVQQEIVQSDIQSKADKTPVTVADYGSQVLVSVVLNMEVTSGSFSMVAEEDSEDLRKDGAEEILERITDLVNKTLAEDGSYNLLLSKEAILSAIDTGKSEGGPSGRHWVLDPIDGTKGFVRGGQYAIALALLDEGRVVLGVLGCPNLPFTSVSNLSGSSSGDQTGALFSAAIGCGAEVQSLDGSPPQKISVCTIDNPANASFFESYEGAHSMRDFTGCVAEKLGVQAPPVRIDSQAKYGALARGDGAIYWRFPHEGYRETIWDHAAGSIVVTEAGGVVKDASGNDLDFSKGRFLDRDTGIIATNKQLMPSVLKCVQEAIKEKKQASSPL
			TuSBPASE	MSFSQSYRPKAARPATSFYGESLRANTARTSFPAGRQSKAASRAALTTRCAIGDSLEEFLTKATPDKNLIRLLICMGEAMRTIAFKVRTASCGGTACVNSFGDEQLAVDMLADKLLFEALEYSHVCKYACSEEVPELQDMGGPVEGGFSVAFDPLDGSSIVDTNFTVGTIFGVWPGDKLTGVTGGDQVAAAMGIYGPRTTFVVALKDCPGTHEFLLLDEGKWQHVKDTTSIGEGKMFSPGNLRATFDNPDYDKLVNYYVKEKYTLRYTGGMVPDVNQIIVKEKGIFTNVTSPTAKAKLLFEVAPLGFLIEKAGGHSSDGKQSVLDKVISVLDERTQVAYGSKNEIIRFEETLYGSSRLAASATVGATA
			TuVTC4	MAEEQFLAAAVDAAKSAGEIIRKSFYLTKNVEHKGQVDLVTETDKACEDLIFNHLRMLYPDHKFIGEETSAALGSTDDLTYDPTWIVDPLDGTTNFVHGFPFVCVSIGLTIGKIPTVGVVYNPIMNELFTAVRGKGAFLNGSPIKTSPQNELVKALMVTE
	Zea mays	12	ZmCFBP1	MPLSSFSFLRHHLPLPLQLPPTSNRQPPHPRLFHLLLPPFTPRRTFVCQPLTAATDDMAAAAAAASPPTLLEHMGQAGTAADLTVLVAHIQSACKRIAALVASPGNAELSRAKARGGAMAAGRDAPKPLDELSNDIILSALQSSGKVAALASEENDLPIWISDGGPYVVVTDPLDGSRNIEVSIPTGTIFGIYNRLVEVDHLPLEERAQLNSLQSGTRLVAAGYVLYSSATILCISFGAGTHAFTLDWSTGEFILTHPSIQIPPRGQIYSVNDARYFDWPEGLRKYIDTIRQGKGQHPKKYSARYVCSLVADFHRTLIYGGVAMNPRDHLRLVYEANPLSFLAEQAGGRGSDGKNRILTIQPVKLHQRLPLFLGSMDDMLELESYGDVQQKVNPGYEV
			ZmCFBP1-1	MDHAADAHRTDLMTITRHVLNEQSRNPESRGDFTILLSHIVLGCKFVASAVNKAGLAQLIGLAGETNVQGEEQKKLDVLSNEVFVKALVSSGRTCVLVSEEDEEATFVDPKLRGRYCVCFDPLDGSSNIDCGVSIGTIFGIYIIKDKDNVTLEDVLQPGKNMLAAGYCMYGSSCTLVLSTGTGVNGFTLDPSLGEFILTHPDIKIPKKGKIYSVNEGNAKNWDAPVAKFVEKCKYPKDGSPPRSLRYIGSMVADVHRTLLYGGVFLYPADEKNPNGKLRILYEVFPMSFLMEQAGGQSFTGKERALDLIPTKIHDRSPIFLGSYDDVEEIKALYAEQAKSSSASS
			ZmFBP1	MDHAAEAQRTDLMTITRHVLNEQSRHPESRGDFTILLSHIVLGCKFVAAAVNKAGLAKLIGLAGETNVQGEEQKKLDVLSNEVFVKALVSSGRTCVLVSEENEEAIFVDPALRGKFVNPLLLHPDLVKVPQRRTVAFPDRVLVLSLSLFRYCVCFDPLDGSSNIDCGVSIGTIFGIYMVKDKDNVTLEDVLQPGTNMLAAGYCMYGSSCTLVLSTGNGVNGFTLDPSLGEFILTHPNIKIPRKGKIYSVNEGNAKNWDGPTAKFVEKCKYPEDGSPPRSLRYIGSMVADVHRTLLYGGIFLYPADQKSPNGKLRVLYEVFPMSFLMEQAGGQAFTGKQRALELAPAKLHDRSPVFLGSYDDVEEIKALYASMSNSG
			ZmFBP2	MAAAATTSSSSHLLLLSRQQAASLRCRLSFLGQPARRSGRVTAQAPAAKDVRCMAAVDTAASAAAAETSPKSSSYEIVTLTTWLLQQERTGAIDNEMTIVLASISTACKQIAALVQRAPISNLTGVQGAVNVQGEDQKKLDVVSNEVFSNCLKSSGRTGVIASEEEDVPVAVEQSYSGNYIVVFDPLDGSSNIDAAVSTGSIFGIYNPNDECLADVDDNDTLDSVEQRCIVNVCQPGSNLLAAGYCMYSSSVIFVLTVGTGVYVFTLDPMYGEFVLTQEKVQIPKAGKIYAFNEGNYALWDDKLKLYMDSLKEPGDSGKPYSARYIGSLVGDFHRTLLYGGIYGYPRDKKSKNGKLRLLYECAPMSFIVEQAGGKGSDGHQRILDITPTEIHQRVPLYI…
			ZmHL	MGSLRVVGWAWTAAAAPEWGVHRRCCRGTPLARPRAATSSLGAGQLRVGTEHGWLWDCRGGGGAGDYAREMEVAVRVVQVACTLCQRVQDSLLRPGPDAAGGDGRVHAKLDRSPVTVADWGVQAIVSWLLSSSFHDEDISIIAEEDDETLSSSDGVTLLESVVEAVNGCLVEAPNYGLRSPEKELRAHDVIQAIRKCSSTGGPKGRFWVLDPVDGTLGFVRGDQYAIALALIEDGEVILGVLGCPNYPMKKEWLNYHQKYYRLMSKVAPPPLGSWHKGCVMYAQKGCGQAWMQPLVHDFGKLNWHHPREIQVSSISDPISATFCEPVEKANSSHSFTAGLAQSVGLRNQPLRVYSMVKYAAIARGDAEIFMKFARAGYKEKIWDHAAGVVIIQEAGGVV…
			ZmIMPL1	MARYLLAPTSTSSSTFLPKDGVKNSPTSRPLRLRALGSRTSKARHIMAVASEQAAPPARYPKVAAPTTGPIPAAELLGVIEAAAKAGADVIMEAVNKPRNIHYKGVADLVTDTDKLSESVILEVVTKNFKDHLILGEEGGLVGDSLSEYLWCIDPLDGTTNFAHGYPSFSVSISVLFRGKPAASTVVEFCGGPMCWSTRTISASAGGGAYCNGQKIHVSQTDKVEQSLLVTGFGYEHDDAWTTNMNLFKEFTDISRGVRRLGSAAADMSHIGLGITEAYWEYRLKPWDMAAGVLIVEEAGGVVTRMDGGEFTVFDRSVLVSNGLVHGQLLDRIGPPTEDLKKKGIDFSLWFKPDKYPTDF
			ZmIMPL2	MLSSSSSTHSATSPFPGLASANPNPRSRLLRLRAASPVSSAVLSASGRQPMSTVRASFAAGAAGRRAAAVGELATERLVEVAQRAADAAGEVLRKYFRQRVEIIDKEDHSPVTIADREAEEAMVSVILKSFPTHAIFGEENGWRCAENSADFVWVLDPIDGTKSFITGKPLFGTLIALLHNGKPVIGVIDQPILRERWIGVDGKQTTLNGQEISVRSCNLLAQAYLYTTSPHLFEADAEDAFIRVRNKVKVPLYGCDCYAYALLASGFVDIVVESGLKPYDFLSLVPVIEGAGGSITDWRGDKLHWPVTAESRPTSFNVVAAGDARVHKEALDALRWR
			ZmIMPL3	MPLLHLSLPSHRLLVGGRGRLFFPSSPRRICLSVRAAGDAAVSVAAGAYGLPFRPEGAAHHRELSAAVAVVERACCLCVDVKRSLFSRRSSILEKNDQSPVTVADFGVQALISLELQRLFPSIPLVAEEDSASLRSSKADDNSSDILVESIFSAVVDKVSNNGSHLTQDDVLRAIDRGGKDAVSFDSNPATYWVLDPIDGTKGFLRGNDALYVVGLALVVNGKVTVGVMGCPNWTNDDIVNKKDDSVAACNGRGILMVSHIGCGTWSRRLSADIGQLNTAQDIWKRCFVDTCSIAHMAHYCIPDSQTWDMIPLSATYDSTTDATDPRNENEILLLSVFCGSLCKYLTIASGRASVFVLQARPTTQIKSWDHAVGVICVQEAGGQTSDWSGEPLDLAADL…
			ZmSAL1	MSQATEVVGNPYAAELAAAKKAVALAARLCQRVQRSILHSDIQSKADKTPVTVADYGSQVLVCLVLKKELPSHSFSIIAEEDSKDLREDGAQEIIEHITTLINETIVNDGSYNMSLSKEDVLSAIDGGKSEGGPSGRHWILDPIDGTKGFIRGDQYAVALGLLDEGKVVLGVLGCPNLPLKSTNKNNSSSFGDRIGSLFFATIGCGAQVEALEGSEPQKISVCSTNNPVDASFFESFEASHSKRDLTSSIAEKLGVRAPPVRMDSQAKYGALARGDGAIFLRIPHKSYIETVWDHAAGSIIVTEAGGMVKDAAGNDLDFCKGRYLDRDRGIIATNKHLMPLVLKAVQEAMKEEQ
			ZmSAL1-1	MAARVGLLPHAILVSSRALPTPRARVPYPLPPVPSYLRHASSSASRSCRASPRFVAVRAMASGNPYAAELAAAKKAVTLAAKLCQTVQQDIMHSGVQAKADKSPVTVADYGSQILVGFSLKMDVSSGPFSLVAEEDSDELRKDGAEEILEDITDLVNETIFDDGSYNISFTKEGILSAIDDGKSEGGPSGRHWVLDPIDGTKGFLRGDQYAIALALLDEGKVVLGVLACPNLPLSSINNINGNSSGDKVGALFSATIGCGAQVESLDGSPPQKISVCSIDNPVNASFFESYESAHSMHDLTGSIAEKLGVQAPPVRIDSQAKYGALARGDGAIYLRFPHKGYREKIWDHAAGSIVVTEAGGIVTDAAGNDLDFSKGRFLDLDTGIIATNKELMPSLLKA…
			ZmSBPASE	MEIVATRSPACCAAVSFSQSYRPKASRPPTTFYGESVRVNTARPLSARRQSKAASRAALSARCEIGDSLEEFLTKATPDKNLIRLLICMGEAMRTIAFKVRTASCGGTACVNSFGDEQLAVDMLANKLLFEALEYSHVCKYACSEEVPELQDMGGPVEGGFSVAFDPLDGSSIVDTNFTVGTIFGVWPGDKLTGVTGGDQVAAAMGIYGPRTTYIVALKDCPGTHEFLLLDEGKWQHVKDTTTIGEGKMFSPGNLRATFDNPEYDKLINYYVKEKYTLRYTGGMVPDVNQIIVKEKGIFTNVTSPTAKAKLRLLFEVAPLGFLMEKAGGYSSDGKQSVLDRVINELDERTQVAYGSKNEIIRFEETLYGSSRLAASATATARALI
			ZmVTC4	MSEEQFLAVAVEAAKSAGEIIRKGFYQTKNVEHKGQVDLVTETDKACEDLIFNHLRKHFPDHKFIGEEESAALGATADLTDDPTWIVDPLDGTTNFVHGFPFVCVSVGLTIGKIPTVGVVFNPIMNELFTAVRGKGAFLNGSPIKASSQDELVKALLVTEAGTNRDKTTVDDTTNRINRLLYKIRSIRMCGSLALNMCGVACGRLDLCYEIGFGGPWDVAAGAVILQEAGGLVFDPSGGEFDLMSRRMAGSNSLLKDKFVKELGDTN
Eudicots	Arabidopsis thaliana	13	ALX8	MAYEKELDAAKKAASLAARLCQKVQKALLQSDVQSKSDKSPVTVADYGSQAVVSLVLEKELSSEPFSLVAEEDSGDLRKDGSQDTLERITKLVNDTLATEESFNGSTLSTDDLLRAIDCGTSEGGPNGRHWVLDPIDGTKGFLRGDQYAVALGLLEEGKVVLGVLACPNLPLASIAGNNKNKSSSDEIGCLFFATIGSGTYMQLLDSKSSPVKVQVSSVENPEEASFFESFEGAHSLHDLSSSIANKLGVKAPPVRIDSQAKYGALSRGDGAIYLRFPHKGYREKIWDHVAGAIVVTEAGGIVTDAAGKPLDFSKGKYLDLDTGIIVANEKLMPLLLKAVRDSIAEQEKASAL
			CFBP1	MAATAATTTSSHLLLSSSRHVASSSQPSILSPRSLFSNNGKRAPTGVRNHQYASGVRCMAVAADAAETKTAARKKSGYELQTLTGWLLRQEMKGEIDAELTIVMSSISLACKQIASLVQRAGISNLTGVQGAVNIQGEDQKKLDVISNEVFSNCLRSSGRTGIIASEEEDVPVAVEESYSGNYVVVFDPLDGSSNIDAAVSTGSIFGIYSPNDECIVDDSDDISALGSEEQRCIVNVCQPGNNLLAAGYCMYSSSVIFVLTLGKGVFSFTLDPMYGEFVLTQENIEIPKAGRIYSFNEGNYQMWDDKLKKYIDDLKDPGPTGKPYSARYIGSLVGDFHRTLLYGGIYGYPRDAKSKNGKLRLLYECAPMSFIVEQAGGKGSDGHSRVLDIQPTEIHQRV…
			CYFBP	MDHAADAHRTDLMTITRFVLNEQSKYPESRGDFTILLSHIVLGCKFVCSAVNKAGLAKLIGLAGETNIQGEEQKKLDVLSNDVFVNALVSSGRTSVLVSEEDEEATFVEPSKRGKYCVVFDPLDGSSNIDCGVSIGTIFGIYTLDHTDEPTTADVLKPGNEMVAAGYCMYGSSCMLVLSTGTGVHGFTLDPSLGEFILTHPDIKIPNKGNIYSVNEGNAQNWDGPTTKYVEKCKFPKDGSPAKSLRYVGSMVADVHRTLLYGGIFLYPADKKSPNGKLRVLYEVFPMSFLMEQAGGQAFTGKKRALDLVPEKIHERSPIFLGSYDDVEEIKALYAEEEKKN
			HL	MAVDSLETEIDTAVRVVHLASSLCVKVQEKLHLPNGGHVKSKDDDSPVTVADFGVQAIVSWVLAEVFGDQNLSIVAEEDTETLSEADSLGLLGAVSNAVNEALSEAQNYGLPKPVKPLGSSEILKAISRCNSVGGPKGRHWVLDPVDGTLGFVRGDQYAVALALIENGKVLLGVLGCPNYPVKKECLSNGCNQAMKTKAVAGSVSKGCVMYAKRGSGQAWMQPLIVGGIPESATLLKVSSVDDPVLATVCEPVERANSNHLFTAGLANSMGVRKQPMRVYSMVKYAAIARGDAEVFMKFAQSSYKEKIWDHAAGVVIVEEAGGVVTDAGGRNLDFSKGVYLEGLDRGIIACSGQVLHEKIIGAVYASWESSSL
			IMPL1	MGRSLIFSGNMSLRISHLPRSSLPLQNPISGRTVNRTFRYRCTRILSNSFKSTTRLQTKAVLSEVSDQTRYPRIGAKTTGTISPAHLLEVVELAAKTGAEVVMEAVNKPRNITYKGLSDLVTDTDKASEAAILEVVKKNFSDHLILGEEGGIIGDSSSDYLWCIDPLDGTTNFAHGYPSFAVSVGVLYRGNPAAASVVEFVGGPMCWNTRTFSATAGGGALCNGQKIHVSKTDAVERALLITGFGYEHDDAWSTNMELFKEFTDVSRGVRRLGAAAVDMCHVALGIAESYWEYRLKPWDMAAGVLIVEEAGGAVTRMDGGKFSVFDRSVLVSNGVLHPKLLERIAPATENLKSKGIDFSLWFKPEDYHTEL
			IMPL2	MRLHNRDLSIQTFSVVDDWLFRELPTHSKMLAQSHFFSKSFDLIPPQSPALRSANPSLRISSSYSNSRLSFLSSSAIAVPVSRRRFCLTMASNSKRPNISNESPSELSDTELDRFAAVGNALADASGEVIRKYFRKKFDIVDKDDMSPVTIADQMAEEAMVSIIFQNLPSHAIYGEEKGWRCKEESADYVWVLDPIDGTKSFITGKPVFGTLIALLYKGKPILGLIDQPILKERWIGMNGRRTKLNGEDISTRSCPKLSQAYLYTTSPHLFSEEAEKAYSRVRDKVKVPLYGCDCYAYALLASGFVDLVIESGLKPYDFLALVPVIEGAGGTITDWTGKRFLWEASSSAVATSFNVVAAGDSDIHQQALESLEWH
			IMPL3	MYILDTGARFSAVRFSPVFNPPPTSLRRRYFIVRANLPFPKHQAKYHKELEVAIDAVDRACRLCVDVKRSLFSSKEKIVEKNDQTPVTIADFGVQALVSLELSKLFPSIPLVAEEDSHFVRANNLVSSVVSEVKSKASIGDNHLSDADVLEAIDRGGKDAYTFCNKPATYWVLDPIDGTRGFLKGDEALYVVGLALVVDNEIVLGVMGCPNWPGDSSDGSTGTLMLSHIGCGTWTKKLQNVSGNVAGDWIRCFVDACVLMNKARFCIQESQTWESLPLSGFFDASTVSEDLKHKEILLLPTCCGSLCKYLMVASGRASVFLLRAKTQRTIKSWDHAVGIICVHEAGGKVTDWEGDEINLEEDQSERRLIFPAGGVVVSNGSLHNQILEMISSASPTL
			IMPL4	MPYEKELAAAKKAVSLAARLSQEVQKSLLQSDVRSKSDKSPVTAADYGSQAVISHVLERELHPEPLYLVAEENAEDLHKNGAEEFLESITKLVNNALASDDSYANSSLSMDDVRKAIDHGRSQGGSSGRHWILDPVDGTRGFVKGEEYAVALALLVEGKVVLGVMACPKLENHKSSSSGCLFFATVGEGAYVQSLEGDSHPPQKVQVSNIENPEEATFVESSHKPIPIHSSIANKLGIKAPPLRIHSQVKYAALARGDAEIYLRFTLKGYREFIWNHAAGAIITTEAGGVVCDADGNPLDFSRGNHLEHKTGIVVSTKNLMPRLLKAIRESIEEEMLLSETQLKL
			IMPL5	MSYDEMLSAAKKAVSLAARLSNEVRKSLLVTDVWNKSDDSPVTVADYGSQAVVSLVLERELQNEPVSLVAEEDSGELRKIAAETVLARITELVKDTLASDESYAIASPLTSDDVLNAIDRGKSEGGPKGRHWILDPIGGTRGFIRGEQYAIGLALLVEGKVVLGVMACPKLPLASTAGNALKSLPEKVGCLFYGSVGNGTYVQSLSVDSLPAKVEVSSIDDPAKASFFESYHTPVPIHNTIATKLGIKESPIKINSQTKYAALSRGDGEVYLRFTRKARPESIWNHAAGSIIVSEAGGKVTDAAGNPLDFSKGKYLDYKRGIVVTTQKLLPRLLTAVRESIKEEEEEEEKAASLKLH
			SAL2	MSYEKELAAAKKAVTLAARLSQEVQKTLLQSQVWKKSDRSPVTAADYGSQAVVSLVLERELQPDKLSLVAEEETGDLRKNGSEAFLEDIAKLVKDTLASEESYTSSPLSTDDVLNAIDCGKSEGGCKGSHWVLDPIDGTRGFVRGEQYAVGLALLVEGKVVLGVMACPNLPLASAVCATDNSSQEDVGCLFFATTGSGTYVQSLKGNSLPQKVQVSSNENLDEAKFLESYHKPIPIHGTIAKKLGIKALPVRIDSQAKYAALSRGDAEIYLRFTLNGYRECIWDHAPGSIITTEAGGVVCDATGKSLDFSKGKYLAHKTGIIVTTKKLKPWILKAVRESIEEENLYF
			SBPASE	METSIACYSRGILPPSVSSQRSSTLVSPPSYSTSSSFKRLKSSSIFGDSLRLAPKSQLKATKAKSNGASTVTKCEIGQSLEEFLAQATPDKGLRTLLMCMGEALRTIAFKVRTASCGGTACVNSFGDEQLAVDMLADKLLFEALQYSHVCKYACSEEVPELQDMGGPVEGGFSVAFDPLDGSSIVDTNFTVGTIFGVWPGDKLTGITGGDQVAAAMGIYGPRTTYVLAVKGFPGTHEFLLLDEGKWQHVKETTEIAEGKMFSPGNLRATFDNSEYSKLIDYYVKEKYTLRYTGGMVPDVNQIIVKEKGIFTNVTSPTAKAKLRLLFEVAPLGLLIENAGGFSSDGHKSVLDKTIINLDDRTQVAYGSKNEIIRFEETLYGTSRLKNVPIGVTA
			VTC4	MADNDSLDQFLAAAIDAAKKAGQIIRKGFYETKHVEHKGQVDLVTETDKGCEELVFNHLKQLFPNHKFIGEETTAAFGVTELTDEPTWIVDPLDGTTNFVHGFPFVCVSIGLTIGKVPVVGVVYNPIMEELFTGVQGKGAFLNGKRIKVSAQSELLTALLVTEAGTKRDKATLDDTTNRINSLLTKVRSLRMSGSCALDLCGVACGRVDIFYELGFGGPWDIAAGIVIVKEAGGLIFDPSGKDLDITSQRIAASNASLKELFAEALRLTGA
			FBP1	MQSLTLTRYPTPISPPRLNLYPLRQIAASVLSAPTAGINRRDMASRHQSTSFKPLAVGRNLTGDDDDGYCTLIDFAGSGGGEGKNVGEDLVVLLYHLQHACKRIASLVASPFNSSLGKLSVNSSSGSDRDAPKPLDIVSNDIVLSSLRNSGKVAVMASEENDSPTWIKDDGPYVVVVDPLDGSRNIDASIPTGTIFGIYNRLVELDHLPVEEKAELNSLQRGSRLVASGYVLYSSATIFCVTLGSGTHAFTLDHSTGEFVLTHQNIKIPTRGQIYSVNDARYFDWPEGLRKYIDTVRQGKGQNPKKYSARYICSLVADLHRTLLYGGVAMNPRDHLRLVYEGNPLAFLVEQAGGKSSDGKRGILSIQPVKLHQRLPLFLGSLEDVAELESYGDVQQTVN…
	Solanum lycopersicum	17	SlCFBP1	MAATATTSYLSALDKKTPFLFALDKKTPFLCPKNSTKRRSFNGGVKCMAIETASGVTQTKKKSGYELQTLTSWLLRQEQAGVIDAELTIVISSISMACKQIASLVQRAGISNLTGVQGAVNIQGEDQKKLDVVSNEVFSNCLRSSGRTGIIASEEEDVPVAVEESYSGNYIVVFDPLDGSSNIDAAVSTGSIFGIYSPNDECLADLGDDSTLDNIEQKCIVNVCQPGTNLLAAGYCMYSSSVIFVLTLGNGVFSFNLDPMYGEFVLTQENVQIPKSGKIYSFNEGNYQLWDDKLKKYIDDLKDPGPSGKPYSARYIGSLVGDFHRTLLYGGIYGYPRDRKSKNGKLRLLYECAPMSFIVEQAGGKGSDGHQRVLDIQPTEIHQRVPLYIGSTEEVEKLE…
			SlCFBP1-1	MAEALLGTKCSSSSSISHLSPNFHLFPTNIKRSQHLIHGNFSPNSRIRREAASLEGAKTAPAQIKKPKNRYEMVNLTTWLLQQEQAGNIDAELAIVLSSISLACKQIASLLQRSSIVNITGTQGTVNIQGEDQKKLDVISNELFCNCLRSSGRTGIIASEEEDVPVAVEETYSGNYIVVFDPIDGSANIDIALTTGSIFGIYGPDQQCLVDMDDDSTIDQAREKCIVSVCQPGSNLVAAGYCLYSSSVVYTLSVGNGVYAFTLDPAYGEFVLTHEDIKIPKAGRIYSFNEGNYDLWDEKLQSYLDHLKQPGPNGKPYSGRYIGCLVGEIHRMLLYGGIYGNPKNKNSKNGNLRLLYECAPMSYIIEQAGGKATDGNQRILEIMPEQIHQRTPIFIGSPE…
			SlCFBP1-2	MLQTLTSWLLKQEQDGVIDAIVLSRISTACKLIASLVQRAGISKLTGEEQKKLDIVSNEVFSNCMRASGRTGIIASEEEHVPVAVEESYYGNYIVVFDPLDGSSNIDAAVSTGSIFGIYTPNDDCLLDLEDSTTLDNVEQRCIANVCQPGNNLLAAGYCMYSSSVIFVLTLGNGVYSFTLDPMFGEFILTQKNIQVANAGKIYAFNEGNYQLWDDRLKKYIDHLKDPGPIGKPYSARDKKSRNGKLRLLYECAPMSFIVKQAGGKGSDGQQRILDIQPVEIHQRVPLYIGSIEEVEILEKYFS
			SlCYFBP	MSILASTACPISCTKIESTMDHAADAHRTDLMTITRFVLNEQTKHPESRGDFSILLSHIVLGCKFVCTAVNKAGLAKLLGLAGETNVQGEDQKKLDVLSNEVFIKALVSSGRTCILVSEEDEEATFVEPANRGKYCVVFDPLDGSSNIDCGVSIGTIFGIYMIKDGHEPTLDDVLQPGMNMLAAGYCMYGSSCTLVLSTGSGVNGFTLDPSLGEFILTHADIKIPKKGKIYSVNEGNAKNWDGPTSKYVQNCKYPADGSSPKSLRYIGSMVADVHRTLLYGGIFLYPGDKKSPNGKLRVLYEVFPMSFLMEQAGGQAFTGKQRALDLVPEKIHERSPIFLGSYDDVEEIKNLYAAEEQN
			SlCYFBP1-1	MDHAADAHRTDLMTITRFVLNEQSKYPESRGDFTILLSHIVLGCKFVCTAVNKAGLAKLLGLAGETNVQGEDQKKLDVLSNEVFIKALVSSGRTCILVSEEDEEATFVEPSKRGKYCVVFDPLDGSSNIDCGVSIGTIFGIYMMKDVHEPTLDDVLQPGKNMLAAGYCMYGSSCTLVLSTGKGVNGFTLDPSLGEFILTHPDIKIPKKGKIYSVNEGNAKNWDGPTSKYVESCKFPTDGSSPKSLRYIGSMVADVHRTLLYGGIFLYPADKKSPNGKLRVLYEVFPMSFLMEQAGGQAFTGKERALDLVPTKIHERAPIFLGSYDDVEEIKRLYAAEEKN
			SlFBP1	MLSSTISSLNFPPRTKLSSPNPAIFPQNYNFVPFCTENMASSPFSGGLINSRVDSPIAIGCKNASVDSANSGFSTLMEYMGKGGVDVGDDLVLLFGHLEYASKKIAALVACPFNSSLNNNVAIGNTGTSSDRDKPKPLDIVSNEIILSSLRNSGKVAVMASEEDECPVWITDDGPFVVVMDPLDGSRNIDASIPTGTIFGIYRRLVEIDHLPVEEKALLNCLQSGSKLVAAAYVLYSSATILCASFGSGTHAFTLDHTTGDFLLTHPNINIPPRGQIYSVNDARYFDWPEGLRQYIDTIRQGKGQHPKKYSARYICSLVADFHRTLLYGGVAMNPRNHLRLVYEANPLSFLAEKAGGRGSDGKNRILSIQPVKLHQRLPLFLGSLEDIEELQSYGDVQQ…
			SlHL	MSSCTTSFSTKVSPTFRKNDIFLKKQMLGTISFSSKKDSYLGFTAQTSSQTDFVSAMDEDCKLELKSNYISDGYCKELEIAVRAVHMACLLCQRVQENLLSETSEHVHSKEDDSPVTIADWSVQAIVSWVLSEAYGSNVSIVAEEDVEALSKASAAGLLEAVVRTVNECLADAPRFGLKGPGTDLDAKAVLEAISRCSLAGARGSKFWVLDPVDGTLGFVRGDQYAIALALIEDGEPVLGVLGCPNYPMKKEWLSYQNGYRRILSRLSSSTSESSDRGSVLYARKGGGRAWMQPLLRGESKFVWPNAAREIRVSSIDNPALATFCEPVEKANSSHSFTAGLAHSVGLRNQPLRVYSMVKYAAIARGDAEIYMKFARAGYKEKIWDHAAGVLIIEEAGGV…
			SlHL-1	MEKEKYSEELNVAVRVVHMACSLCQKVQKGLLGKAFGDDDEVKSKDDDSLVTIADWSVQATVSWILSNTFGSEFVSIVAEEDVQTLSKPESAGLLGKVVSTVNECLAQASRYGLKGPDKILGPSEILEAISRCNSKGGPLGRHWVLDPVDGTLGFVRGGQYAVALALIDNAEVVVGVLGCPNYHMKRDRHNKQQQNHISSEVPVPSPDMLEEGCVMYSKKGTGEAWVQPTVYGDGKYEWPNFAKQVRVSPIDDPALATFCEPVERANSNHSFAAGLASSVGLRNKPLRVYSMVKYAAIAQGDAEIFMKFARAGYKEKIWDHAAGVLIVQEAGGVVTDAGGRSLDFSKGIYLESLDRGIVACSGTKLHEKLIGAVYASWESSSL
			SlIMPL1	MGRCLLSSTISSLRICQLPRIRLPVFPKSRSTNSQYGFCTSLSTGGGFCTKAALSEVGIKKEYSKVAADSTGSIPSSELLKVVEAAAKTGAQVVMDAVNKPRNVTYKGLTDLVTDTDKNSEFAILEVVRKNFPDHLILGEEGGIIGDSSSDYLWCIDPLDGTTNFAHGYPSFAVSVGVLFRGKPAAAAVVYAEIVSDVEFVGGPMCWNTRIFSAAAGKGAFANGEKIHVSRTDKVEQSLLVTGFGYEHDDPWATNMELFKEFTDVSRGVRRLGAAAVDMCHVALGIAEAYWEYRLKPWDMAAGVLIVEEAGGTVSCMDGGSFSVFDRSVLVSNGLLHAKLLEKIGPATENLKSKGIDFSVWFKPENYHTEV
			SlIMPL1-1	MGRCLLSSTISSLRICQLPRIRLPVFPKSRSTNSQYGFCTSLSTGGGFCTKAALSEVGIKKEYSKVAADSTGSIPSSELLKVVEAAAKTGAQVVMDAVNKPRNVTYKGLTDLVTDTDKNSEFAILEVVRKNFPDHLILGEEGGIIGDSSSDYLWCIDPLDGTTNFAHGYPSFAVSVGVLFRGKPAAAAVVYAEIVSDVEFVGGPMCWNTRIFSAAAGKGAFANGEKIHVSRTDKVEQSLLVTGFGYEHDDPWATNMELFKEFTDVSRGVRRLGAAAVDMCHVALGIAEAYWEYRLKPWDMAAGVLIVEEAGGTVSCMDGGSFSVFDRSVLVSNGLLHAKLLEKIGPATENLKSKGIDFSVWFKPENYHTEV
			SlIMPL2-1	MQMLSQSHFLSLYPRNSSPLSSSFSAFSGGCNTRKIVSGSLAFQHSGIHSFPISHGIKLASPVMTSNCVLPSNQAQIVDFGVEDSELGKFAAVGNKIADAAGEVIRKYFRKSFDILDKEDLSPVTIADQAAEESMVKIIQENFPSHAIYGEEKGWRCQEETAEYVWVLDPIDGTKSFITGKPVFGTLIALLYKGKPLSLDVRRVPAYDTLGNLLLYYATILGVIDQPVLRERWIGLSGRRTTLNGQEISTRNCSSLSKAYISTYQGYQYVLHLLSHFRSFKFRYTTSPHLFEGDAEIAFARVRSKVKVPLYGCDCYAYALLASGFVDLVVESGLKPYDFLSLVPVIEGAGGTITDWKGQHFNWKASAGSPATSFNVVAAGDKEVHQEALDALQWR
			SlIMPL3	MDLLRYSASRYPAAHLQLPFRTPLRRRFVAVRSSLSLPFAEQKAKYYSELEAAVDVVERACRLCVDVKKSLFSSDGRILEKNDQTPVTIADFGVQALVSLEMNKLFPSIPLVAEEDSAFLRSNNLVGSVVDVVKDKATLGDEVTEDNILKAIDRGGKDAYVFAPEPATYWILDPIDGTRGFVRGSEALYVVGLALVVEGKIVLGVMGCPNWHEDCSDNSIIGVQENQSSRSGIIMVSHVGCGTWTKRLSDILSNESPHTWTRCSVDSCQMVQGARVTIPESQAWKSLPLSGLFDAKTDSENIGEGNILLLSACCGSLCKYLMVASGRASVYIQGKKATSIIKVWDHAVGIICVHEAGGKVFLREVTDWEGSSLDFAADQTERRLIFPSGGVLVTNGSLH…
			SlSAL1	MATFTGLSSRSINSLTQKTLPLLTKNTKPHFPFSLLLTLRASKSTLRAVTMSYDKELDAAKNAASLAARLCQKVQKALLQADVQSKSDKSPVTVADYGSQAVVSVVLQKELCSASFSLVAEEDSGDLRNEEGKSTLQRIMKLVNETLASDGTYGTAPLSEEDVLAAIDSGRSEGGPSGQHWVLDPIDGTKGFLRGDQYAIALGLLDEGKVVLGVLACPNLPLSSLASHNLQDDQDKVGCLFYAQVGSGTYMQSLDGSTPIKVHVTDLDNPEEASFFESFEAAHSLHDLSSLIAKKLGVKAPPVRIDSQAKYGALSRGDGAIYLRFPHKGYREKIWDHAAGYLVVAEAGGVVSDAAGNPLDFSKGRYLDLHEGIIVTNQKLMPALLKAVKESLNEKASSL
			SlSBPASE	MRFLQSLKSSSLFGESLRVAPKSSLKVSRTKNSSLVTKCEIGDSLEEFLSKSTSDKGLIRLMMCMGEALRTIAFKVRTASCGGTACVNSFGDEQLAVDMLADKLLFEALTYSHFCKYACSEEVPELQDMGGPAEGGFSVAFDPLDGSSIVDTNFTVGTIFGVWPGDKLTGITGREQVAAAMGIFGPRTTYVLALKDVPGTHEFLLLDEGKWQHVKDTTEIGEGKMFSPGNLRATFDNPDYAKLIEYYVKEKYTLRYTGGMVPDVNQIIVKEKGIFTNVTSPTAKAKLRLLFEVAPLGFLIEKAGGYSSDGKQSVLDKVIVNLDDRTQVAYGSKNEIIRFEETLYGSSRLKAGAPVGAAV
			SlVTC4	MEEFVDVAIEAAKKAGEIIRHGFYKSKHIEHKGVVDLVTETDKACEVLIFNHLKQCFPSHKFIGEETTAAASGNFELTDEPTWIVDPLDGTTNFVHGFPFVCVSIGLTIEKKPVVGVVYNPIIDELFTAIYGRGAFLNGKSIRVSSESQLVKALVATEVGTNRDKAIVDATTGRINRVIFKVRSLRMSGSCALNLCGVACGRLDLFYEIEFGGPWDVAAGALIVIEAGGLVLDPSGSEFDLTARRVAATNAHLKDAFINALNESE
			SlVTC4-1	MARNGSLEEFLAVAVDAAKRAGEIIRKGFHETKHVVHKGQVDLVTETDKACEDLIFNHLKQHFPSHKFIGEETSAATGDFDLTDEPTWIVDPVDGTTNFVHGFPSVCVSIGLTIGKIPTVGVVYDPIIDELFTGINGKGAYLNGKPIKVSSQSELVKSLLGTEVGTTRDNLTVETTTRRINNLLFKVRSLRMCGSCALDLCWVACGRLELFYLIGYGGPWDVAGGTVIVKEAGGVLFDPSGSEFDITSQRVAATNPHLKEAFVEALQLSEYVS
			SlVTC4-2	MAQNGSVEQFLDVAVEAAKKAGEIIREGFYKTKHVEHKGMVDLVTETDKACEDFIFNHLKQRFPSHKFIGEETTAACGNFELTDEPTWIVDPLDGTTNFVHGFPFVCVSIGLTIEKKPTVGVVYNPIIDELFTGIDGKGAFLNGKPIKVSSQSELVKALLATEAGTNRDKLVVDATTGRINSLLFKVRSLRMCGSCALNLCGVACGRLDLFYELEFGGPWDVAGGAVIVKEAGGFVFDPSGSEFDLTARRVAATNAHLKDAFIKALNE
	Nicotiana attenuata	15	NaCFBP1	MAASSATATTSFLCALDKKTPFLCTLDKKGTPFLCPKGSSTKRRSFNGGVKCMAIETAAGATKTRKRSGYELQTLTSWLLRQEQAGTIDAELTIVISSISMACKQIASLVQRSGISNLTGVQGAVNIQGEDQKKLDVVSNEVFSNCLRSSGRTGIIASEEEDVPVAVEESYSGNYIVVFDPLDGSSNIDAAVSTGSIFGIYSPNDECLADHGDDSTLDNVEQRCIVNVCQPGSNLLAAGYCMYSSSVIFVITLGNGVFAFNLDPMYGEFVLTQENIQIPKSGKIYSFNEGNYQLWDDKLKKYIDDLKDPGPSGKPYSARYIGSLVGDFHRTLLYGGIYGYPRDKKSKNGKLRLLYECAPMSFLVEQAGGKGSDGHQRVLDIQPTEIHQRVPLYIGSTEE…
			NaCFBP1-1	MAEAIPRFTWNTKFSSSCSISRLSPNFHLLPTNTKRSQQLNNGNSNSNSNSRIRCEAVGVEGAKTTPTQIKKPINRYEMVNLTTWLLRQEQAGNIDAELAIVLSSISLACKQIASLLQRSSIVNLTGAQGTVNIQGEDQKKLDVISNELFCNCLRSSGRTGIIASEEEDVPVAVEETYSGNYIVVFDPIDGSANIDIALTTGSIFGIYGPDQLCLVDMDDDSTIDQAREKCIVSVCQPGSNLVAAGYCLYSSSVVFTLSVGNGVYAFTLDPAYGEFVLTHEDIKIPKAGRIYSFNEGNYDLWDEKLQNYLDHLRQPGPNGKPYSGRYIGCLVGEIHRMLLYGGIYGNPKNKNAKKGNLRLLYECAPMSYIIEQAGGKATDGTQRILDIMPEQIHQRTPI…
			NaCYFBP	MDHVADAHRTDLMTITRFVLNEQSKHPESRGDFTILLSHIVLGCKFVCSAVNKAGLAKLLGLAGETNVQGEDQKKLDVLSNEVFIKALVSSGRTCILVSEEDEEATFVEPAKRGKYCVVFDPLDGSSNIDCGVSIGTIFGIYMMKDAHEPTLDDVLQPGKNMLAAGYCMYGSSCTLVLSTGKGVNGFTLDPSLGEFILTHPDIKIPKKGKIYSVNEGNAKNWDGPTSKYVENCKFPKDGSSPKSLRYIGSMVADVHRTLLYGGIFLYPADKKSPNGKLRVLYEVFPMSFLMEQAGGQAFTGKQRALDLVPKKIHDRAPIFLGSYDDVEEIKRLYAAEEKN
			NaCYFBP1-1	MDHSADAHRTDLMTITRFVLNEQSKHPESRGDFSILLSHIVLGCKFVCTAVNKAGLAKLLGLAGETNVQGEDQKKLDVLSNEVFIKALVSSGRTCILVSEEDEEATFVEPAKRGKYCVVFDPLDGSSNIDCGVSIGTIFGIYMIKDGHEPTLDDVLQPGKNMLAAGYCMYGSSCTLVLSTGSGVNGFTLDPSLGEFILTHPDIKIPKKGKIYSVNEGNAKNWDGPTSEYVQKCKYPTDGSSPKSLRYIGSMVADVHRTLLYGGIFLYPADKKSPNGKLRVLYEVFPMSFLMEQAGGQSFTGKQRALDLVPKKIHERAPIFLGSYDDVEEIKKLYAAEEQN
			NaFBP1	MLSSTISSLNLPPRTQLSSSNPPFFPQRYNLAPFRNMASSPFSGGLINLRINSPTAVGSKSDSVNSGYYTLIEYMGKEGAADDLVLLFGHLEYASKKIAALVASPFNSSLSKNIVGTETSSSDRDKPKPLDLISNEIILSSLRNSGKVAVMASEEDEGPVWITDDGPFVVVMDPLDGSRNIDASIPTGTIFGIYKRLVEIDHLPVEEKASLNCLQSGAKLVAAAYVLYSSATILCASFGSGTHAFTLDHTTGDFLMTHPNISIPPRGQIYSVNDARYFDWPEGLRQYIDTIRQGKGKHPKKYSARYICSLVADFHRTLLYGGVAMNPRDHLRLVYEANPLSFLAEKAGGRGSDGKNRILSIQPVKLHQRLPLFLGSPEDIEELQSYGDVQQKVNPGYDV
			NaHL	GFCFLNIFLHLGLIQICWNCIKMDNNEKYSEELNVAVRVVHMACALCQKVQKSLLSTTFDDDVKSKDDDSLVTVADWSVQATVSWILSDAFGSENVSVVAEEDVQTLSKSDSAGLLGKVISTVNECLAEASKYGLKSPDEALGPSEVLEAISRCNSSGGPLGRHWVLDPVDGTLGFVRGGQYAVALALIDNGEVVMGVLGCPNYHVKRDRLSNQKQNHIASDISMHSSDVLEVGCVMYTRKGTGEAWVQPLVYGDRKFEWPNFAKQIHVSSIDDPALATFCEPVERANSNHSYTAGLACSVGLRNKPLRVYSMVKYAAIAQGDAEIFMKFARAGYKEKIWDHAAGVLLVQEAGGVVTDAGGRSLDFSRGIYLEGLDRGIVVCSGVKLHEKLIGAVYASW…
			NaHL-1	MSFTCTTTSFPIKVPHTLFHSRKFNDVFPKTQILGTLSFSSKKNSHLGFKDKLSLAQCSKTSFLSEMDEDCKFEVSSIDIPDGYCKELEIAVRAVHMACLLCQRVQDNLLSKSFEQVHSKEDNSPVTIADWSVQAIVSWVLSEAFGSENVSIVAEEDVEVLSKASAVGLLEAVVRTVNECLADAPRFGLKGPGTDLDAKAVLAAISRCNLAGARGSKFWVLDPVDGTLGFVRGDQYAIALALIEDGEPVLGVLGCPNYPMKKEWLGYQNGYRRILSRLTSQTSVSGDKGSVLYARKGGGKAWMQPLLYGEKNFVWPNSAKQIKVSSIDNPALATFCEPVEKANSSHSFTAGLAHSVGLRNQPLRVYSMVKYAAIARGDAEIFMKFASAGYKEKIWDHAA…
			NaIMPL1	MGRCLLSSTVSTFLPCNLPKLAFPKSFSTNSAFFHRGFRTTGAKTRGAFCTKAALSNVYSKIGADSTGSIPSNELLQVVEAAAKTGAQVVMDAVNKPRNVTYKGLTDLVTDTDKSSEVAILEVVRKNFPDHLILGEEGGIIGDSSSDYLWCIDPLDGTTNFAHGYPSFAVSVGVLFRGKPAAATVVEFVGGPMCWNTRIFSAAAGKGAFANGEKIHVSGTDKVEQSLLVTGFGYDHDDPWATNMELFKDFTDVSRGVRRLGAAAVDMCHVALGIAEAYWEYRLKPWDMAAGVLIVEEAGGTVSCMDGGKFSVFDRSVLVSNGLLHAKLLEKIGPATENLKGKGIDFSMWFKPENYHSEV
			NaIMPL2	MQLQMLSQSHFLSLNPRTSLPLSSSISVVNSRRIVSDSLAFPHSDTNSFAISRGVKLSLPTMTSNCVLANNAHIADLGIEDSELDKFAAVGNKMADAAGEVIRKYFRKSFDILDKEDSSPVTIADQAAEESMVKIIQENFPSHAIYGEEKGWRCKEEIAEYVWVLDPIDGTKSFITGKPLFGTLIALLYKGKPILGIIDQPVLKERWTGLSGRRTSLNGQEISTRSCSSLSKAYLYTTSPHLFEGDAELAFARVRSKVKVPLYGCDCYAYALLASGFVDLVIEFGLKPYDILSLIPVIEGAGGIITDWKGQQLTWEASAGSPATSFNVVAAGDKQVHQQAVDALQWQ
			NaIMPL3	MDLLRYSASRFPAAHPQHPFHTPLRRRFVAVRSSLSLPFPEQKAKYYRELEAAVDVVERACCLCVDVKKSLFSSDGRILEKIDQTPVTIADFGVQALVSLEMNRLFPSIPLVAEEDSAFLRSNNLVGSVVDVVKDKATSGDEVTDDNILKAIDRGGKDACVFGPKPATYWILDPIDGTRGFVKGSDALYVVGLALVVEGQIVLGVMGCPNWCEDCSENSIVGVQENSSSRSGIIMVSHVGCGTWTKRFSDILNTESPHTWTRCSVDSCQMVEGARFTIPESQSWKSLPLSVLFDAKRDSENIGDGNILLLSACCGSLCKYLMVASGRASVYIQGRKATSIIKVWDHAVGIICVHEAGGKVTDWAGGSLDIAADETERRIIFPSGGVLVTNGSLHSKIIG…
			NaIMPL3-1	MDLLRCSAVRLPNARLRRSPLRPCFAAVRSSLSLPFPEQKAKYYRELEAAVDVVERACRLCIDVKSSLFSNDDRILEKNDQTPVTIADFGVQALVSLEMNRLFPSIPLVAEEDSSFLRSTNLVGSVVDVVVNKATLRDEVTEDSVLKAIDRGGKDACTFGPKPATYWVLDPIDGTRGFVKGVEALYVVALALVVEGQIVLGVMGCPNWDEDYFVNRATGVQETGSNFSRSGMIMVSHLGCGTWKQRLSDMLTIKLPQSWTRCYVDGCQVLKEARFCTPESQKWESLPLSSSFNAKTNSDEIGKGDILLVPACCGSLCKYMMVASGRASVFLLRATTRKVMKKISGYAPAWDHAVGIICVHEAGGKVTDWEGSSIDFAADQIARRTIFPSGGFLVTNHSL…
			NaSBPASE	MIFFLLSILKILNLIIIMETSVTCCARTAALLPNVSSQHSTTLAAPRSIFPSFSSRSLKSSSIFGESLRVAPKSSIKVSRTKNSSLVTKCEIGDSLEEFLTKSTSDKGLIRLMMCMGEAIRTIAFKVRTASCGGTACVNSFGDEQLAVDMLADKLLFEALGYSHFCKYACSEEVPELQDMGGPVEGGFSVAFDPLDGSSIVDTNFTVGTIFGVWPGDKLTGITGRDQVAAAMGIYGPRTTYVLALKDVPGTHEFLLLDEGKWQHVKDTTEIGEGKMFSPGNLRATFDNPDYAKLIDYYVKEKYTLRYTGGMVPDVNQIIVKEKGIFTNVISPTTKAKLRLLFEVAPLGFLIEKAGGYSSDGNQSVLDRVVVNLDDRTQVAYGSKNEIIRFEETLYGSSR…
			NaSBPASE1-1	METSVTCCARASLLPNVSSQQYSTTALAAPRSISPSFSIRSLKSSSFFGESLHVAPKSSLNVSKTKRYSLMTKCEIGDSLEEFLTKSTSDKGLISLMLCMGEALRTIAFKVRTASCGGTACVNSFGDEQLAVDMLANKILFDALTYSHVCKYACSEEVPELQDMGGPAEGGFSVAFDPLDGSSIVDTNFTVGTIFGVWPGDKLTGITGRDQVAAAMGIFGPRTTYVLALKDVPGTHEFLLLDEGKWQHVKDTTEIGEGKMFSPGNLRATFDNADYAKLIDYYVKEKYTLRYTGGMVPDVNQIIVKEKGIFTNVTSPTAKAKLRLLFEVAPLGFLIEKAGGYSSDGKQSVLDKVIGTLDERTQVAYGSKNEIIRFEETLYGSSRLKAAEPVGAAV
			NaVTC4	KILKMAQHGSLEEFLAVAVDAAKRAGEIIRKGFYETKIVVHKGQVDLVTETDKACEDSHIQSSQATFSKSQGEETTAACGDFELTDEPTWIVDPVDGTTNFVHGFPSVCVSIGLTIGKIPTVGVVYDPIIDELFTGIHGKGAFLNGKPIKVSSKSELVKSLLGTEVGTTRDNLTVEATTKRINNLLFKVRSLRMCGSCALDLCWVACGRLDLFYLTGFGGPWDVAGGAVIVKEAGGVLFDPSGSDFDITAQRVAATNPHLKDAFIEALQQSVWVSLEMNEAPV
			NaVTC4-1	MAQDGSLEQFLDVAVEAAKKAGDVIRQGFHQTKNVEHKGVVDLVTETDKACEDLIFNHLKQQFPSHKFIGEETTAACGNFELTDEPTWIVDPLDGTTNFVHGFPFVCVSIGLTIGKVPTVGVVYNPIIDELFTAIIGKGAFLNGKPIKVSSQSELVKALLATEAGTKRDKLTLDATTGRINSLLFKVRSLRMCGSCALNLCGVACGRLDLFYELEFGGPWDVAGGAVIVKEAGGFVFDPSGLEFDLTARRVAATNAHLKDAFIKALNESE
	Glycine max	25	GmCFBP1	MVAMAAATASTQLIFSKPCSPSRLCPFQLCVFDTKQVLSSGRRRHVGGSGVRCMAVGEAATTGTKKRSGYELQTLTSWLLKQEQAGVIDAELTIVLSSISMACKQIASLVQRANISNLTGVQGAVNVQGEDQKKLDVVSNEVFSNCLRSSGRTGIIASEEEDVPVAVEESYSGNYIVVFDPLDGSSNIDAAVSTGSIFGIYSPNDECLADIDDDPTLDTTEQRCIVNVCQPGSNLLAAGYCMYSSSIIFVLTLGNGVFVFTLDPMYGEFVLTQENLQIPRAGKIYAFNEGNYQLWDEKLKKYIDDLKDPGPSGKPYSARYIGSLVGDFHRTLLYGGIYGYPRDKKSKNGKLRLLYECAPMSFIVEQAGGKGSDGHQRILDIQPTEIHQRVPLYIGSVEE…
			GmCFBP1-1	MVAMAAATASSQLIFSKPRSPSRLCPFQLCVFDTKQVLSSSSGRRRHVGGSGVRCMAVGEAATTETKKRSGYELQTLTNWLLKQEQAGVIDAELTIVLSSISMACKQIASLVQRANISNLTGVQGAVNVQGEDQKKLDVVSNEVFSNCLRSSGRTGIIASEEEDVPVAVEESYSGNYIVVFDPLDGSSNIDAAVSTGSIFGIYSPNDECLADIGDDPTLDTTEQRCVVNVCQPGSNLLAAGYCMYSSSIIFVLTLGNGVFVFTLDPMYGEFVLTQENLQIPRAGKIYAFNEGNYQLWDDKLKKYIDDLKDPGPSGKPYSARYIGSLVGDFHRTLLYGGIYGYPRDKKSKNGKLRLLYECAPMSFIVEQAGGKGSDGHQRILDIQPTEIHQRVPLYIGSV…
			GmCYFBP	MDHSADAQRTDLMTITRFVLNEQSKHPESRGDFSILLSHIVLGCKFVCSAVNKAGLAKLIGLAGETNVQGEEQKKLDVLSNDVFIKALISSGRTCILVSEEDEEATFVEPSKRGKYCVVFDPLDGSSNIDCGVSIGTIFGIYLIKEDHEPTVEDVLQPGKNMLAAGYCMYGSSCTLVLSTGSGVNGFTLDPSLGEFILTHPDIKIPKKGKIYSVNEGNAKNWDGPTTMYVENCKYPKDGSSPKSLRYIGSMVADVHRTLLYGGIFLYPADKKSPNGKLRVLYEVFPMSFLMEQAGGQAFTGNQRALDLVPKKLHERSPIFLGSYEDVEEIKALYSADEK
			GmCYFBP1-1	MDHSADAQRTDLMTITRFVLNQQSNHPESRGDFSILLSHIVLGCKFLCSAVNKAGLAKLIGLAGETNVQGEEQKKLDVLSNDVFIKALVSSGRTCILVSEEDEEATFVEASKRGKYCVVFDPLDGSSNIDCGVSIGTIFGIYLIKEDHEPTIEDVLQPGKNMLAAGYCMYGSSCTLVLSTGSGVNGFTLDPSLGEFILTHPDIKIPKKGKIYSVNEGNAKNWDDPTTKYVENCKYPRDGSSPKSLRYIGSMVADVHRTLLYGGIFLYPADKKSPNGKLRVLYEVFPMSFLMEQAGGQAFTGNQRALDLVPKKLHERSPIFLGSYEDVEEIKALYAAEE
			GmCYFBP1-2	MDHSADAHRTDLMTITRFVLNEQSKHPESRGDFTILLSHIVLGCKFVCSAVSKAGLAKLIGLAGETNVQGEEQKKLDVLSNEVFIKALISSGRTCILVSEEDEEAIIVEPSKRGKYCVCFDPLDGSSNIDCGVSIGTIFGVYALKDVHEPTIEDVLLPGKNMVAAGYCMYGSSCTLVLSTGAGVNGFTLDPSLGEFILTHPNIKIPKKGKIYSVNEGNAKNWDRPTATYVEKCKFPEDGSSPKSLRYIGSMVADVHRTLLYGGIFLYPADKKSPNGKLRVLYEVFPMSFLMEQAGGQSFTGKERALDLVPTKLHERSPIFLGSYDDVEEIKALYAAAEGEQE
			GmCYFBP1-3	MDHQADTNRTDLMTITRFVLNEQSKYPESRGDFTILLSHIVLGCKFVCSAVNKAGLAKLIGLAGETNVQGEEQKKLDVLSNEVFVKALISSGRTCLLVSEEVEEAIFVPSSHRGKYIVVFDPLDGSSNIDCGVSIGTIFGIYMVKNEAEVSLEDALQPGNQMLAAGYCMYGSSCTFVLSTENGVNGFTLDPSLGEFILTHPNIKIPSKGKIYSVNEGNARNWDEPTTKYVQMCKFPQDGSPPKSLRYIGSMVADIHRTLLYGGIFMYPADAKSPNGKLRLLYEVFPMSYLMEQAGGQAFTGKQRALDLIPKKIHERSPVFLGSYDDIEQMKELYAASKEDDA
			GmFBP1	MQAAATTPLYQLVSFKPKLQTFPSKSQLCPLGTPFCRLGMASVSGFRLRPLRAVGGSSSSSASGDDGFVTLIEYVAKEGMNVKDDLVVLLDHIQYACKRIAALVASPFNYSLGKQTGHGSVGSDRDAPKPLDIVSNEIILSSLRKSRKVAVMASEENDAPTWISDDGPYVVVTDPLDGSRNIDASIPTGTIFGIYKRLEELDNLPTEEKAMLNSLQSGSKLIAAAYVLYSSATILCITFGSGTQAFTLDHSTGDFILTNPSIKIPPRGQIYSVNDARYFDWPEGLRQYIDTVRQGKGRYPKKYSARYICSLVADLHRTLLYGGVTMNPRDHLRLVYEANPLSFIVEQAGGRGSDGKNRILSLQPVKLHQRLPLFLGSLEDMEELESYGDIQQKVNPGYEV
			GmFBP1-1	MQSTAAPPLYQLVSFKPKLQTFPSKSQLCPLGTPFCRLEMASISGFGLKPLRAVSVSSSSSASSDDGFVTLTEYVGKEGMNVKDDLVVLLDHIQYACKKIAALVASPFNYSLGKQTALGSVGSDRDAPKPLDIVSNEIILSSLRKSGRVAVMASEENDAPTWISDDGPYVVVTDPLDGSRNIDASIPTGTIFGIYKRLEELDDLPTEDKAMLNSLQSGSRLIAAAYVLYSSATILCITFGSGTQAFTLDHSTGDFILTNPSIKIPPRGQIYSVNDARYFDWPEGLRQYIDTVRQGKGRYPKKYSARYICSLVADLHRTLLYGGVAMNPRDHLRLVYEANPLSFIVEQAGGRGSDGKNRILSLQPVKLHQRLPLFLGSLEDMEELESYGDIQQKVNPGYEV
			GmHL	MEEDKYAKELEVAVRVVHVACALCGRVQERLLATTNDHVLAKDDDSPVTVADFSVQATISWLLSEIFGVQNVSIIAEEDIQTISKDESASLLEAVVNTVNESLAFASKYGFQSPETTLGTSEVLEAIARCNSTGGSRGRYWVLDPVDGTLGFVRGDQYAIALALIEDGKVVLGVLGCPNYPVKTEWLSYHYQHHQTAPESSLTTPDTGGKGCVLYARKGSGEAWLQSLIDGDNMLEWSNCARLIRVSSIEDPALATLCEPVERANSNHSFTAGLAHSVGLRKQPLRVHSMVKYAAIARGDAEIFMKFAKCGYKEKIWDHAAGVVIVEEAGGVVTDAGGRPLDFSKGMYLEGLDRGIIACSGVTLHEKLIDAVYASWDSSNL
			GmHL-1	MEKEEDKYAKELEVAVRVVHVACALCGRVQERLLATTNDHVVAKDDDSPVTVADFSVQATISWLLSEILGVQNVSIVAEEDIETISKDESASLLEAVVNTVNESLAFASKYGLQCPETTLGTPEVLEAIARCNSTGGPRGRYWVLDPVDGTLGFVRGDQYAVALALIEDGKVVLGVLGCPNYPVKIEWLNYHYQHHQTMPESSLKTPDTGGKGCVLYARKGSGEAWLQSLIDGDNMLEWPNCARLIRVSSIDDPALATLCEPVERANSNHSFTAGLAHSVGLRKQPLRVHSMVKYAAIARGDAEIFMKFAKCGYKEKIWDHAAGVVIVEEAGGVVTDAGGRPLDFSKGMYLEGLDRGIIACSGVALHEKLIDAVYASWDSSNL
			GmHL-2	MSSYFPSFATKIPRMGKGYDDVLFTVTNQLVKSGSWSNNYKVPCNLSKQHIGFVSKFDQICSSPVMEDEHKKLDSLPEIELSESEEYSKELEVAVRAVQMACSLCQRVQDTLISNAGTNHRQVQSKDDNSPVTVADWSVQAIVSWMLSECLGSQNVSIVAEEDVQTLSKANASELLEAVVETVNQCLAEAPRFGVQEPKSALRTSDVLEIISRCNSTGGPTGRFWVLDPVDGTLGFVRGDQYAVALALIEDGEVKLGVLGCPNYPMRKEWLSYHHRYHRIISKLTPPTSETWNKGCVLYAKKGSGKAWMQPLLHVNKMFVWPNHAKQVSVSSIDNPALATFCEPVEKANSSHSFTAGLAHSVGLRKQPLRVYSMVKYAAIARGDAEVFMKFARAGYKEK…
			GmHL-3	MSSYFPSFGTKIPRMGKGYDDVLFTVINQLVKPGSWSNYKVPCNLSKQHISFVSKFDQICSSPVMMEDEHKKLDSLPEFGLSEPEKYSKELEVAVRAVQMACSLCQRVQDTLISNARTNHRQVQSKDDNSPVTVADWSVQAIVSWMLSECLGSQNVSIVAEEDAQTLSEANASELLEAVVETVNQCLAEAPRFGVQEPKSPLGTSDVLEIISRCNSTGGPTGRFWVLDPVDGTLGFVRGDQYAVALALIEDGEVKLGVLGCPNYPMRKEWLSYHHRYHRIISKLTRPASETWNKGCVLYAKKGSEKAWMQPLLHVNKMFVWPNHAKQVSVSSIDNPALATFCEPVEKANSSHSFTAGLAHSVGLRKQPLRVYSMVKYAAIARGDAEVFMKFARAGYKEK…
			GmHL-4	MPLYCSTLGAKIPSILGFVRRSENCTHSHIETANSCFMSLHNKSLNTLPSHIAFVSKFDQSFSSPMMEEDHKMFGLTSEQEEYCKELDAAVRAVQVACFLCQKLQDSLISKSRSNNNLNSPLTVAGWSVKAIVSRILFECLENENVSIVTEKEVQTLSSTDASELLEAVVKIVNECLAEVPRFGFEEPKSALGTSEVLEIISRCNGGPSGRFWTLSPLDGGGSSCGDQHVVALSLIEDGEVVVGVLGCPNYPMRKDWFSYDHSYLRMISKLTPPTSQTWNKGCIIYAKRGSGKAWIQPLLHVNNKSVWPNHAKQVSVSSIDNLAMATFCQPVEKANSSHSFTEGLAHSVGLSNQPVRVYNMMKYAAIACGDAEVFMKFARAGYKEKIWDHAAGAIIIRE…
			GmHL-5	MPLYCSTLGASFPRILGLGKRSENYTHSHIKTPSHFGSCFLSLNNKSPNTLPNHIAFVSKLDQSFSSPVMEEEDHKMFGLVSEPEEYCKELGVAVRAVQMACFLCQKLQDTLISKSRSNNNLNSPLTVAGWSVKAIVSWILFECLGNENVSIVTEKEVRTLSSTNASELLEAVVKTVNECLAEAPRFGVEEPKSTLGTSEVLEIISRCNSVGDPSGRFWALSPLDGGSSCGDQHVVALSLIEEGEVVLGVLGCPNYPMRKDWFSYHHSYLRMISKLAPPTSQTWNKGCVIYAKRGSGKAWIQPLLHVNDKFVWPNHAKQVSVSSIDNLEMATFCQPVEKANLSHSFAEGLAHSVGFSNQPLRVYNTMKYTAIACGDAEVFIKFARAGYKEKIWDHAAGA…
			GmIMPL1	MSIVFSAAATLSPRSRLLFPPLSFSHTYPTKFHRNGWHPSLSKSRTQPLITNSLLSDKFPTVGSLSTGPIPSTHLIEVVKTAAQTGAQVVMEAVNKPRNITYKGLTDLVTETDKMSEAAILEVVKKNFEDHLILGEEGGVIGDAASDYLWCIDPLDGTTNFAHGYPSFAVSVGVLYRGNPAAAAVVEFVGGSMCWNTRLFSATAGGGAFCNGQRIQVSATNQVERSLLVTGFGYDHDDAWATNIDLFKEFTDVSRGVRRLGAAAVDMCHVALGIVEAYWEYRLKPWDMAAGVLMVEEAGGTVSRMDGGKFCVFDRSVLVSNGQLHAKLLERIGPATEKLKNKGIDFSLWYKPENYRADV
			GmIMPL2	MFSQCHFLSHSPIPNTTFRLRAMAPHSTPLELNRFAEVGNKVADAAGEVIRKYFRKNFDVIHKHDLSPVTIADQSAEEAMVSIILDNFPSHAIYGEENGWRCEEKNADYVWVLDPIDGTKSFITGKPVFGTLVALLQNGTPILGIIDQPVLRERWIGIAGKRTSLNGQEISTRTCADLSQAYLYTTSPHLFSGDAEEAFIRVRSKVKIPLYGCDCYAYALLSSGFVDLVVESGLKPYDFLALIPVIEGAGGVITDWKGDKLFWEASPLSIATTLSYLHVAGFNVVAAGDKQIHQQALDSLQWK
			GmIMPL2-1	MAPHSSPLELNHFAEVGNKVADAAGEIIRKYFRKNFDVIHKHDLSPVTIADQSAEEAMVSIILDSFPSHAIYGEENGWRCKEKNTDYVWVLDPIDGTKSFITGKPVFGSLVALLQNGTPILGIIDQPVLRERWIGITGKRTTLNGQEISTRTCADLSQAYLYTTSPHLFSGDAEKAFIRVRSKVKIPLYGCDCYAYALLSSGFVDLVVESGLKPYDFLALIPVIEGAGGVITDWKGDKLFWEVSPLSIPTSGFNVVAAGDKQIHQQALDSLQWK
			GmIMPL3	MAMDILRSPVSAVRLFNGGATRSRRFNVRATLPFPQQNAKHYKELQAAIDVVQRACRLCLNVKSSLFSTDGKVLEKNDQTPVTVADFGVQALISFELNKLFPSIPLVAEEDSAFLRTRNLAGTVLDAVTDTASSTCKPLTQDDVLEAIDRGGKDAFVFGSKPATYWVLDPIDGTRGFLKAGKALYVVGLALVVEGEIVIGVMGCPNWKEDLSEKSSVEIEEGWDSLGGSGTVMIAHKGCGTWMKSLNSQLKSSGVWTRCFVDGSDIIHKARFCIPDSQTWESLPLTSLFNATSNADNVGSNQILLLGACCGSLCKYLMVASGRASIFILRAKEKTIIKAWDHAVGIICVHEAGGKVTDWKGSDIDLAADHVGRRIIFPSGGVLVANGNLHNKILQIINQ…
			GmSAL1	MGTQTTLWCRARTTISVGGDWKLFESRIRKKGTTVSTSRSRSCFCSSPLTLIVSSMPYEKEFAAAKKAATLAARLCKKVQKALLQSDVHSKSDKSPVTVADYGSQALVSFILERELPSEPFSLVAEEDSGDLRKESGQDTLKRITELVNDTLASEGSNSFSTLTTDDVLAAIDGGKSEGGSVGRHWVLDPIDGTKGFVRGDQYAIALALLDEGKVVLGVLACPNLPLASIGSNQQLSSSNEVGCLFFAKVGDGTYMQALGGSTQTRVHVCDIDNPEEASFFESFEAAHSSHDLSSSIAEKLGVKAPPVRIDSQAKYGALSRGDGAIYLRFPHKGYREKIWDHAAGSIVVTEAGGIAMDAAGNPLDFSKGKFLDVVSGIIVTNQKLKASLLRAVKEALNE…
			GmSAL1-1	MPYEKELAAAKKAVTLAARLCQKVQKALLQSDVHSKSDKSPVTVADYGSQALVSFILERELPSESFSLVAEEDSGDLRKESGQDTLNRITELVNDTLASEGSNSFSTLTTDDVLVAIDSGKSEGGSVGRHWVLDPIDGTKGFVRGDQYAIALALLHEGKIVLGVLACPNLPLASIGSNQQHSSSNEVGCLFFAKVGDGTYMQALGGSTQTRVHVCDIDNPEEASFFESFEAAHSLHDLSSSIAEVKLGVKAPPVRIDSQAKYGALSRGDGAIYLRFPHRGYREKIWDHAAGSIVVTEAGGIAMDAAGNPLDFSKGKFLDVVSGIIVTNQKLMPSLLTAVKEALNEKASSL
			GmSBPASE	METGIACYTRGPFLPSVSSKHSPPSISPSFGLRSLKSSSLFGESLRVASKSTLKVSKTKNTSLVTRCEIGDSLEEFLTKATPDKGLIRLLVSMGEALRTISFKVKTASCGGTQCVNTFGDEQLAVDLLANQLLFEALNYSHFCKYACSEENPELLDMGGPVEGGFSVAFDPLDGSSIVDTNFTVGTIFGVWPGDKLTGITGRDQVAAAMGVLGPRTTYVLALKDFPGTHEFLLLDEGKWQHVKETTEIGEGKLFSPGNLRATSDNPDYAKLIDYYVNEKYTLRYTGGMVPDVNQIIVKEKGIFTNVSSPSAKAKLRLLFEVAPLGFLIEKAGGYSSDGHQSVLDKVISNIDDRTQVAYGSKNEIIRFEETLYGKSRLKGGVAVGAAA
			GmSBPASE1-1	METGIACYTRGPFLPSVSSKHSPPSISPSFGLRSLKSSSLFGESLRVASKSTIKVSKTKNTSLVTRCEIGDSLEEFLTKATPDKGLIRLLVSMGEALRTISFKVKTASCGGTQCVNTFGDEQLAVDLLANQLLFEALNYSHFCKYACSEENPELLDMGGPVEGGFSVAFDPLDGSSIVDTNFTVGTIFGVWPGDKLTGITGRDQVAAAMGVLGPRTTYVLALKDFPGTHEFLLLDEGKWQHVKETTEIGEGKLFSPGNLRATSDNPDYAKLIDYYVNEKYTLRYTGGMVPDVNQIIVKEKGIFTNVTSPSAKAKLRLLFEVAPLGFLIEKAGGYSSDGHQSVLDKVITNIDERTQVAYGSKNEIIRFEETLYGKSRLKDGVAVGAAA
			GmVTC4	MVDNESLSEFLASAVDAAQKAGEIIRKGFYQTKNVEHKGQVDLVTETDKACEELIFNNLKQLYPTHKFIGEETTAAYGTTELTDEPTWIVDPLDGTTNFVHGFPFVCVSIGLTIGKTPTIGVVYNPIINELFTGIRGKGAFLNGNPIKVSSQTELISSLLATEAGTKRDQETVDASTNRIKSLLFKVRSLRMSGSCALNLCGIACGRLDVFFELGFGGPWDVAGGAVIVREAGGVVFDPSGADFDITSQRVAASNSFLKDALVDTLRQMV
			GmVTC4-1	MVDNDSLSEFLASAVDAAQKAGEIIRKGFYQTKNVEHKGQVDLVTETDKACEELIFNHLKQLYPTHKFIGEETTAAYGTTELTDEPTWIVDPLDGTTNFVHGFPFVCVSIGLTIGKTPTIGVVYNPIINELFTGIHGKGAFLNGNPIKVSSQTELISSLLATEAGTKRDKETVDASTDRIKSLLFKVRSLRMSGSCALNLCGIACGRLDVFFELGFGGPWDVAGGAVIVREAGGVVFDPSGADFDITSQRVAASNPFLKDALVDTLRQMV
			GmVTC4-2	MGDNDSLSEFLASAVDAACKAGEIIRKGFYQTKNVQHKGLVDLVTETDQACEDLIFTHLKQLYSTHKFIGEETTAAGGNAELTDEPTWIVDPLDGTTNFVHGFPFVCVSIGLTIGKVPTVGVVYNPIINELFTGIRGKGAFLNGNPIKVSSQTELMSALLVTEVGTKRDKLTIDACTNRINSLLFKVRSLRMTGSCALNLCGIACGRLDVCFELGFGGPWDVAGGAVIVREAGGVIFDPSGADFDITSQRVAASNPFLKDALVDVLHQIV
