# Supplementary material
Source: Research Square preprint supplement (doi:10.21203/rs.3.rs-9570638/v1)

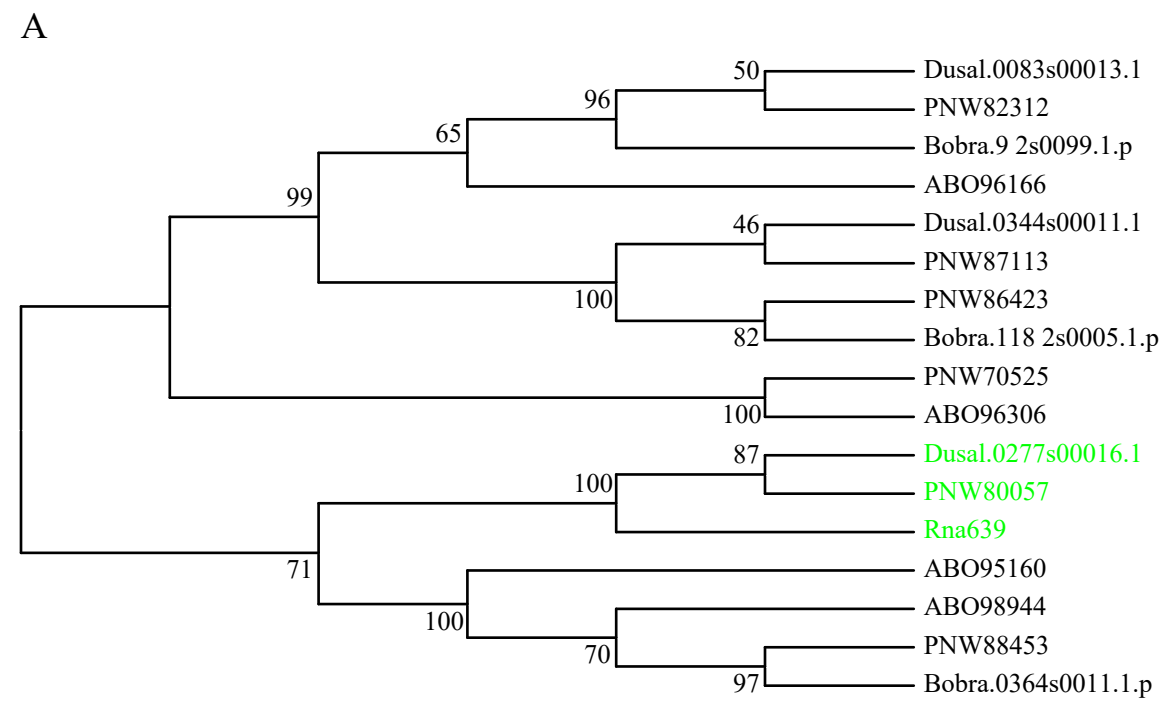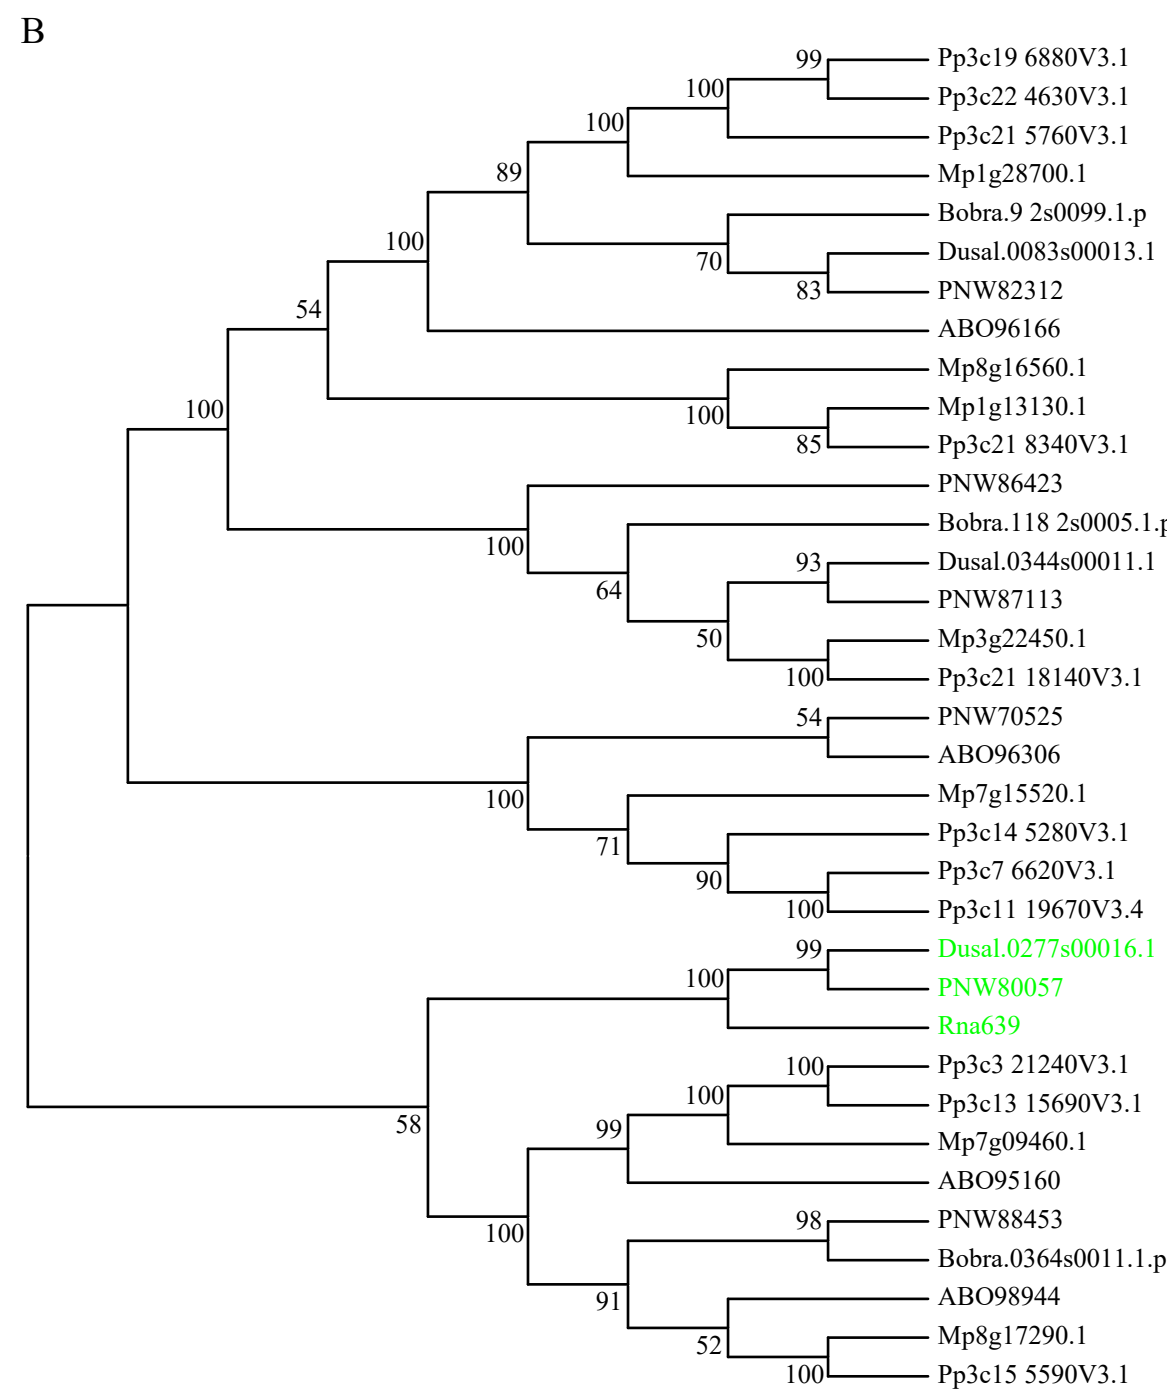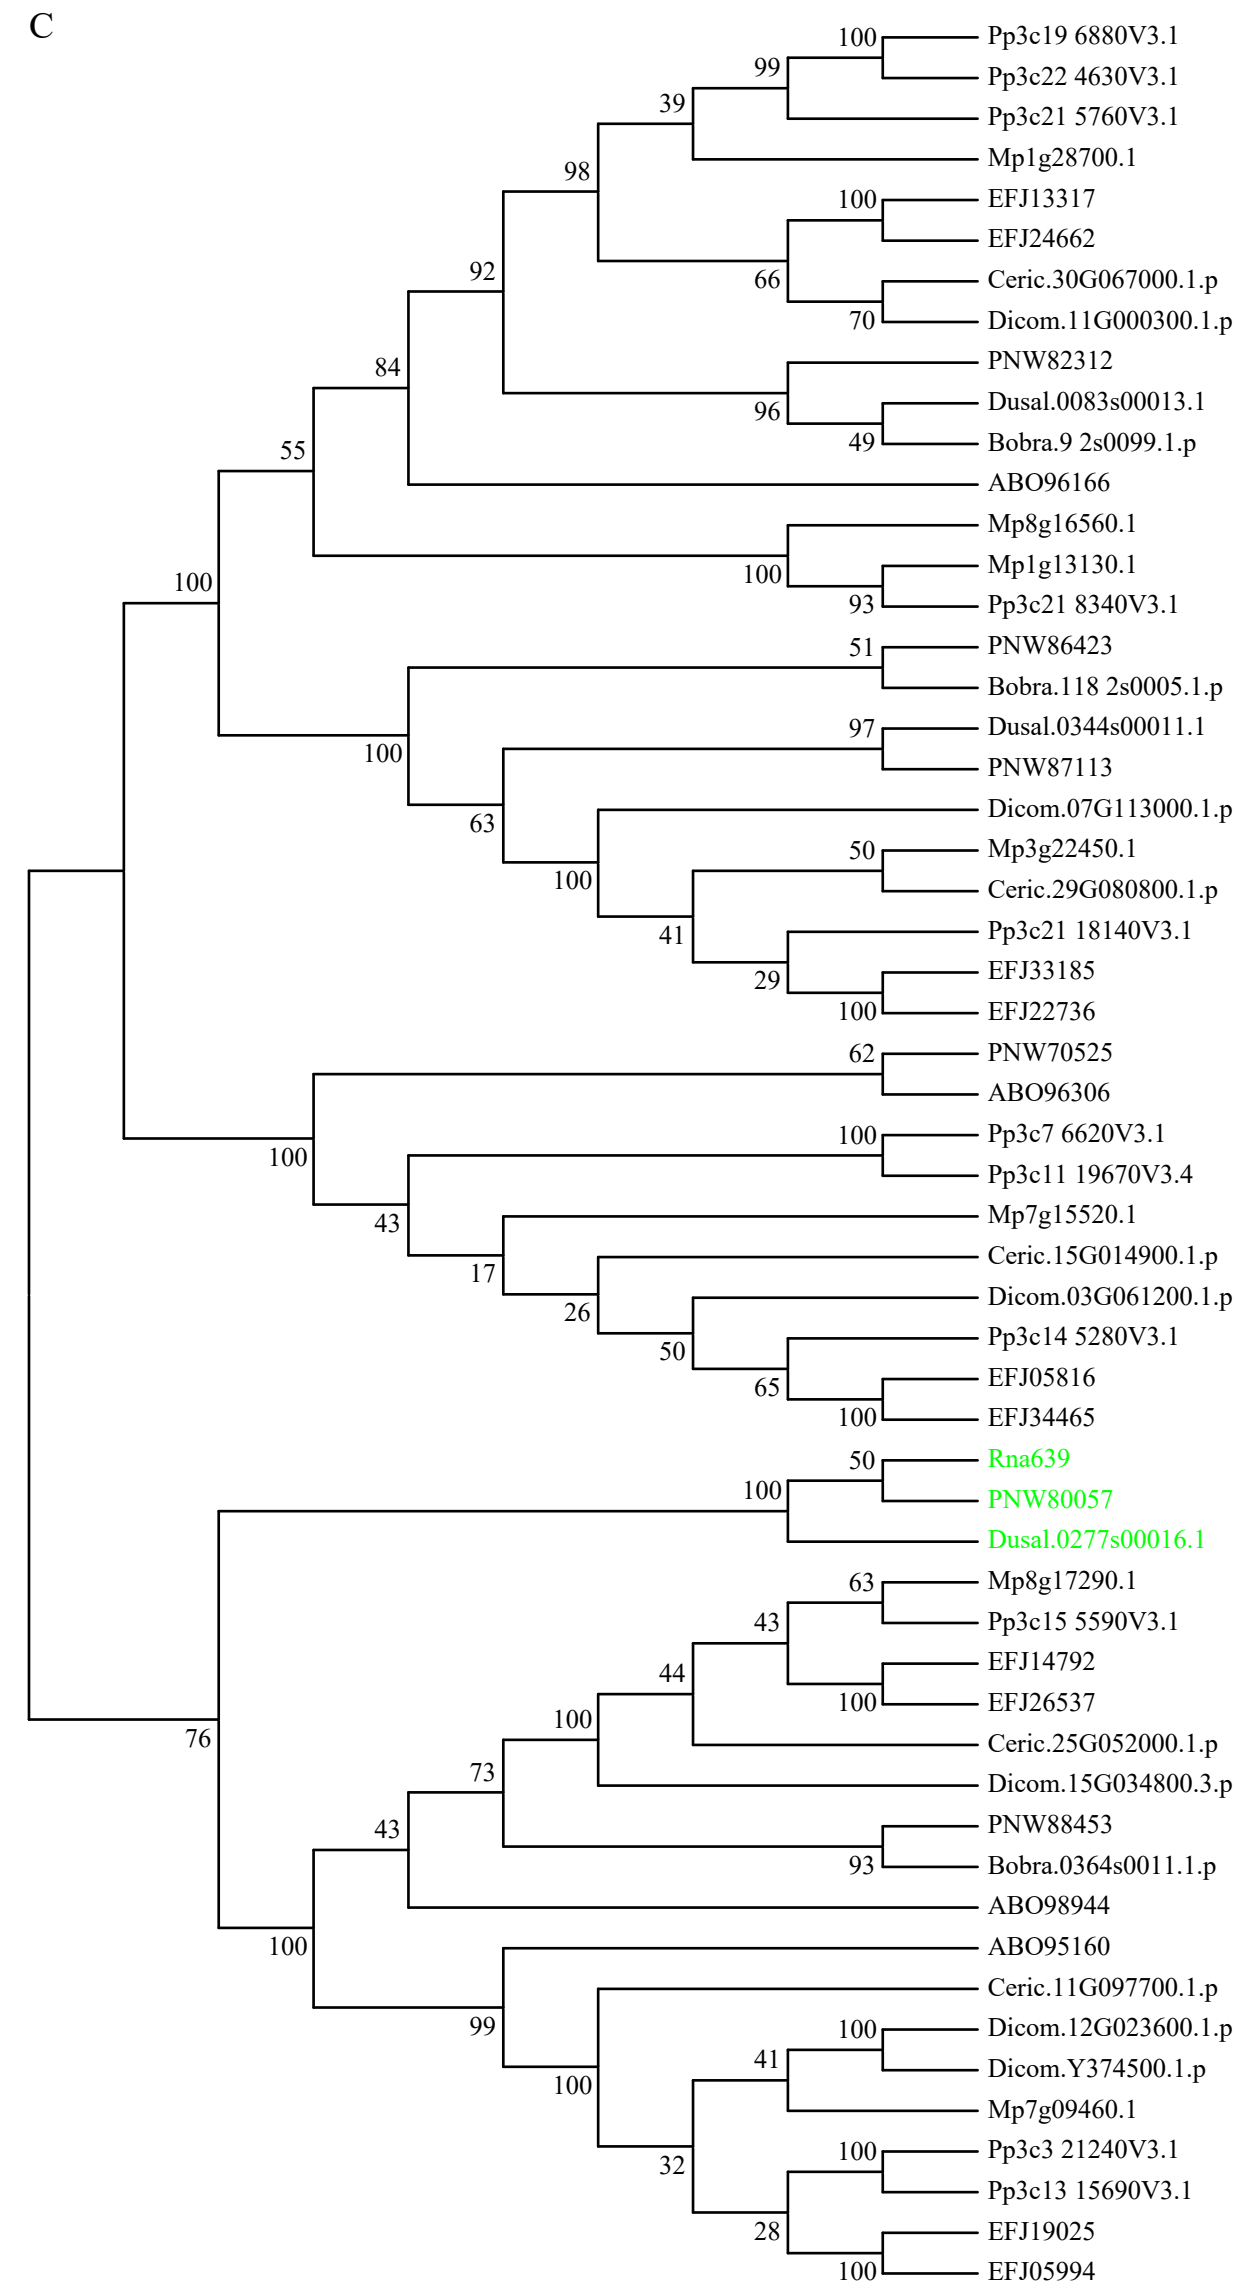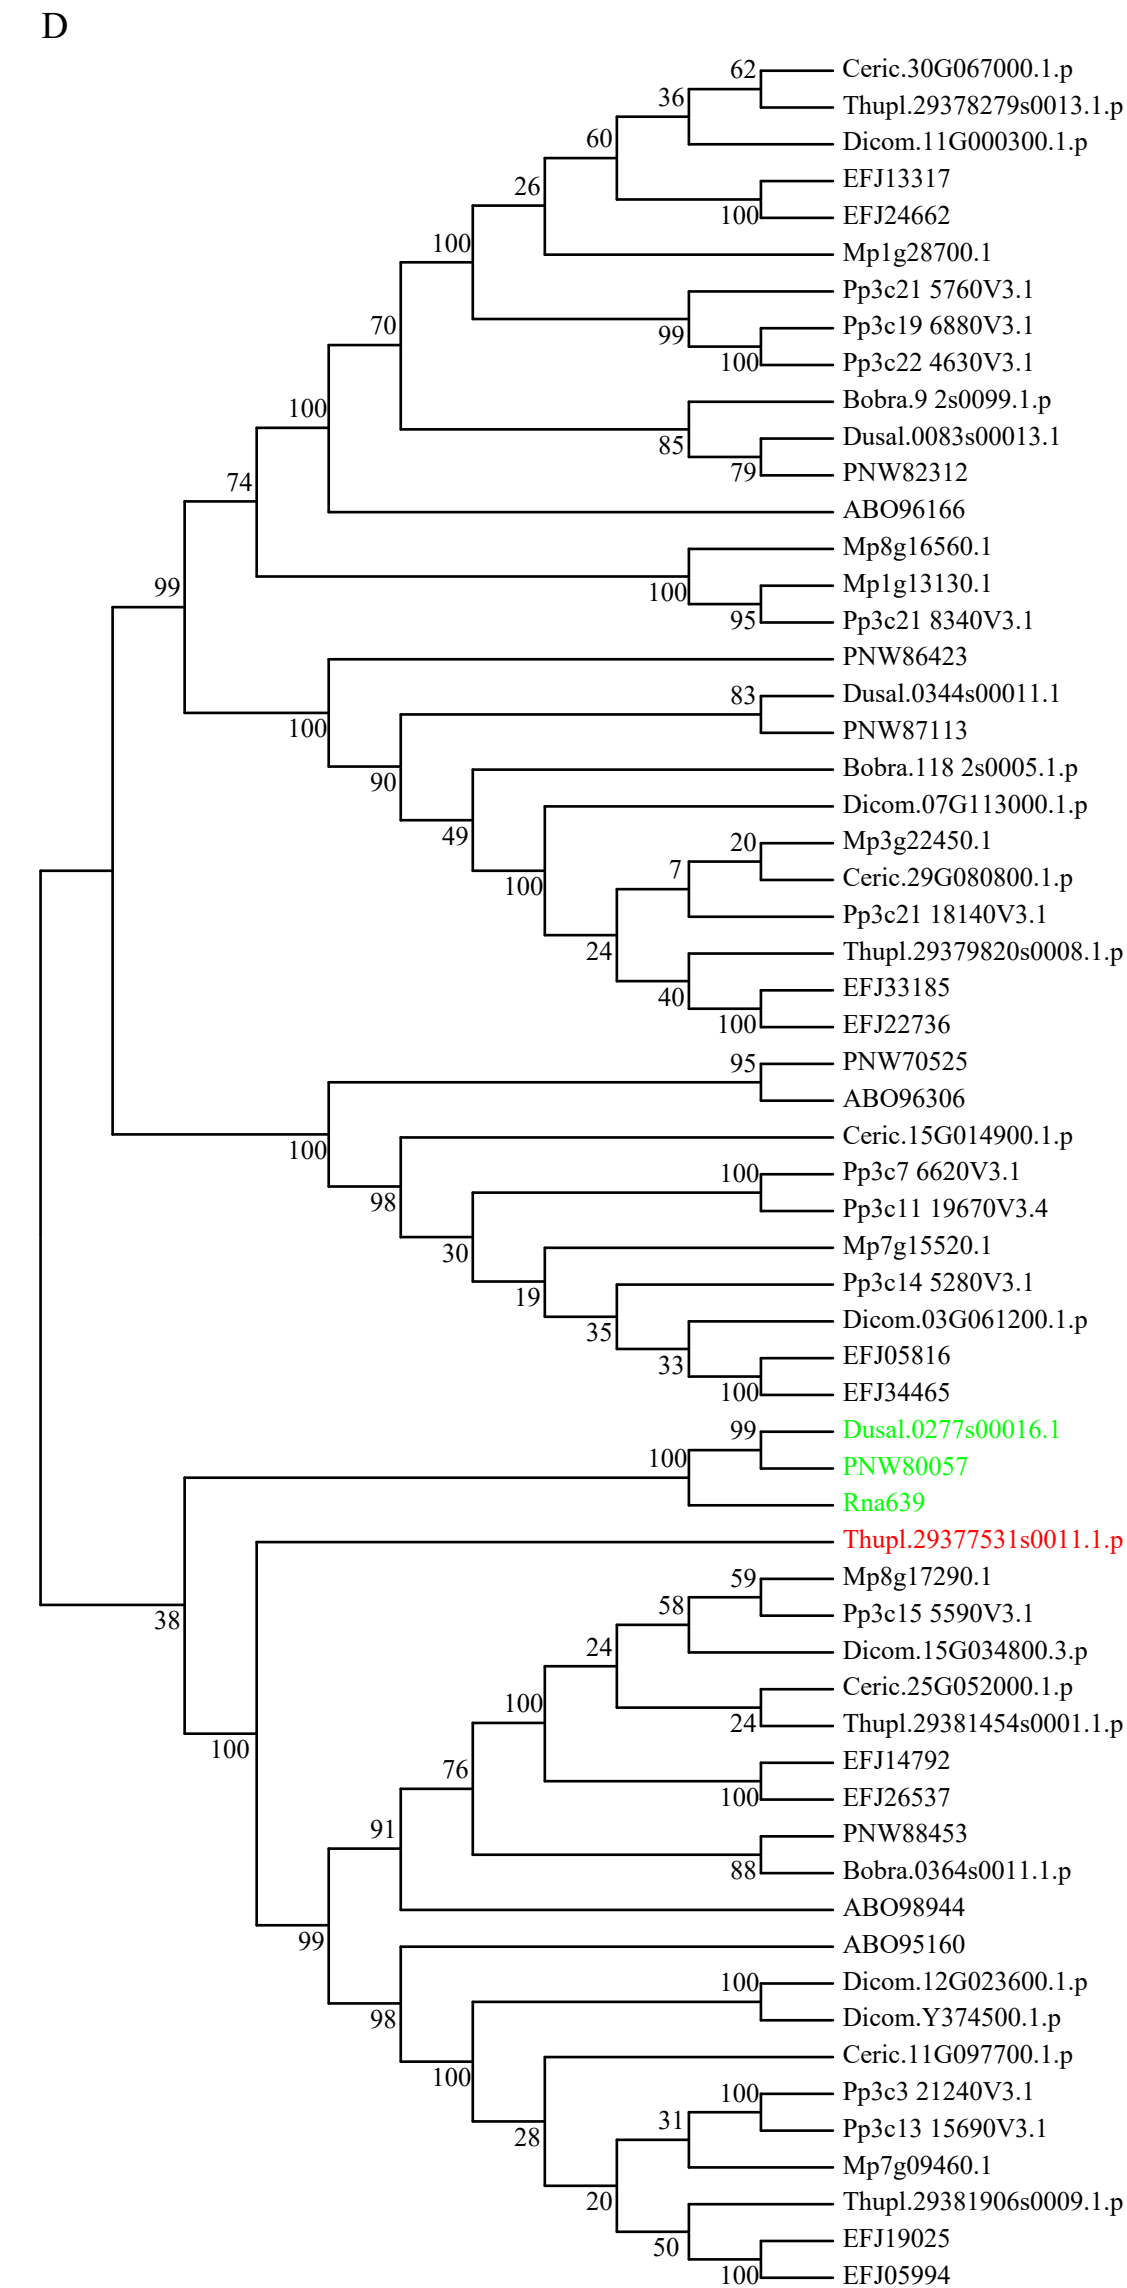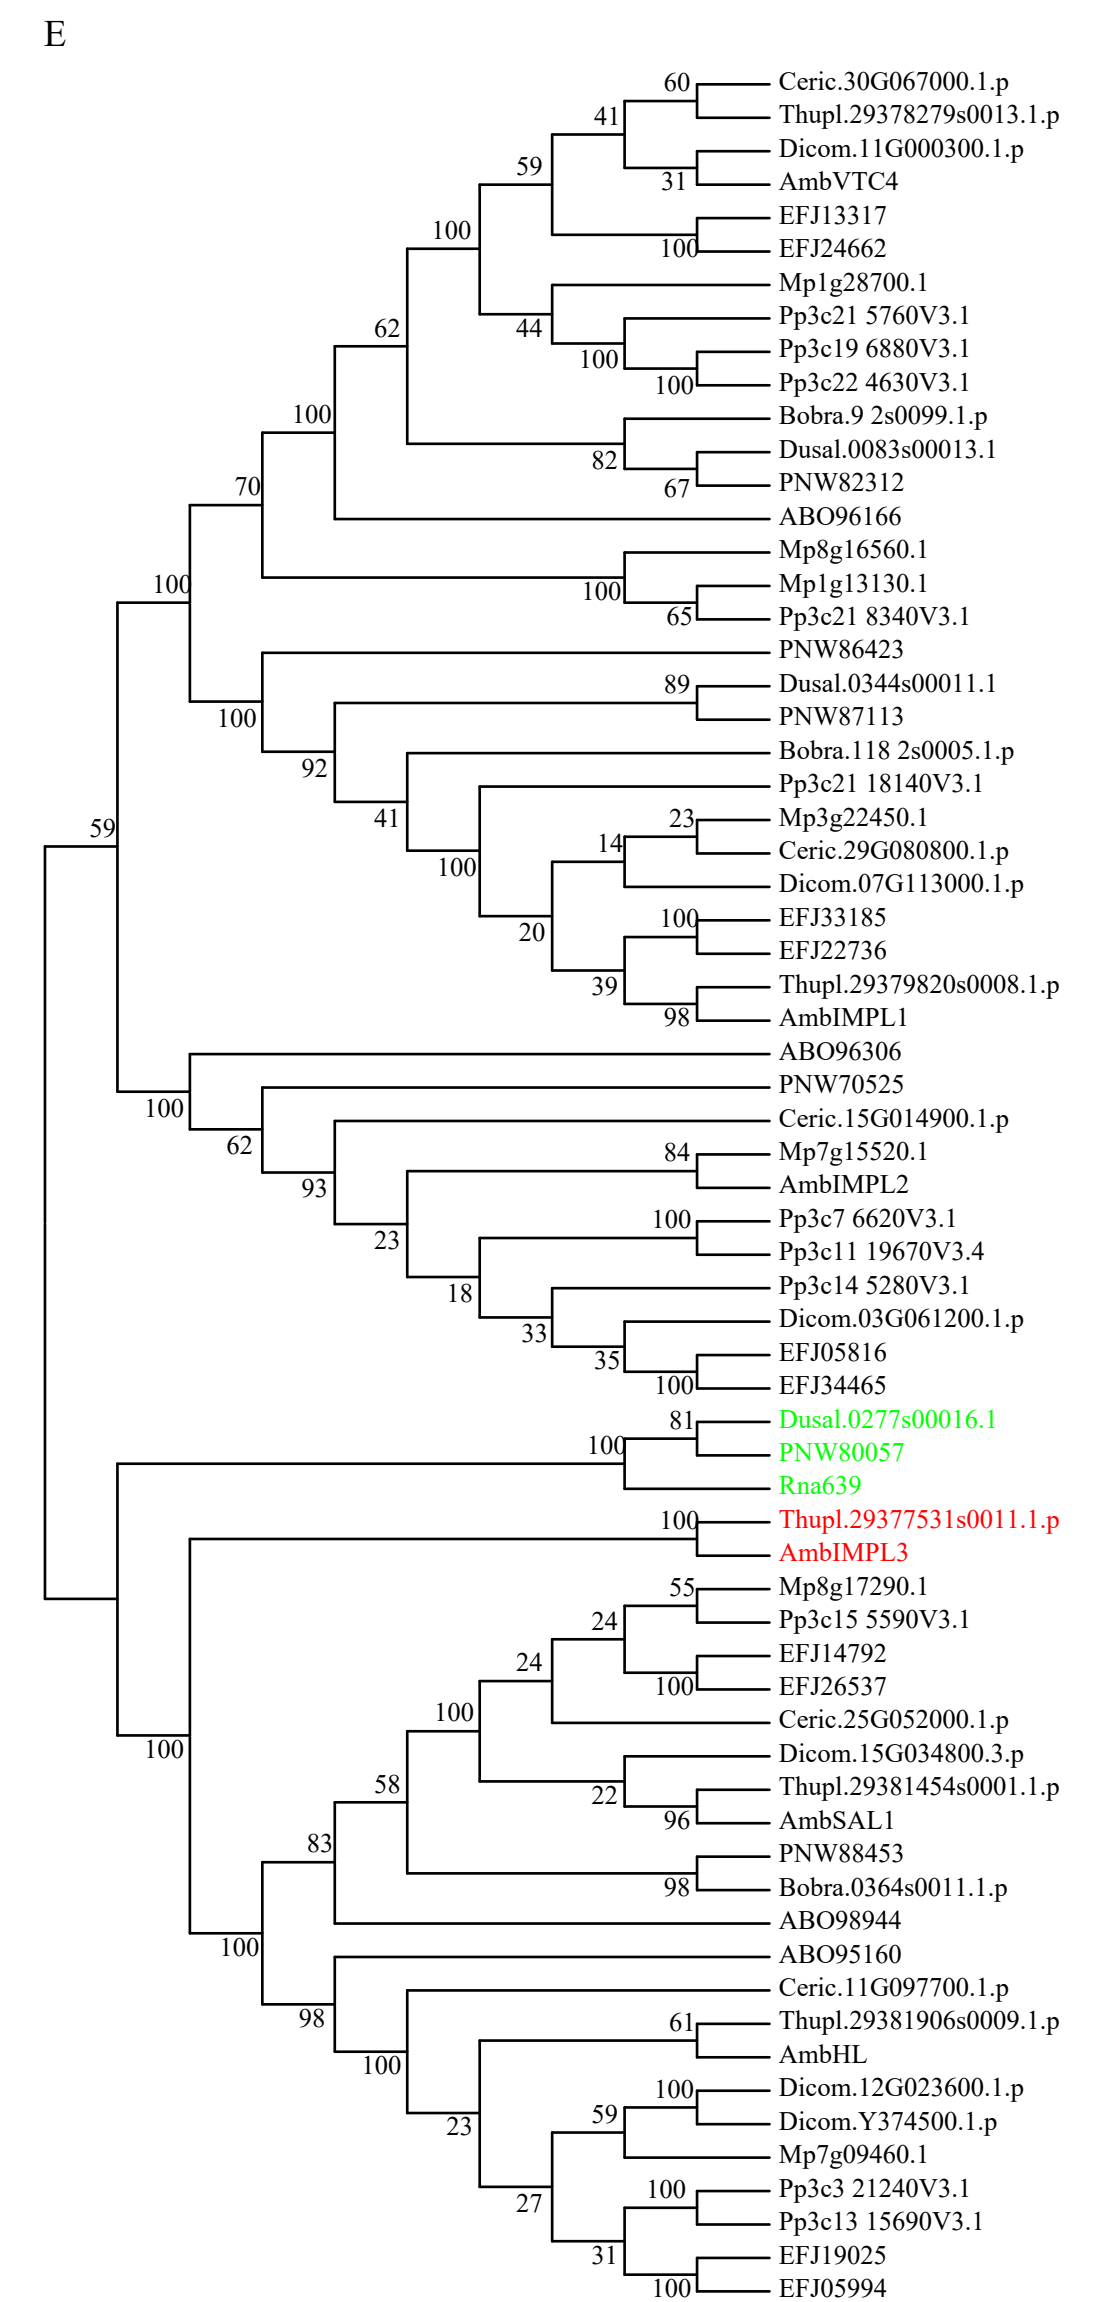

Supplement: Supplementary file 1 [file 41f28953cbbba2755c17daff.pdf]

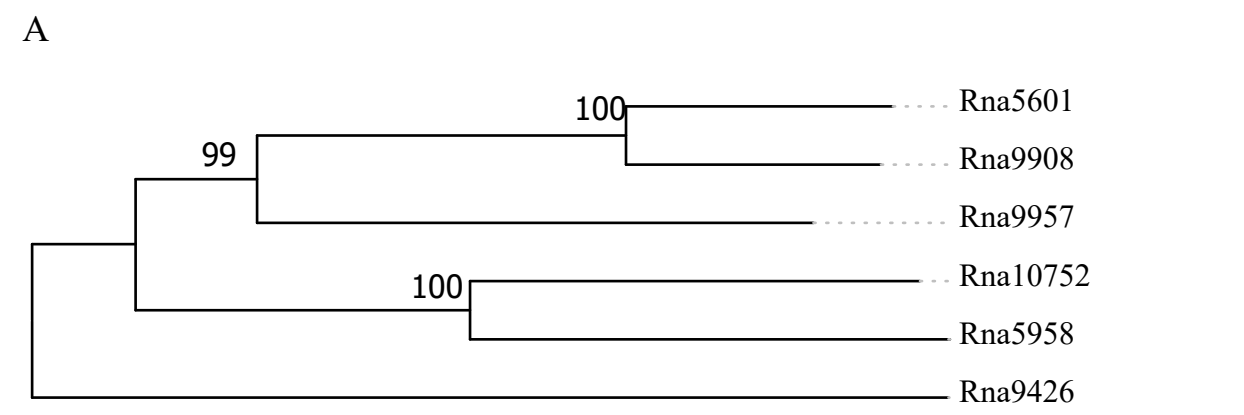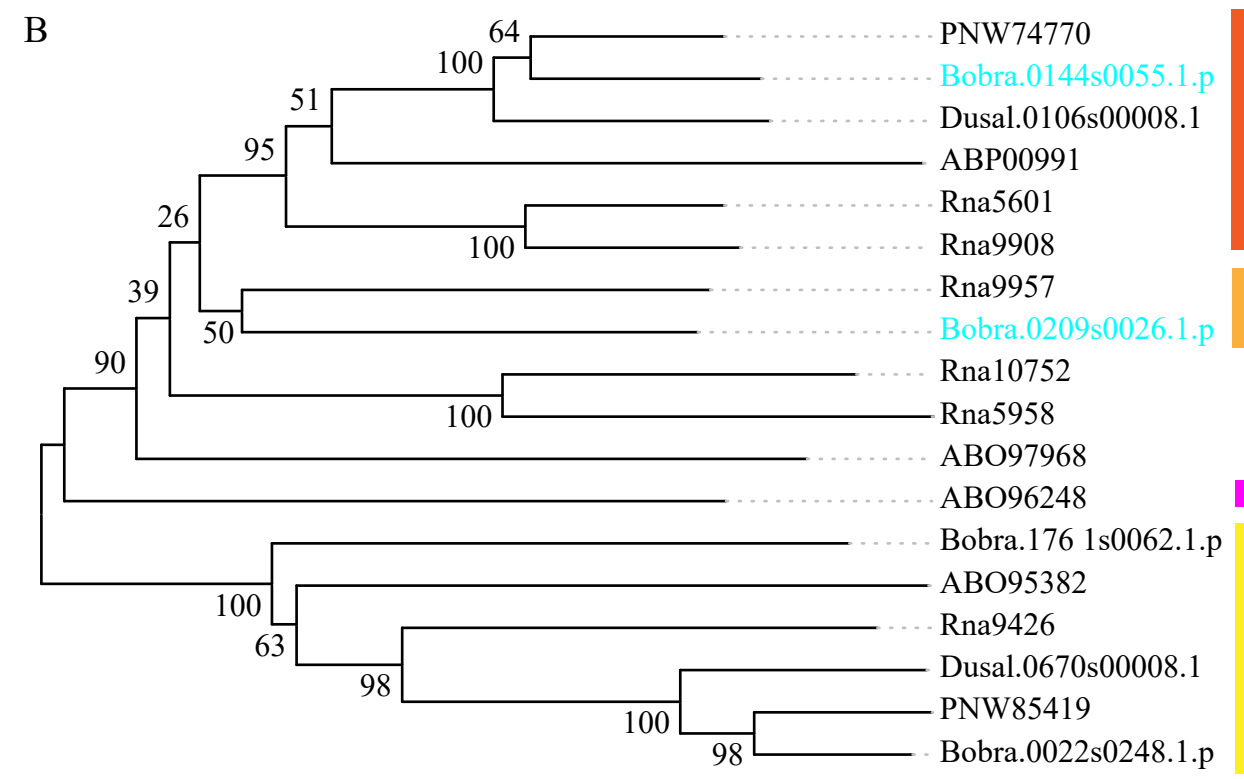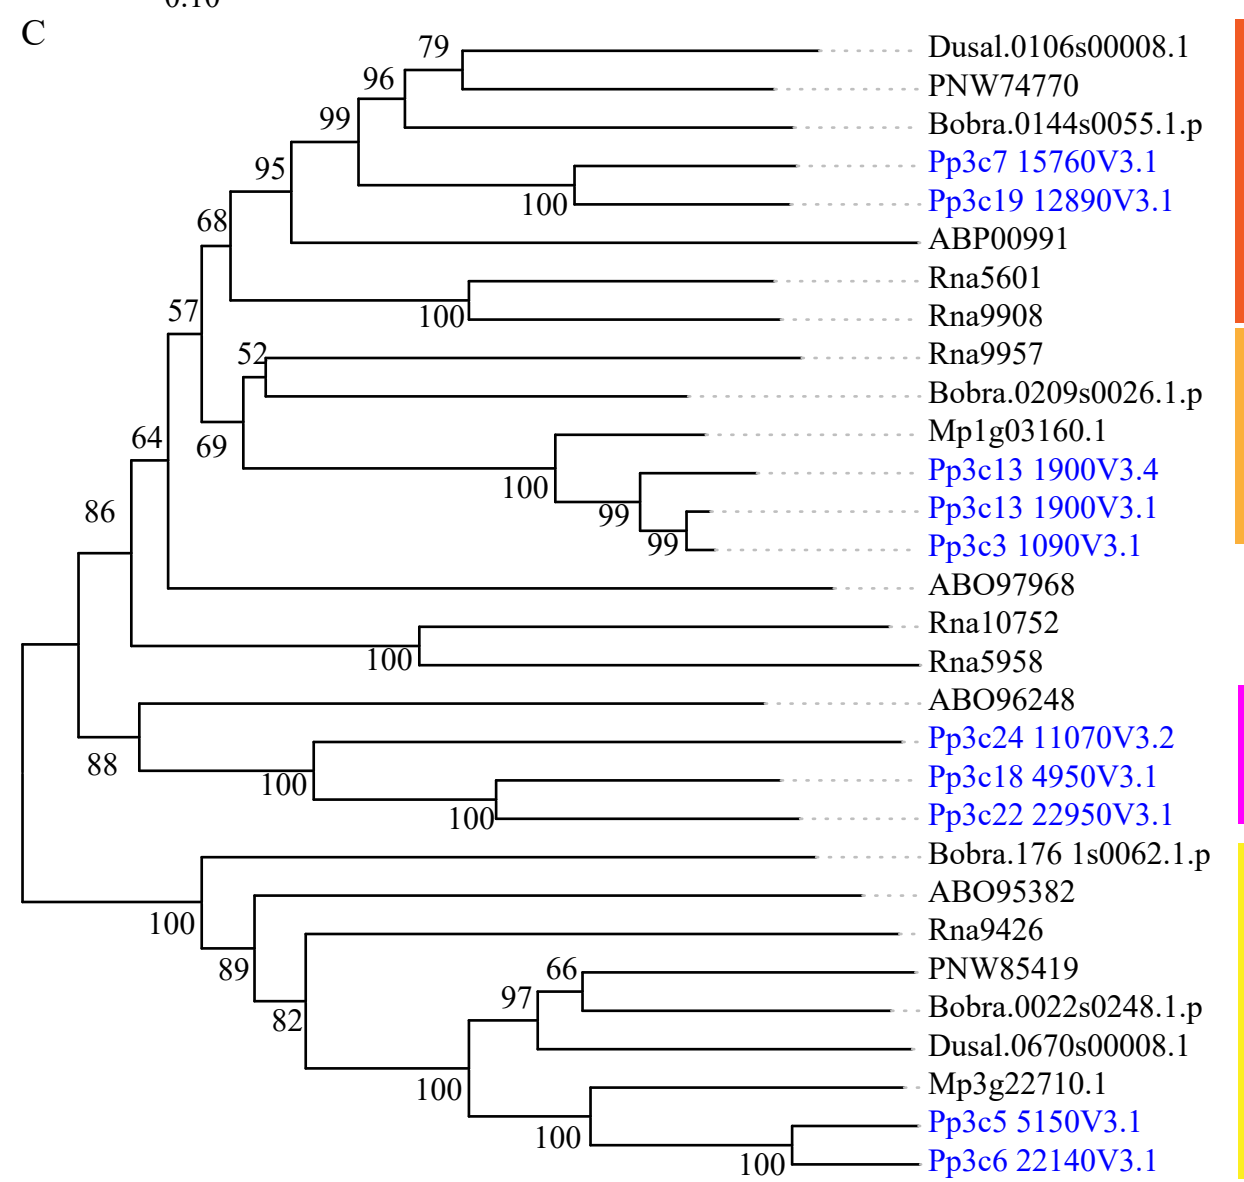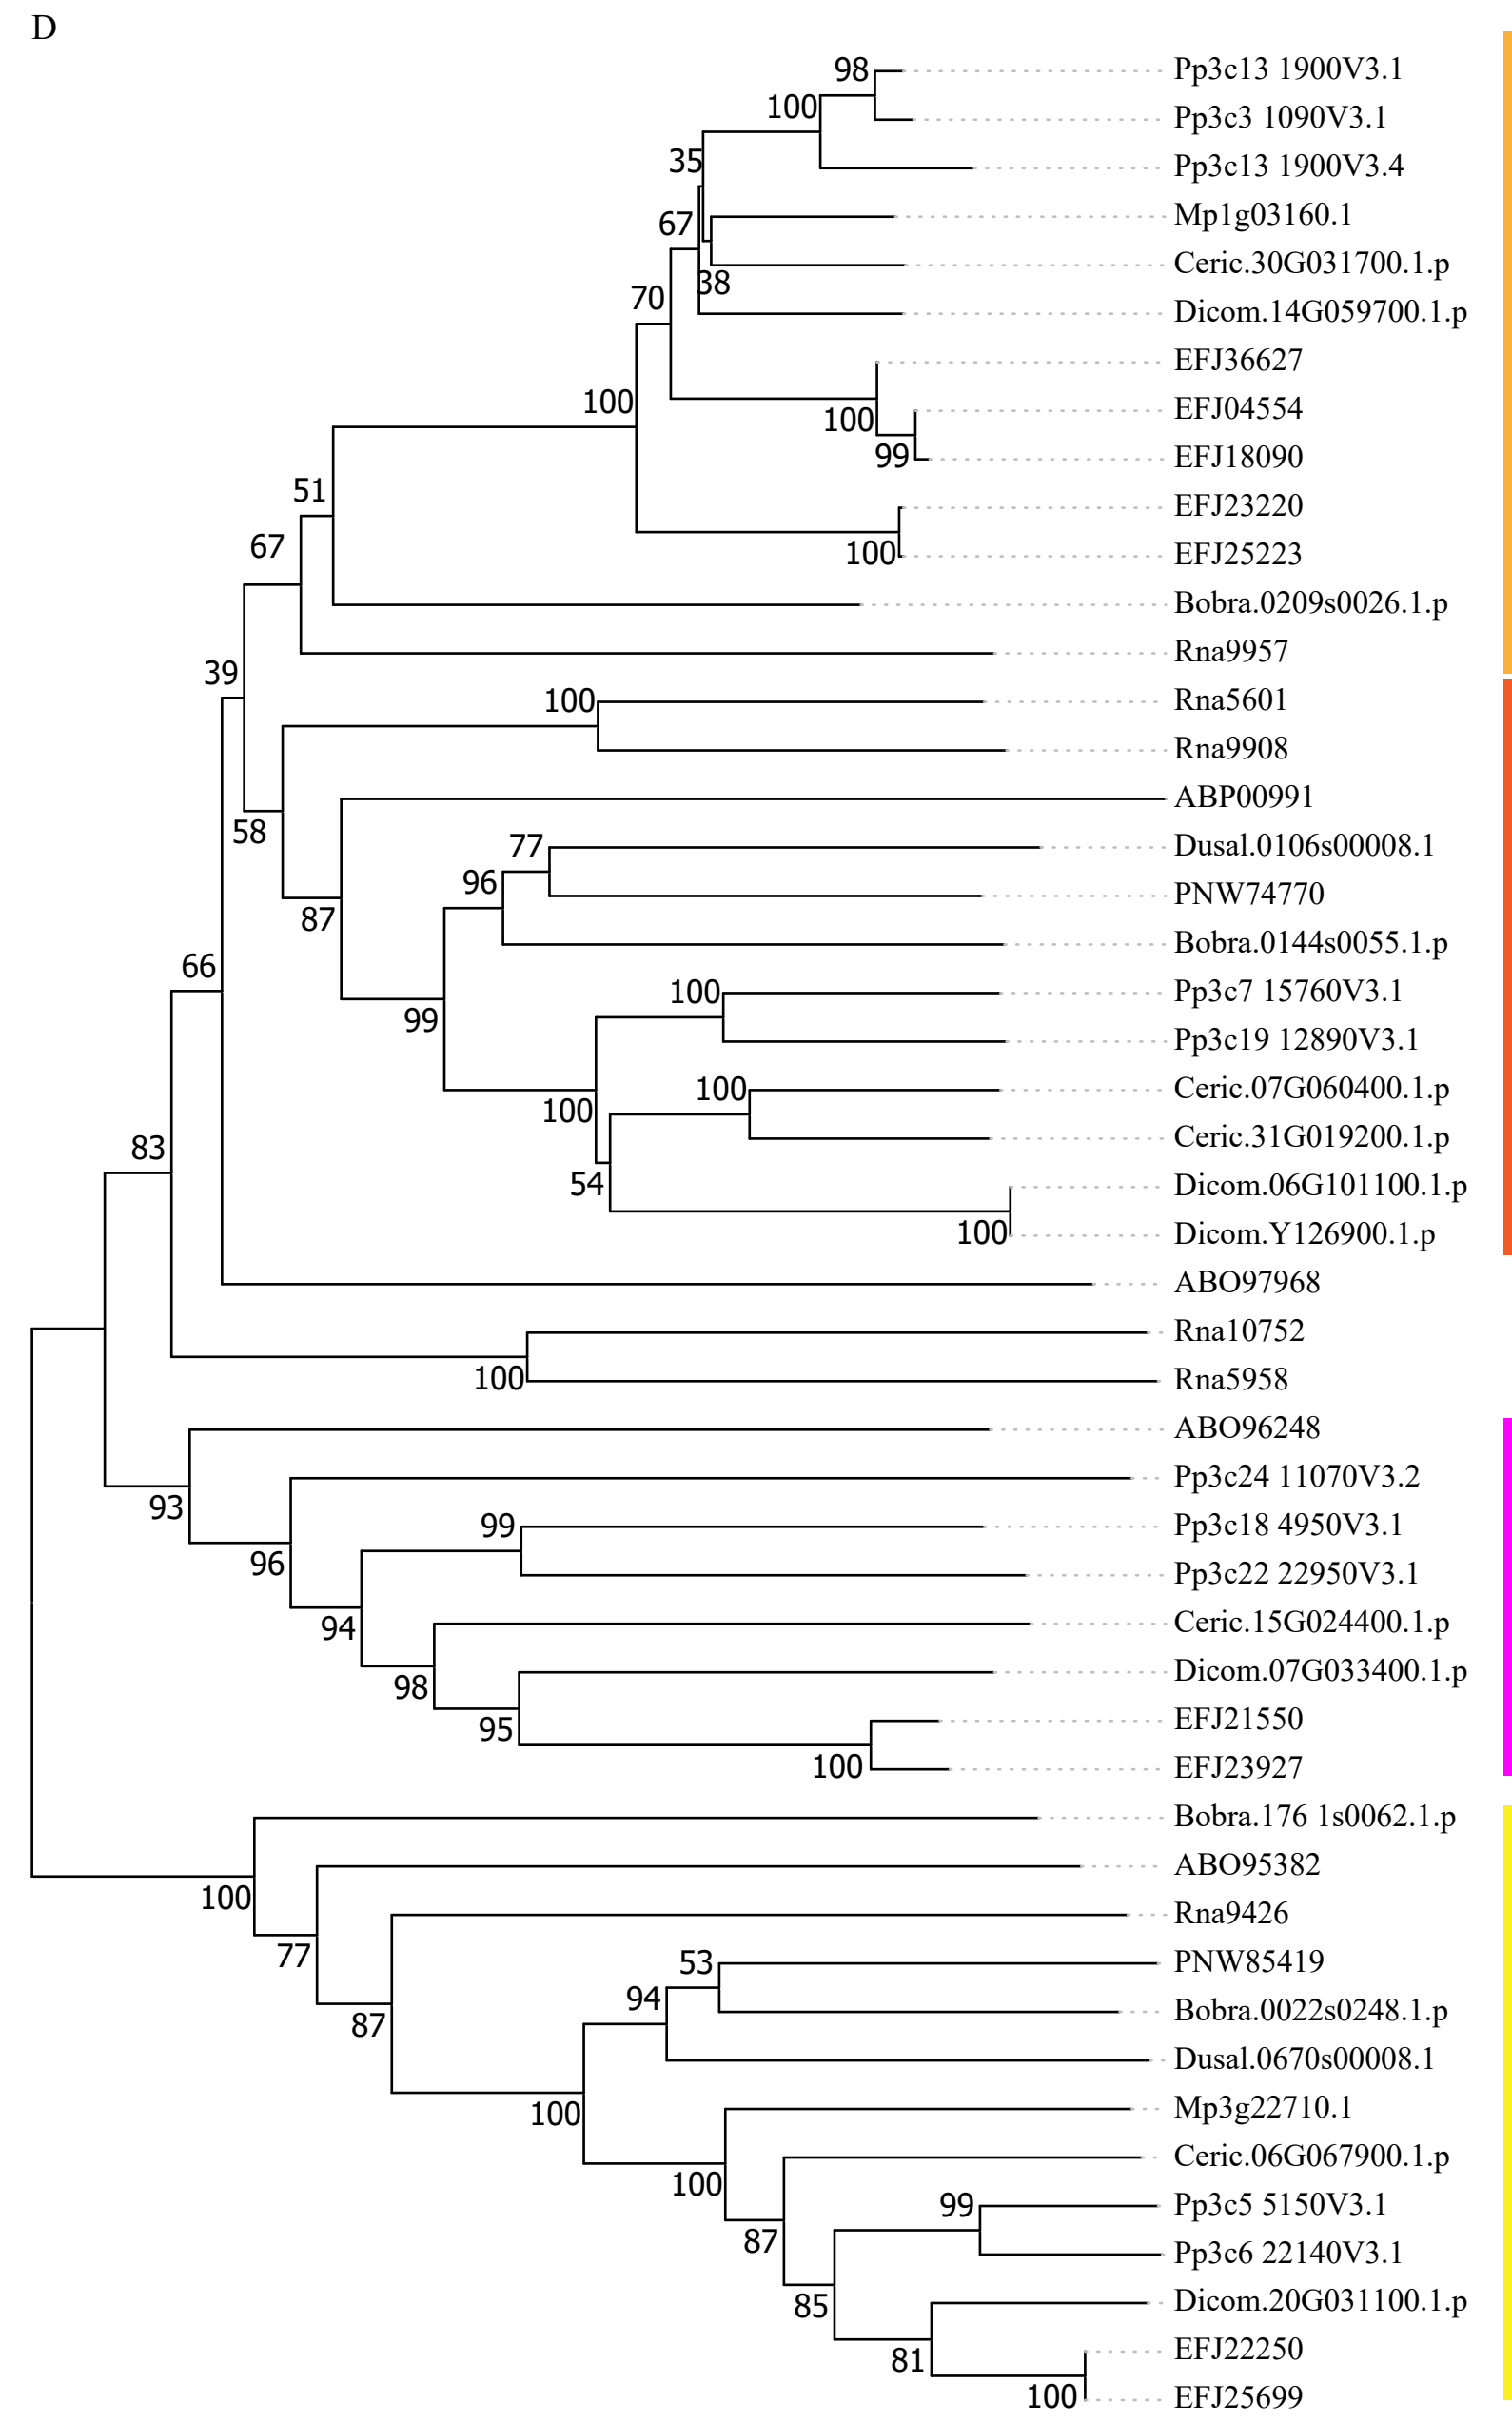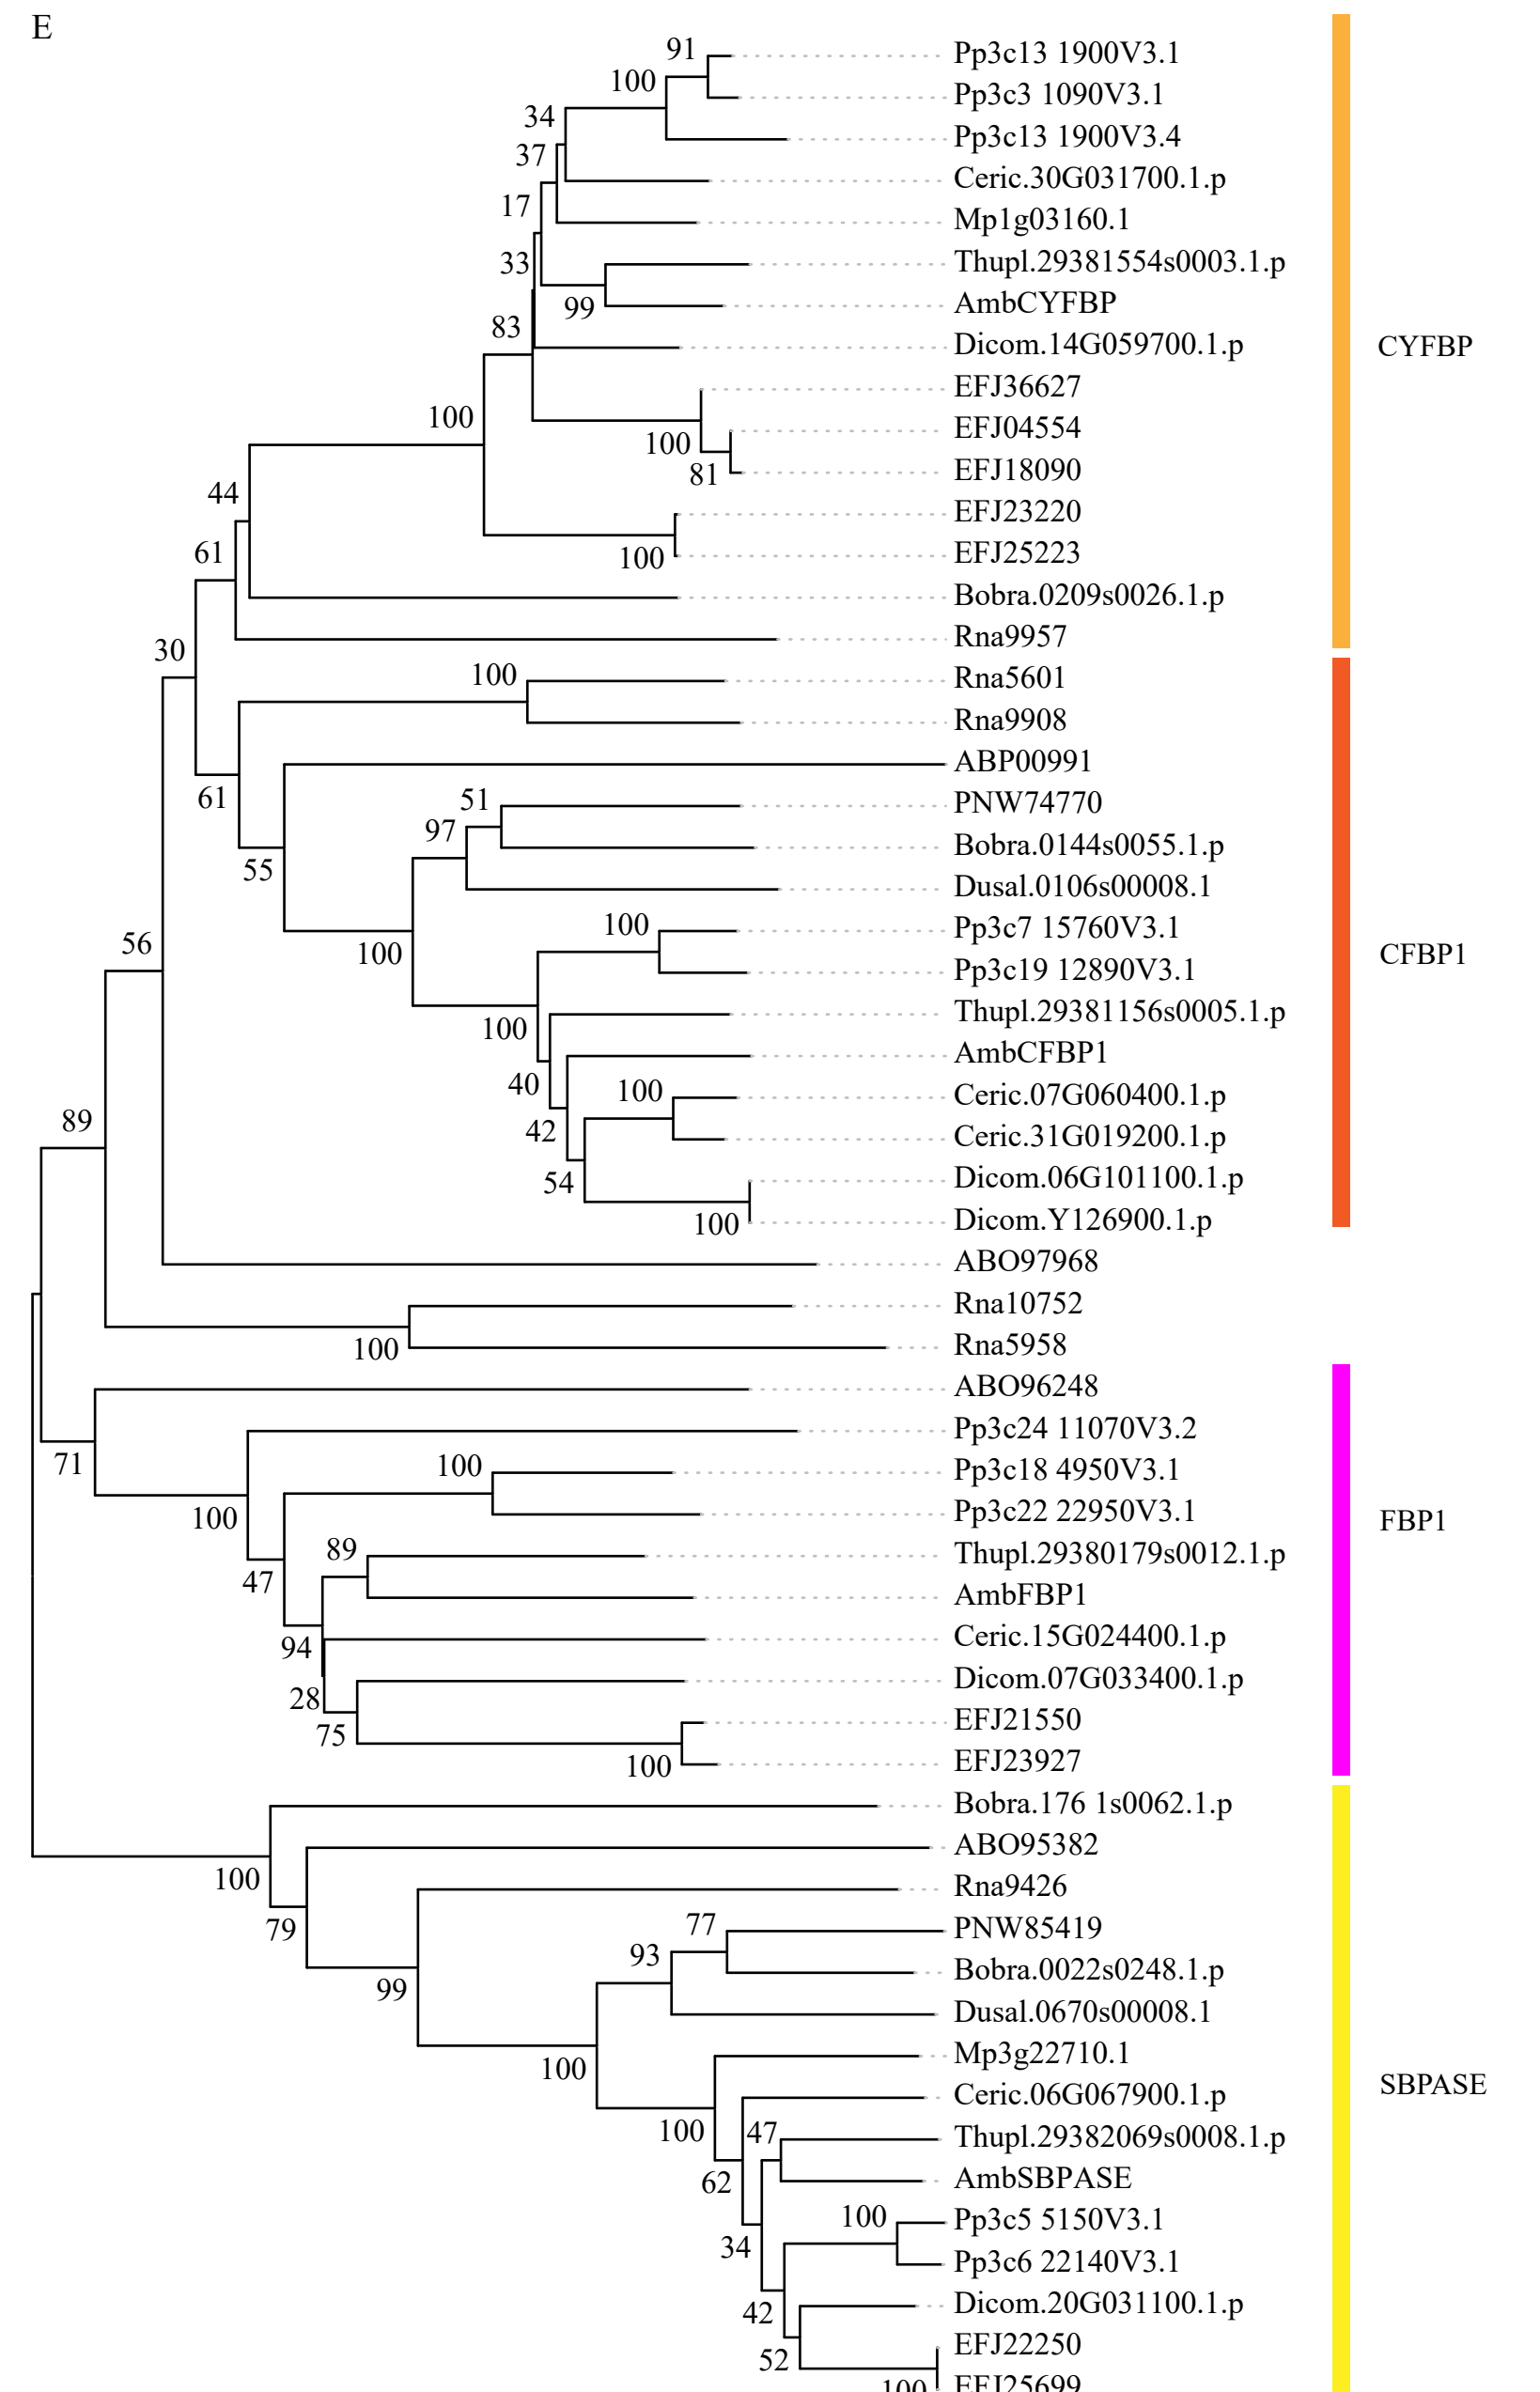

CYFBP

CFBP1

FBP1

SBPASE

Supplement: Supplementary file 4 [file fd97b86ed270c64a83e971b1.pdf]
